# Supplementary material
Source: publisher site journal article supplement (https://www.spandidos-publications.com/986/downloadSupplementary)
Supplement: Supplementary file 1 [file downloadSupplementary]

## Sheet: Additional file 2
Table SII. Results of the miRNA microarray.
SystematicName	518 KRAS G13D non-MSI ControlType	518 KRAS G13D non-MSI gTotalGeneSignal	518 KRAS G13D non-MSI gTotalGeneError	518 KRAS G13D non-MSI gIsGeneDetected	358 KRAS G12A non-MSI ControlType	358 KRAS G12A non-MSI gTotalGeneSignal	358 KRAS G12A non-MSI gTotalGeneError	358 KRAS G12A non-MSI gIsGeneDetected	341 BRAF V600E non-MSI ControlType	341 BRAF V600E non-MSI gTotalGeneSignal	341 BRAF V600E non-MSI gTotalGeneError	341 BRAF V600E non-MSI gIsGeneDetected	448 BRAF V600E MSI ControlType	448 BRAF V600E MSI gTotalGeneSignal	448 BRAF V600E MSI gTotalGeneError	448 BRAF V600E MSI gIsGeneDetected	460 Wild-type non-MSI ControlType	460 Wild-type non-MSI gTotalGeneSignal	460 Wild-type non-MSI gTotalGeneError	460 Wild-type non-MSI gIsGeneDetected	331 Wild-type non-MSI ControlType	331 Wild-type non-MSI gTotalGeneSignal	331Wild-type non-MSI gTotalGeneError	331 Wild-type non-MSI gIsGeneDetected	460 Normal mucosa ControlType	460 Normal mucosa gTotalGeneSignal	460 Normal mucosa gTotalGeneError	460 Normal mucosa gIsGeneDetected	341 Normal mucosa ControlType	341 Normal mucosa gTotalGeneSignal	341 Normal mucosa gTotalGeneError	341 Normal mucosa gIsGeneDetected
Blank	1	0.1	1	0	1	0.1	1	0	1	0.1	1	0	1	0.1	1	0	1	0.1	1	0	1	0.1	1	0	1	0.1	1	0	1	0.1	1	0
NC1_00000197	-1	0.1	1	0	-1	0.1	1	0	-1	0.1	1	0	-1	0.1	1	0	-1	0.1	1	0	-1	0.1	1	0	-1	0.1	1	0	-1	0.1	1	0
NC1_00000215	-1	0.1	1	0	-1	0.1	1	0	-1	0.1	1	0	-1	0.1	1	0	-1	0.1	1	0	-1	0.1	1	0	-1	0.1	1	0	-1	0.1	1	0
NC2_00079215	-1	0.1	1	0	-1	0.1	1	0	-1	0.1	1	0	-1	0.1	1	0	-1	0.1	1	0	-1	0.1	1	0	-1	0.1	1	0	-1	0.1	1	0
NC2_00092197	-1	0.1	1	0	-1	0.1	1	0	-1	0.1	1	0	-1	0.1	1	0	-1	0.1	1	0	-1	0.1	1	0	-1	0.1	1	0	-1	0.1	1	0
NC2_00106057	-1	0.1	1	0	-1	0.1	1	0	-1	0.1	1	0	-1	0.1	1	0	-1	0.1	1	0	-1	0.1	1	0	-1	0.1	1	0	-1	0.1	1	0
NC2_00122731	-1	0.1	1	0	-1	0.1	1	0	-1	0.1	1	0	-1	0.1	1	0	-1	0.1	1	0	-1	0.1	1	0	-1	0.1	1	0	-1	0.1	1	0
NegativeControl	-1	0.1	1	0	-1	0.1	1	0	-1	0.1	1	0	-1	0.1	1	0	-1	0.1	1	0	-1	0.1	1	0	-1	0.1	1	0	-1	0.1	1	0
bkv-miR-B1-3p	0	0.1	1	0	0	0.1	1	0	0	0.1	1	0	0	0.1	1	0	0	0.1	1	0	0	0.1	1	0	0	0.1	1	0	0	0.1	1	0
bkv-miR-B1-5p	0	0.1	1	0	0	0.1	1	0	0	0.1	1	0	0	0.1	1	0	0	0.1	1	0	0	0.1	1	0	0	0.1	1	0	0	0.1	1	0
dmr_285	1	4620.34	375.632	1	1	4599.55	370.033	1	1	2837.08	238.761	1	1	4426.29	357.547	1	1	4073.17	340.242	1	1	3962.17	317.26	1	1	4285.55	347.125	1	1	1032.37	85.76	1
dmr_3	1	6498.85	481.424	1	1	6270.84	458.406	1	1	5980.41	447.917	1	1	4943.75	362.864	1	1	5768.15	434.738	1	1	5909.27	432.891	1	1	6700.44	494.006	1	1	7993.97	603.27	1
dmr_308	1	0.1	1	0	1	0.1	1	0	1	0.1	1	0	1	0.1	1	0	1	0.1	1	0	1	0.1	1	0	1	0.1	1	0	1	0.1	1	0
dmr_316	1	0.1	1	0	1	0.1	1	0	1	0.1	1	0	1	0.1	1	0	1	0.1	1	0	1	0.1	1	0	1	0.1	1	0	1	0.1	1	0
dmr_31a	1	1588.84	113.41	1	1	1672.23	119.255	1	1	1007.55	71.8089	1	1	1469.54	104.848	1	1	1475.35	105.101	1	1	1288.98	91.9378	1	1	1509.53	107.675	1	1	518.706	37.0632	1
dmr_6	1	4505.67	326.673	1	1	4439.49	320.85	1	1	3382.5	246.089	1	1	3587.1	259.636	1	1	3738.62	271.972	1	1	4425.11	319.631	1	1	4431.54	320.334	1	1	5476.25	398.554	1
ebv-miR-BART1-3p	0	0.1	1	0	0	0.1	1	0	0	0.1	1	0	0	0.1	1	0	0	0.1	1	0	0	0.1	1	0	0	0.1	1	0	0	0.1	1	0
ebv-miR-BART1-5p	0	0.1	1	0	0	0.1	1	0	0	0.1	1	0	0	0.1	1	0	0	0.1	1	0	0	0.1	1	0	0	0.1	1	0	0	0.1	1	0
ebv-miR-BART10	0	0.1	1	0	0	0.1	1	0	0	0.1	1	0	0	0.1	1	0	0	0.1	1	0	0	0.1	1	0	0	0.1	1	0	0	0.1	1	0
ebv-miR-BART10*	0	0.1	1	0	0	0.1	1	0	0	0.1	1	0	0	0.1	1	0	0	0.1	1	0	0	0.1	1	0	0	0.1	1	0	0	0.1	1	0
ebv-miR-BART11-3p	0	0.1	1	0	0	0.1	1	0	0	0.1	1	0	0	0.1	1	0	0	0.1	1	0	0	0.1	1	0	0	0.1	1	0	0	0.1	1	0
ebv-miR-BART11-5p	0	0.1	1	0	0	0.1	1	0	0	0.1	1	0	0	0.1	1	0	0	0.1	1	0	0	0.1	1	0	0	0.1	1	0	0	0.1	1	0
ebv-miR-BART12	0	0.1	1	0	0	0.1	1	0	0	0.1	1	0	0	0.1	1	0	0	7.95451	1.61722	1	0	0.1	1	0	0	0.1	1	0	0	0.1	1	0
ebv-miR-BART13	0	70.2457	6.15633	1	0	68.2929	5.89083	1	0	51.9961	5.0519	1	0	62.8854	5.64786	1	0	63.5706	5.4822	1	0	43.2596	4.72956	1	0	67.0227	5.97916	1	0	85.4429	6.87787	1
ebv-miR-BART13*	0	0.1	1	0	0	0.1	1	0	0	0.1	1	0	0	0.1	1	0	0	0.1	1	0	0	0.1	1	0	0	0.1	1	0	0	0.1	1	0
ebv-miR-BART14	0	0.1	1	0	0	0.1	1	0	0	0.1	1	0	0	0.1	1	0	0	0.1	1	0	0	0.1	1	0	0	0.1	1	0	0	0.1	1	0
ebv-miR-BART14*	0	0.1	1	0	0	0.1	1	0	0	0.1	1	0	0	0.1	1	0	0	0.1	1	0	0	0.1	1	0	0	0.1	1	0	0	0.1	1	0
ebv-miR-BART15	0	0.1	1	0	0	0.1	1	0	0	0.1	1	0	0	0.1	1	0	0	0.1	1	0	0	0.1	1	0	0	0.1	1	0	0	0.1	1	0
ebv-miR-BART16	0	0.1	1	0	0	0.1	1	0	0	0.1	1	0	0	0.1	1	0	0	3.51993	1.13112	1	0	0.1	1	0	0	0.1	1	0	0	0.1	1	0
ebv-miR-BART17-3p	0	0.1	1	0	0	0.1	1	0	0	0.1	1	0	0	0.1	1	0	0	0.1	1	0	0	0.1	1	0	0	0.1	1	0	0	0.1	1	0
ebv-miR-BART17-5p	0	0.1	1	0	0	0.1	1	0	0	0.1	1	0	0	0.1	1	0	0	0.1	1	0	0	0.1	1	0	0	0.1	1	0	0	0.1	1	0
ebv-miR-BART18-3p	0	0.1	1	0	0	0.1	1	0	0	0.1	1	0	0	0.1	1	0	0	0.1	1	0	0	0.1	1	0	0	0.1	1	0	0	0.1	1	0
ebv-miR-BART18-5p	0	0.1	1	0	0	0.1	1	0	0	0.1	1	0	0	0.1	1	0	0	0.1	1	0	0	0.1	1	0	0	0.1	1	0	0	0.1	1	0
ebv-miR-BART19-3p	0	0.1	1	0	0	80.3773	4.74783	1	0	8.18766	1.73601	1	0	8.62086	1.80871	1	0	78.9097	4.6604	1	0	73.0349	4.59378	1	0	44.425	3.38261	1	0	251.677	13.2437	1
ebv-miR-BART19-5p	0	0.1	1	0	0	0.1	1	0	0	0.1	1	0	0	0.1	1	0	0	0.1	1	0	0	0.1	1	0	0	0.1	1	0	0	0.1	1	0
ebv-miR-BART2-3p	0	0.1	1	0	0	0.1	1	0	0	0.1	1	0	0	0.1	1	0	0	0.1	1	0	0	0.1	1	0	0	0.1	1	0	0	0.1	1	0
ebv-miR-BART2-5p	0	0.1	1	0	0	0.1	1	0	0	0.1	1	0	0	0.1	1	0	0	0.1	1	0	0	0.1	1	0	0	0.1	1	0	0	0.1	1	0
ebv-miR-BART20-3p	0	0.1	1	0	0	0.1	1	0	0	0.1	1	0	0	0.1	1	0	0	0.1	1	0	0	0.1	1	0	0	0.1	1	0	0	0.1	1	0
ebv-miR-BART20-5p	0	0.1	1	0	0	0.1	1	0	0	0.1	1	0	0	0.1	1	0	0	0.1	1	0	0	0.1	1	0	0	0.1	1	0	0	0.1	1	0
ebv-miR-BART21-3p	0	0.1	1	0	0	0.1	1	0	0	0.1	1	0	0	0.1	1	0	0	0.1	1	0	0	0.1	1	0	0	0.1	1	0	0	0.1	1	0
ebv-miR-BART21-5p	0	0.1	1	0	0	0.1	1	0	0	0.1	1	0	0	0.1	1	0	0	0.1	1	0	0	0.1	1	0	0	0.1	1	0	0	0.1	1	0
ebv-miR-BART22	0	0.1	1	0	0	0.1	1	0	0	0.1	1	0	0	0.1	1	0	0	0.1	1	0	0	0.1	1	0	0	0.1	1	0	0	0.1	1	0
ebv-miR-BART3	0	0.1	1	0	0	0.1	1	0	0	0.1	1	0	0	0.1	1	0	0	0.1	1	0	0	0.1	1	0	0	0.1	1	0	0	0.1	1	0
ebv-miR-BART3*	0	0.1	1	0	0	0.1	1	0	0	0.1	1	0	0	0.1	1	0	0	10.0462	1.68105	1	0	5.41218	1.36914	1	0	0.1	1	0	0	13.0567	1.88496	1
ebv-miR-BART4	0	0.1	1	0	0	0.1	1	0	0	0.1	1	0	0	0.1	1	0	0	0.1	1	0	0	0.1	1	0	0	0.1	1	0	0	0.1	1	0
ebv-miR-BART4*	0	0.1	1	0	0	0.1	1	0	0	0.1	1	0	0	0.1	1	0	0	0.1	1	0	0	0.1	1	0	0	0.1	1	0	0	0.1	1	0
ebv-miR-BART5	0	0.1	1	0	0	0.1	1	0	0	0.1	1	0	0	0.1	1	0	0	0.1	1	0	0	0.1	1	0	0	0.1	1	0	0	0.1	1	0
ebv-miR-BART5*	0	0.1	1	0	0	0.1	1	0	0	0.1	1	0	0	0.1	1	0	0	0.1	1	0	0	0.1	1	0	0	0.1	1	0	0	0.1	1	0
ebv-miR-BART6-3p	0	0.1	1	0	0	0.1	1	0	0	0.1	1	0	0	0.1	1	0	0	0.1	1	0	0	0.1	1	0	0	0.1	1	0	0	0.1	1	0
ebv-miR-BART6-5p	0	0.1	1	0	0	0.1	1	0	0	0.1	1	0	0	0.1	1	0	0	0.1	1	0	0	0.1	1	0	0	0.1	1	0	0	0.1	1	0
ebv-miR-BART7	0	0.1	1	0	0	0.1	1	0	0	0.1	1	0	0	0.1	1	0	0	0.1	1	0	0	0.1	1	0	0	0.1	1	0	0	0.1	1	0
ebv-miR-BART7*	0	0.1	1	0	0	0.1	1	0	0	0.1	1	0	0	0.1	1	0	0	0.1	1	0	0	0.1	1	0	0	0.1	1	0	0	0.1	1	0
ebv-miR-BART8	0	0.1	1	0	0	0.1	1	0	0	0.1	1	0	0	0.1	1	0	0	0.1	1	0	0	0.1	1	0	0	0.1	1	0	0	0.1	1	0
ebv-miR-BART8*	0	0.1	1	0	0	0.1	1	0	0	0.1	1	0	0	0.1	1	0	0	0.1	1	0	0	0.1	1	0	0	0.1	1	0	0	0.1	1	0
ebv-miR-BART9	0	0.1	1	0	0	0.1	1	0	0	0.1	1	0	0	0.1	1	0	0	0.1	1	0	0	0.1	1	0	0	0.1	1	0	0	0.1	1	0
ebv-miR-BART9*	0	0.1	1	0	0	0.1	1	0	0	0.1	1	0	0	0.1	1	0	0	0.1	1	0	0	0.1	1	0	0	0.1	1	0	0	0.1	1	0
ebv-miR-BHRF1-1	0	0.1	1	0	0	0.1	1	0	0	7.86718	1.39867	1	0	0.1	1	0	0	8.22695	1.3529	1	0	0.1	1	0	0	0.1	1	0	0	4.80348	1.24193	1
ebv-miR-BHRF1-2	0	0.1	1	0	0	0.1	1	0	0	0.1	1	0	0	0.1	1	0	0	0.1	1	0	0	0.1	1	0	0	0.1	1	0	0	0.1	1	0
ebv-miR-BHRF1-2*	0	0.1	1	0	0	0.1	1	0	0	0.1	1	0	0	0.1	1	0	0	0.1	1	0	0	0.1	1	0	0	0.1	1	0	0	0.1	1	0
ebv-miR-BHRF1-3	0	0.1	1	0	0	0.1	1	0	0	0.1	1	0	0	0.1	1	0	0	0.1	1	0	0	0.1	1	0	0	0.1	1	0	0	0.1	1	0
hbv-miR-B20	0	0.1	1	0	0	0.1	1	0	0	0.1	1	0	0	0.1	1	0	0	0.1	1	0	0	0.1	1	0	0	0.1	1	0	0	0.1	1	0
hbv-miR-B2RC	0	94.146	7.80485	1	0	32.7233	3.96668	1	0	43.7903	4.67198	1	0	64.7142	5.89463	1	0	11.6464	2.44275	1	0	28.1954	4.14994	1	0	44.315	4.74359	1	0	28.2793	3.87114	1
hbv-miR-B4	0	15.9446	3.52417	1	0	0.1	1	0	0	0.1	1	0	0	0.1	1	0	0	0.1	1	0	0	0.1	1	0	0	0.1	1	0	0	0.1	1	0
hcmv-miR-UL112	0	0.1	1	0	0	0.1	1	0	0	0.1	1	0	0	0.1	1	0	0	0.1	1	0	0	0.1	1	0	0	0.1	1	0	0	0.1	1	0
hcmv-miR-UL148D	0	0.1	1	0	0	0.1	1	0	0	0.1	1	0	0	0.1	1	0	0	0.1	1	0	0	0.1	1	0	0	0.1	1	0	0	0.1	1	0
hcmv-miR-UL22A	0	0.1	1	0	0	0.1	1	0	0	0.1	1	0	0	0.1	1	0	0	0.1	1	0	0	0.1	1	0	0	0.1	1	0	0	0.1	1	0
hcmv-miR-UL22A*	0	0.1	1	0	0	0.1	1	0	0	0.1	1	0	0	0.1	1	0	0	0.1	1	0	0	0.1	1	0	0	0.1	1	0	0	0.1	1	0
hcmv-miR-UL36	0	0.1	1	0	0	0.1	1	0	0	0.1	1	0	0	0.1	1	0	0	0.1	1	0	0	0.1	1	0	0	0.1	1	0	0	0.1	1	0
hcmv-miR-UL36*	0	0.1	1	0	0	0.1	1	0	0	0.1	1	0	0	0.1	1	0	0	0.1	1	0	0	0.1	1	0	0	0.1	1	0	0	0.1	1	0
hcmv-miR-UL70-3p	0	246.218	17.8958	1	0	139.609	10.5331	1	0	81.142	6.73716	1	0	187.769	13.9203	1	0	103.689	8.10567	1	0	124.48	9.64472	1	0	248.946	18.308	1	0	181.984	13.5211	1
hcmv-miR-UL70-5p	0	0.1	1	0	0	0.1	1	0	0	0.1	1	0	0	0.1	1	0	0	0.1	1	0	0	0.1	1	0	0	0.1	1	0	0	0.1	1	0
hcmv-miR-US25-1	0	0.1	1	0	0	0.1	1	0	0	0.1	1	0	0	0.1	1	0	0	0.1	1	0	0	0.1	1	0	0	0.1	1	0	0	0.1	1	0
hcmv-miR-US25-1*	0	0.1	1	0	0	0.1	1	0	0	0.1	1	0	0	0.1	1	0	0	0.1	1	0	0	0.1	1	0	0	0.1	1	0	0	0.1	1	0
hcmv-miR-US25-2-3p	0	0.1	1	0	0	0.1	1	0	0	0.1	1	0	0	0.1	1	0	0	0.1	1	0	0	0.1	1	0	0	0.1	1	0	0	0.1	1	0
hcmv-miR-US25-2-5p	0	0.1	1	0	0	0.1	1	0	0	0.1	1	0	0	0.1	1	0	0	0.1	1	0	0	0.1	1	0	0	0.1	1	0	0	0.1	1	0
hcmv-miR-US33-3p	0	0.1	1	0	0	0.1	1	0	0	0.1	1	0	0	0.1	1	0	0	0.1	1	0	0	0.1	1	0	0	0.1	1	0	0	0.1	1	0
hcmv-miR-US33-5p	0	0.1	1	0	0	0.1	1	0	0	0.1	1	0	0	0.1	1	0	0	0.1	1	0	0	0.1	1	0	0	0.1	1	0	0	0.1	1	0
hcmv-miR-US4	0	59.1515	3.81002	1	0	22.0641	2.4505	1	0	71.0653	4.26504	1	0	54.3603	3.63727	1	0	14.2137	2.03062	1	0	38.7875	3.19641	1	0	42.3531	3.23468	1	0	18.8394	2.47856	1
hcmv-miR-US5-1	0	0.1	1	0	0	0.1	1	0	0	0.1	1	0	0	0.1	1	0	0	0.1	1	0	0	0.1	1	0	0	0.1	1	0	0	0.1	1	0
hcmv-miR-US5-2	0	0.1	1	0	0	0.1	1	0	0	0.1	1	0	0	0.1	1	0	0	0.1	1	0	0	0.1	1	0	0	0.1	1	0	0	0.1	1	0
hiv1-miR-H1	0	28.9068	3.74105	1	0	30.0174	3.81544	1	0	54.3569	5.90975	1	0	10.6174	2.62157	1	0	15.2662	2.64409	1	0	23.3856	3.43775	1	0	33.9457	4.17859	1	0	64.3497	5.6465	1
hiv1-miR-N367	0	0.1	1	0	0	0.1	1	0	0	0.1	1	0	0	0.1	1	0	0	0.1	1	0	0	0.1	1	0	0	0.1	1	0	0	0.1	1	0
hiv1-miR-TAR-3p	0	0.1	1	0	0	0.1	1	0	0	0.1	1	0	0	0.1	1	0	0	0.1	1	0	0	0.1	1	0	0	0.1	1	0	0	0.1	1	0
hiv1-miR-TAR-5p	0	0.1	1	0	0	0.1	1	0	0	0.1	1	0	0	0.1	1	0	0	0.1	1	0	0	0.1	1	0	0	0.1	1	0	0	0.1	1	0
hsa-let-7a	0	13918.6	1030.05	1	0	4676.97	342.916	1	0	9134.05	686.229	1	0	7176.69	531.727	1	0	17841.4	1354.06	1	0	9820.95	729.541	1	0	16126.7	1199.01	1	0	2250.95	170.269	1
hsa-let-7a*	0	0.1	1	0	0	0.1	1	0	0	0.1	1	0	0	0.1	1	0	0	0.1	1	0	0	0.1	1	0	0	0.1	1	0	0	0.1	1	0
hsa-let-7b	0	8845.64	648.278	1	0	2831.63	205.46	1	0	7766.26	571.586	1	0	3907.77	287.941	1	0	21154.3	1586.12	1	0	8790.09	641.946	1	0	11845.8	867.009	1	0	4830.96	359.002	1
hsa-let-7b*	0	0.1	1	0	0	3.55413	1.14514	1	0	3.64586	1.21175	1	0	3.86178	1.25798	1	0	17.3858	2.32203	1	0	0.1	1	0	0	0.1	1	0	0	17.0924	2.44078	1
hsa-let-7c	0	1708.52	156.299	1	0	621.754	56.559	1	0	1606.61	147.119	1	0	736.338	67.3238	1	0	7105.9	603.594	1	0	1828.43	163.865	1	0	2449.74	220.621	1	0	855.528	78.3519	1
hsa-let-7c*	0	0.1	1	0	0	0.1	1	0	0	0.1	1	0	0	0.1	1	0	0	0.1	1	0	0	0.1	1	0	0	0.1	1	0	0	0.1	1	0
hsa-let-7d	0	2146.7	164.389	1	0	843.583	63.565	1	0	1075.67	84.5342	1	0	1528.84	117.142	1	0	1699.6	135.121	1	0	1098.61	84.9729	1	0	1726.76	134.176	1	0	291.248	23.18	1
hsa-let-7d*	0	0.1	1	0	0	0.1	1	0	0	0.1	1	0	0	0.1	1	0	0	0.1	1	0	0	0.1	1	0	0	0.1	1	0	0	0.1	1	0
hsa-let-7e	0	838.448	62.538	1	0	185.1	14.0615	1	0	1450.51	108.172	1	0	304.107	22.9555	1	0	2015.66	153.815	1	0	702.249	52.8459	1	0	1028.66	77.4114	1	0	186.193	14.5641	1
hsa-let-7e*	0	0.1	1	0	0	0.1	1	0	0	0.1	1	0	0	0.1	1	0	0	0.1	1	0	0	0.1	1	0	0	0.1	1	0	0	0.1	1	0
hsa-let-7f	0	11434.4	959.632	1	0	4625.3	379.885	1	0	5877.25	513.707	1	0	6670.28	553.814	1	0	9928.54	871.61	1	0	7168.37	602.503	1	0	12226.7	1027.74	1	0	1356.79	118.953	1
hsa-let-7f-1*	0	0.1	1	0	0	0.1	1	0	0	7.41647	1.71347	1	0	0.1	1	0	0	16.2901	2.296	1	0	0.1	1	0	0	0.1	1	0	0	12.4429	2.1082	1
hsa-let-7f-2*	0	0.1	1	0	0	0.1	1	0	0	0.1	1	0	0	0.1	1	0	0	0.1	1	0	0	0.1	1	0	0	0.1	1	0	0	0.1	1	0
hsa-let-7g	0	5611.6	424.453	1	0	2318.04	172.728	1	0	2155.64	168.946	1	0	3957.19	299.065	1	0	4853.19	382.966	1	0	3529.66	268.046	1	0	6000.41	456.704	1	0	958.735	75.1622	1
hsa-let-7g*	0	0.1	1	0	0	0.1	1	0	0	0.1	1	0	0	0.1	1	0	0	0.1	1	0	0	0.1	1	0	0	0.1	1	0	0	0.1	1	0
hsa-let-7i	0	2697.46	197.07	1	0	1201.74	86.9611	1	0	6001	439.609	1	0	3244.11	237.052	1	0	4484.5	335.202	1	0	1751.17	128.191	1	0	2660.8	195.334	1	0	614.576	45.8133	1
hsa-let-7i*	0	0.1	1	0	0	0.1	1	0	0	0.1	1	0	0	0.1	1	0	0	0.1	1	0	0	0.1	1	0	0	0.1	1	0	0	0.1	1	0
hsa-miR-1	0	73.5271	7.72992	1	0	11.0685	2.45133	1	0	10.8814	2.55603	1	0	10.7294	2.62714	1	0	846.218	78.6265	1	0	226.174	20.9436	1	0	430.024	39.472	1	0	28.1765	3.63216	1
hsa-miR-100	0	88.6889	7.52511	1	0	11.3038	2.45661	1	0	2283.17	166.445	1	0	43.3888	4.7496	1	0	3176.02	244.919	1	0	285.151	22.5049	1	0	623.129	48.565	1	0	107.014	8.7007	1
hsa-miR-100*	0	0.1	1	0	0	0.1	1	0	0	3.7588	1.21468	1	0	0.1	1	0	0	0.1	1	0	0	0.1	1	0	0	0.1	1	0	0	0.1	1	0
hsa-miR-101	0	323.281	24.9516	1	0	102.211	8.34337	1	0	144.141	11.5762	1	0	142.998	11.4498	1	0	379.141	29.3012	1	0	123.785	10.1603	1	0	181.283	14.3014	1	0	64.4353	5.87086	1
hsa-miR-101*	0	0.1	1	0	0	0.1	1	0	0	0.1	1	0	0	0.1	1	0	0	0.1	1	0	0	0.1	1	0	0	0.1	1	0	0	0.1	1	0
hsa-miR-103	0	2328.74	189.611	1	0	1023.8	81.3715	1	0	1591.2	132.88	1	0	1730.23	139.212	1	0	1687.77	138.648	1	0	1338.68	106.719	1	0	1867.78	150.209	1	0	591.024	47.011	1
hsa-miR-103-2*	0	0.1	1	0	0	0.1	1	0	0	0.1	1	0	0	0.1	1	0	0	0.1	1	0	0	0.1	1	0	0	0.1	1	0	0	0.1	1	0
hsa-miR-103-as	0	0.1	1	0	0	0.1	1	0	0	0.1	1	0	0	0.1	1	0	0	0.1	1	0	0	0.1	1	0	0	0.1	1	0	0	0.1	1	0
hsa-miR-105	0	0.1	1	0	0	0.1	1	0	0	0.1	1	0	0	0.1	1	0	0	0.1	1	0	0	0.1	1	0	0	0.1	1	0	0	0.1	1	0
hsa-miR-105*	0	0.1	1	0	0	0.1	1	0	0	0.1	1	0	0	0.1	1	0	0	0.1	1	0	0	0.1	1	0	0	0.1	1	0	0	0.1	1	0
hsa-miR-106a*	0	0.1	1	0	0	0.1	1	0	0	0.1	1	0	0	0.1	1	0	0	0.1	1	0	0	0.1	1	0	0	0.1	1	0	0	0.1	1	0
hsa-miR-106b	0	1797.69	137.903	1	0	882.809	67.5299	1	0	678.731	52.9678	1	0	1460.27	112.453	1	0	816.315	63.8645	1	0	586.464	44.8793	1	0	674.274	51.7653	1	0	369.651	28.6032	1
hsa-miR-106b*	0	0.1	1	0	0	0.1	1	0	0	0.1	1	0	0	0.1	1	0	0	0.1	1	0	0	0.1	1	0	0	0.1	1	0	0	0.1	1	0
hsa-miR-107	0	2141.19	172.569	1	0	959.874	76.925	1	0	1244.34	103.163	1	0	1638	134.972	1	0	1400.18	116.014	1	0	1243.91	100.84	1	0	1773.32	144.099	1	0	406.572	33.2194	1
hsa-miR-10a	0	1250.2	94.4244	1	0	619.736	46.3587	1	0	951.826	70.3152	1	0	783.898	59.1438	1	0	580.231	44.2702	1	0	1220.65	93.3146	1	0	1848.32	141.042	1	0	255.462	19.315	1
hsa-miR-10a*	0	0.1	1	0	0	0.1	1	0	0	0.1	1	0	0	0.1	1	0	0	0.1	1	0	0	0.1	1	0	0	0.1	1	0	0	0.1	1	0
hsa-miR-10b	0	351.091	28.5402	1	0	161.216	13.7144	1	0	502.301	39.2865	1	0	1111.44	86.3659	1	0	463.054	36.6946	1	0	1247.52	99.5155	1	0	1203.43	96.1589	1	0	236.923	18.7494	1
hsa-miR-10b*	0	0.1	1	0	0	0.1	1	0	0	0.1	1	0	0	0.1	1	0	0	0.1	1	0	0	0.1	1	0	0	0.1	1	0	0	0.1	1	0
hsa-miR-1178	0	0.1	1	0	0	0.1	1	0	0	0.1	1	0	0	0.1	1	0	0	0.1	1	0	0	0.1	1	0	0	0.1	1	0	0	0.1	1	0
hsa-miR-1179	0	0.1	1	0	0	0.1	1	0	0	0.1	1	0	0	0.1	1	0	0	0.1	1	0	0	0.1	1	0	0	0.1	1	0	0	0.1	1	0
hsa-miR-1180	0	0.1	1	0	0	0.1	1	0	0	0.1	1	0	0	0.1	1	0	0	0.1	1	0	0	0.1	1	0	0	0.1	1	0	0	0.1	1	0
hsa-miR-1181	0	34.9794	4.17285	1	0	85.3943	6.86372	1	0	17.2361	3.49016	1	0	32.0158	4.08441	1	0	51.0464	4.74753	1	0	8.64662	2.65182	1	0	35.3179	4.2702	1	0	62.7944	5.55302	1
hsa-miR-1182	0	36.2874	4.24114	1	0	0.1	1	0	0	39.9702	4.33706	1	0	9.51058	2.57694	1	0	7.20545	2.26007	1	0	19.2923	3.80507	1	0	32.2424	4.14255	1	0	12.0684	2.58659	1
hsa-miR-1183	0	85.1138	6.88942	1	0	25.3621	3.56672	1	0	71.7214	6.04355	1	0	48.9505	4.84937	1	0	24.4099	3.49537	1	0	40.2056	4.5536	1	0	59.4316	5.43603	1	0	32.6866	3.98249	1
hsa-miR-1184	0	0.1	1	0	0	0.1	1	0	0	0.1	1	0	0	0.1	1	0	0	0.1	1	0	0	0.1	1	0	0	0.1	1	0	0	0.1	1	0
hsa-miR-1185	0	0.1	1	0	0	0.1	1	0	0	0.1	1	0	0	0.1	1	0	0	0.1	1	0	0	0.1	1	0	0	0.1	1	0	0	0.1	1	0
hsa-miR-1193	0	0.1	1	0	0	0.1	1	0	0	0.1	1	0	0	0.1	1	0	0	0.1	1	0	0	0.1	1	0	0	0.1	1	0	0	0.1	1	0
hsa-miR-1197	0	0.1	1	0	0	0.1	1	0	0	0.1	1	0	0	0.1	1	0	0	0.1	1	0	0	0.1	1	0	0	0.1	1	0	0	0.1	1	0
hsa-miR-1200	0	0.1	1	0	0	0.1	1	0	0	0.1	1	0	0	0.1	1	0	0	0.1	1	0	0	0.1	1	0	0	0.1	1	0	0	0.1	1	0
hsa-miR-1202	0	7809.01	552.26	1	0	3343.35	236.472	1	0	2038.13	144.199	1	0	5318.1	376.11	1	0	1506.86	106.619	1	0	3314.89	234.444	1	0	8519.96	602.546	1	0	3257.74	230.392	1
hsa-miR-1203	0	0.1	1	0	0	0.1	1	0	0	0.1	1	0	0	0.1	1	0	0	0.1	1	0	0	0.1	1	0	0	0.1	1	0	0	0.1	1	0
hsa-miR-1204	0	0.1	1	0	0	0.1	1	0	0	0.1	1	0	0	0.1	1	0	0	0.1	1	0	0	0.1	1	0	0	0.1	1	0	0	0.1	1	0
hsa-miR-1205	0	0.1	1	0	0	0.1	1	0	0	0.1	1	0	0	0.1	1	0	0	0.1	1	0	0	0.1	1	0	0	0.1	1	0	0	0.1	1	0
hsa-miR-1206	0	0.1	1	0	0	0.1	1	0	0	0.1	1	0	0	0.1	1	0	0	0.1	1	0	0	0.1	1	0	0	0.1	1	0	0	0.1	1	0
hsa-miR-1207-3p	0	0.1	1	0	0	0.1	1	0	0	0.1	1	0	0	0.1	1	0	0	0.1	1	0	0	0.1	1	0	0	0.1	1	0	0	0.1	1	0
hsa-miR-1207-5p	0	4120.38	291.896	1	0	2637.64	186.792	1	0	1278.54	90.7725	1	0	5689.61	402.637	1	0	2105.56	148.981	1	0	2108.38	149.521	1	0	2831.25	200.631	1	0	2045.81	145.421	1
hsa-miR-1208	0	0.1	1	0	0	0.1	1	0	0	0.1	1	0	0	0.1	1	0	0	0.1	1	0	0	0.1	1	0	0	0.1	1	0	0	0.1	1	0
hsa-miR-122	0	0.1	1	0	0	0.1	1	0	0	0.1	1	0	0	0.1	1	0	0	63.7858	5.58514	1	0	0.1	1	0	0	0.1	1	0	0	0.1	1	0
hsa-miR-122*	0	0.1	1	0	0	0.1	1	0	0	0.1	1	0	0	0.1	1	0	0	0.1	1	0	0	0.1	1	0	0	0.1	1	0	0	0.1	1	0
hsa-miR-1224-3p	0	0.1	1	0	0	0.1	1	0	0	0.1	1	0	0	0.1	1	0	0	0.1	1	0	0	0.1	1	0	0	0.1	1	0	0	0.1	1	0
hsa-miR-1224-5p	0	250.326	18.032	1	0	102.455	7.87524	1	0	158.733	11.7187	1	0	167.862	12.3655	1	0	138.189	10.2471	1	0	117.317	9.03429	1	0	196.347	14.3485	1	0	143.119	10.6576	1
hsa-miR-1225-3p	0	19.8697	3.62605	1	0	19.5388	3.37491	1	0	22.5817	3.64031	1	0	26.398	3.87454	1	0	33.705	3.86451	1	0	8.60905	2.65784	1	0	16.8528	3.63915	1	0	31.7269	3.93737	1
hsa-miR-1225-5p	0	3093.07	219.172	1	0	1696.87	120.22	1	0	765.525	54.3238	1	0	3277.5	232.204	1	0	1234.23	87.4504	1	0	1186.21	84.1164	1	0	2161.04	153.095	1	0	1639.87	116.128	1
hsa-miR-1226	0	0.1	1	0	0	0.1	1	0	0	0.1	1	0	0	0.1	1	0	0	0.1	1	0	0	0.1	1	0	0	0.1	1	0	0	0.1	1	0
hsa-miR-1226*	0	83.6984	6.80884	1	0	51.3459	4.769	1	0	37.4079	4.20967	1	0	91.2602	7.31703	1	0	30.3361	3.72315	1	0	34.0716	4.29863	1	0	48.5764	4.86633	1	0	29.2891	3.83739	1
hsa-miR-1227	0	0.1	1	0	0	0.1	1	0	0	0.1	1	0	0	0.1	1	0	0	8.45216	1.63181	1	0	0.1	1	0	0	0.1	1	0	0	12.4244	2.10761	1
hsa-miR-1228	0	73.7963	6.32611	1	0	54.9002	5.0009	1	0	48.0693	4.78399	1	0	83.126	6.91733	1	0	49.9589	4.70912	1	0	41.2427	4.62	1	0	51.1051	5.05426	1	0	58.828	5.33727	1
hsa-miR-1228*	0	0.1	1	0	0	0.1	1	0	0	0.1	1	0	0	0.1	1	0	0	0.1	1	0	0	0.1	1	0	0	0.1	1	0	0	0.1	1	0
hsa-miR-1229	0	0.1	1	0	0	0.1	1	0	0	0.1	1	0	0	0.1	1	0	0	22.2446	2.79733	1	0	0.1	1	0	0	0.1	1	0	0	19.2745	2.8675	1
hsa-miR-1231	0	0.1	1	0	0	0.1	1	0	0	0.1	1	0	0	0.1	1	0	0	0.1	1	0	0	0.1	1	0	0	0.1	1	0	0	0.1	1	0
hsa-miR-1233	0	0.1	1	0	0	0.1	1	0	0	0.1	1	0	0	0.1	1	0	0	0.1	1	0	0	0.1	1	0	0	0.1	1	0	0	0.1	1	0
hsa-miR-1234	0	47.4319	4.75705	1	0	33.4357	3.89815	1	0	31.9566	3.98173	1	0	56.6448	5.28265	1	0	43.1095	4.30724	1	0	27.8593	4.06637	1	0	31.5401	4.11377	1	0	43.3546	4.4595	1
hsa-miR-1236	0	0.1	1	0	0	0.1	1	0	0	0.1	1	0	0	0.1	1	0	0	0.1	1	0	0	0.1	1	0	0	0.1	1	0	0	0.1	1	0
hsa-miR-1237	0	7.8996	2.49023	1	0	0.1	1	0	0	15.0565	3.4414	1	0	16.592	3.58568	1	0	27.2009	3.5958	1	0	0.1	1	0	0	0.1	1	0	0	27.2912	3.766	1
hsa-miR-1238	0	20.1513	2.57039	1	0	18.1156	2.35986	1	0	21.4654	2.54659	1	0	22.8209	2.65972	1	0	25.361	2.4934	1	0	12.7328	2.29736	1	0	12.1283	2.21544	1	0	24.8429	2.59976	1
hsa-miR-124	0	0.1	1	0	0	0.1	1	0	0	0.1	1	0	0	0.1	1	0	0	59.0587	5.17323	1	0	0.1	1	0	0	0.1	1	0	0	0.1	1	0
hsa-miR-124*	0	0.1	1	0	0	0.1	1	0	0	0.1	1	0	0	0.1	1	0	0	0.1	1	0	0	0.1	1	0	0	0.1	1	0	0	0.1	1	0
hsa-miR-1243	0	0.1	1	0	0	0.1	1	0	0	0.1	1	0	0	0.1	1	0	0	0.1	1	0	0	0.1	1	0	0	0.1	1	0	0	0.1	1	0
hsa-miR-1244	0	0.1	1	0	0	0.1	1	0	0	27.5051	3.90048	1	0	8.40304	2.53586	1	0	0.1	1	0	0	0.1	1	0	0	0.1	1	0	0	0.1	1	0
hsa-miR-1245	0	0.1	1	0	0	0.1	1	0	0	0.1	1	0	0	0.1	1	0	0	0.1	1	0	0	0.1	1	0	0	0.1	1	0	0	0.1	1	0
hsa-miR-1246	0	5320.58	513.574	1	0	2538.62	247.446	1	0	1943.57	190.386	1	0	5297.81	511.089	1	0	415.42	40.7863	1	0	1778.6	172.635	1	0	1835.69	179.073	1	0	388.169	37.8521	1
hsa-miR-1247	0	0.1	1	0	0	0.1	1	0	0	0.1	1	0	0	0.1	1	0	0	0.1	1	0	0	0.1	1	0	0	0.1	1	0	0	0.1	1	0
hsa-miR-1248	0	0.1	1	0	0	0.1	1	0	0	0.1	1	0	0	0.1	1	0	0	0.1	1	0	0	0.1	1	0	0	0.1	1	0	0	0.1	1	0
hsa-miR-1249	0	166.526	12.3384	1	0	104.21	8.02842	1	0	103.479	8.05098	1	0	194.423	14.2387	1	0	98.2212	7.61854	1	0	81.312	6.80851	1	0	114.348	8.84435	1	0	124.664	9.45593	1
hsa-miR-1250	0	0.1	1	0	0	0.1	1	0	0	0.1	1	0	0	0.1	1	0	0	0.1	1	0	0	0.1	1	0	0	0.1	1	0	0	0.1	1	0
hsa-miR-1251	0	0.1	1	0	0	0.1	1	0	0	0.1	1	0	0	0.1	1	0	0	0.1	1	0	0	0.1	1	0	0	0.1	1	0	0	0.1	1	0
hsa-miR-1252	0	0.1	1	0	0	0.1	1	0	0	0.1	1	0	0	0.1	1	0	0	0.1	1	0	0	0.1	1	0	0	0.1	1	0	0	0.1	1	0
hsa-miR-1253	0	0.1	1	0	0	0.1	1	0	0	0.1	1	0	0	0.1	1	0	0	0.1	1	0	0	0.1	1	0	0	0.1	1	0	0	0.1	1	0
hsa-miR-1254	0	0.1	1	0	0	0.1	1	0	0	0.1	1	0	0	0.1	1	0	0	0.1	1	0	0	0.1	1	0	0	0.1	1	0	0	0.1	1	0
hsa-miR-1255a	0	0.1	1	0	0	0.1	1	0	0	0.1	1	0	0	0.1	1	0	0	0.1	1	0	0	0.1	1	0	0	0.1	1	0	0	0.1	1	0
hsa-miR-1255b	0	0.1	1	0	0	0.1	1	0	0	0.1	1	0	0	0.1	1	0	0	0.1	1	0	0	0.1	1	0	0	0.1	1	0	0	0.1	1	0
hsa-miR-1256	0	0.1	1	0	0	0.1	1	0	0	0.1	1	0	0	0.1	1	0	0	0.1	1	0	0	0.1	1	0	0	0.1	1	0	0	0.1	1	0
hsa-miR-1257	0	0.1	1	0	0	0.1	1	0	0	0.1	1	0	0	0.1	1	0	0	0.1	1	0	0	0.1	1	0	0	0.1	1	0	0	0.1	1	0
hsa-miR-1258	0	0.1	1	0	0	0.1	1	0	0	0.1	1	0	0	0.1	1	0	0	0.1	1	0	0	0.1	1	0	0	0.1	1	0	0	0.1	1	0
hsa-miR-125a-3p	0	137.176	9.45232	1	0	111.062	7.77887	1	0	88.0508	6.129	1	0	81.7995	5.91854	1	0	48.8032	3.90871	1	0	179.485	12.8984	1	0	128.231	9.2705	1	0	170.611	12.4138	1
hsa-miR-125a-5p	0	172.11	14.4188	1	0	31.2492	3.97623	1	0	406.175	34.0088	1	0	50.6727	5.39414	1	0	290.842	24.8454	1	0	93.1193	8.52264	1	0	162.042	13.8812	1	0	18.2745	2.92501	1
hsa-miR-125b	0	344.66	32.246	1	0	73.879	7.7153	1	0	5815.84	547.175	1	0	194.519	18.4841	1	0	11121.2	1045.04	1	0	729.905	67.7586	1	0	1512.75	140.862	1	0	256.136	24.3116	1
hsa-miR-125b-1*	0	0.1	1	0	0	0.1	1	0	0	0.1	1	0	0	0.1	1	0	0	0.1	1	0	0	0.1	1	0	0	0.1	1	0	0	0.1	1	0
hsa-miR-125b-2*	0	0.1	1	0	0	0.1	1	0	0	0.1	1	0	0	0.1	1	0	0	54.3797	5.16439	1	0	0.1	1	0	0	0.1	1	0	0	0.1	1	0
hsa-miR-126	0	2158.2	174.433	1	0	759.377	60.3596	1	0	1381.85	113.458	1	0	982.556	78.7716	1	0	3079.01	251.415	1	0	1055.15	84.0288	1	0	1320.63	106.073	1	0	361.703	29.5577	1
hsa-miR-126*	0	44.2102	5.0275	1	0	15.8169	2.69928	1	0	24.2032	3.35302	1	0	20.2572	3.14437	1	0	43.2126	4.72174	1	0	20.0413	3.21923	1	0	25.0836	3.50657	1	0	0.1	1	0
hsa-miR-1260	0	517.084	47.5733	1	0	758.67	69.9386	1	0	535.655	49.3903	1	0	84.8389	8.81706	1	0	203.52	18.9798	1	0	383.123	35.4767	1	0	573.136	52.8708	1	0	175.757	16.3132	1
hsa-miR-1260b	0	131.597	11.8221	1	0	327.082	28.6934	1	0	727.105	64.1552	1	0	67.71	6.91912	1	0	93.2599	8.57504	1	0	133.627	12.1602	1	0	188.814	16.8299	1	0	76.2198	7.21199	1
hsa-miR-1261	0	0.1	1	0	0	0.1	1	0	0	0.1	1	0	0	0.1	1	0	0	0.1	1	0	0	0.1	1	0	0	0.1	1	0	0	0.1	1	0
hsa-miR-1262	0	0.1	1	0	0	0.1	1	0	0	0.1	1	0	0	0.1	1	0	0	0.1	1	0	0	0.1	1	0	0	0.1	1	0	0	0.1	1	0
hsa-miR-1263	0	0.1	1	0	0	0.1	1	0	0	0.1	1	0	0	0.1	1	0	0	0.1	1	0	0	0.1	1	0	0	0.1	1	0	0	0.1	1	0
hsa-miR-1264	0	0.1	1	0	0	0.1	1	0	0	0.1	1	0	0	0.1	1	0	0	0.1	1	0	0	0.1	1	0	0	0.1	1	0	0	0.1	1	0
hsa-miR-1265	0	0.1	1	0	0	0.1	1	0	0	0.1	1	0	0	0.1	1	0	0	0.1	1	0	0	0.1	1	0	0	0.1	1	0	0	0.1	1	0
hsa-miR-1266	0	0.1	1	0	0	0.1	1	0	0	0.1	1	0	0	0.1	1	0	0	0.1	1	0	0	0.1	1	0	0	0.1	1	0	0	0.1	1	0
hsa-miR-1267	0	0.1	1	0	0	0.1	1	0	0	0.1	1	0	0	0.1	1	0	0	15.3866	3.22337	1	0	0.1	1	0	0	0.1	1	0	0	7.83052	2.4164	1
hsa-miR-1268	0	1504.9	113.886	1	0	725.261	55.8178	1	0	507.492	37.6219	1	0	1683.8	136.076	1	0	427.651	30.6586	1	0	665.022	49.3238	1	0	687	48.9007	1	0	556.469	40.2772	1
hsa-miR-1269	0	0.1	1	0	0	0.1	1	0	0	0.1	1	0	0	0.1	1	0	0	0.1	1	0	0	0.1	1	0	0	0.1	1	0	0	0.1	1	0
hsa-miR-127-3p	0	30.6734	4.13146	1	0	15.6657	2.68333	1	0	42.2977	4.70609	1	0	16.5427	2.91199	1	0	484.475	38.2547	1	0	53.21	5.55306	1	0	64.712	6.15383	1	0	49.6501	5.0708	1
hsa-miR-127-5p	0	0.1	1	0	0	0.1	1	0	0	4.50639	1.24114	1	0	0.1	1	0	0	0.1	1	0	0	0.1	1	0	0	0.1	1	0	0	0.1	1	0
hsa-miR-1270	0	0.1	1	0	0	0.1	1	0	0	0.1	1	0	0	0.1	1	0	0	0.1	1	0	0	0.1	1	0	0	0.1	1	0	0	0.1	1	0
hsa-miR-1271	0	0.1	1	0	0	0.1	1	0	0	0.1	1	0	0	0.1	1	0	0	16.0363	2.6879	1	0	0.1	1	0	0	0.1	1	0	0	0.1	1	0
hsa-miR-1272	0	0.1	1	0	0	0.1	1	0	0	0.1	1	0	0	0.1	1	0	0	0.1	1	0	0	0.1	1	0	0	0.1	1	0	0	0.1	1	0
hsa-miR-1273	0	0.1	1	0	0	0.1	1	0	0	0.1	1	0	0	0.1	1	0	0	0.1	1	0	0	0.1	1	0	0	0.1	1	0	0	0.1	1	0
hsa-miR-1273c	0	0.1	1	0	0	0.1	1	0	0	0.1	1	0	0	0.1	1	0	0	0.1	1	0	0	0.1	1	0	0	0.1	1	0	0	14.9626	2.35413	1
hsa-miR-1273d	0	8.38328	2.50304	1	0	0.1	1	0	0	0.1	1	0	0	0.1	1	0	0	0.1	1	0	0	0.1	1	0	0	0.1	1	0	0	0.1	1	0
hsa-miR-1273e	0	31.1955	3.30197	1	0	9.34773	1.69919	1	0	33.4918	3.39826	1	0	14.1099	2.10396	1	0	7.50777	1.58203	1	0	13.998	2.14893	1	0	26.1531	3.08451	1	0	13.4326	2.0069	1
hsa-miR-1274a	0	150.547	12.7736	1	0	331.836	27.2525	1	0	218.989	18.3029	1	0	20.4483	3.1528	1	0	43.2314	4.73861	1	0	17.9873	3.09094	1	0	48.0304	5.33642	1	0	23.9081	3.30764	1
hsa-miR-1274b	0	1762.13	129.801	1	0	1817.3	134.273	1	0	1758.08	129.352	1	0	344.544	25.5588	1	0	631.747	46.6543	1	0	341.985	25.2711	1	0	737.027	54.3233	1	0	440.733	32.5226	1
hsa-miR-1275	0	508.071	42.5222	1	0	282.465	24.863	1	0	236.962	18.462	1	0	261.302	22.5828	1	0	273.846	22.897	1	0	430.243	38.1761	1	0	344.117	27.4578	1	0	560.57	50.3567	1
hsa-miR-1276	0	0.1	1	0	0	0.1	1	0	0	0.1	1	0	0	0.1	1	0	0	0.1	1	0	0	0.1	1	0	0	0.1	1	0	0	0.1	1	0
hsa-miR-1277	0	0.1	1	0	0	0.1	1	0	0	0.1	1	0	0	0.1	1	0	0	0.1	1	0	0	0.1	1	0	0	0.1	1	0	0	0.1	1	0
hsa-miR-1278	0	0.1	1	0	0	0.1	1	0	0	0.1	1	0	0	0.1	1	0	0	0.1	1	0	0	0.1	1	0	0	0.1	1	0	0	0.1	1	0
hsa-miR-1279	0	0.1	1	0	0	0.1	1	0	0	0.1	1	0	0	0.1	1	0	0	0.1	1	0	0	0.1	1	0	0	0.1	1	0	0	0.1	1	0
hsa-miR-128	0	118.962	10.0092	1	0	69.2906	6.23141	1	0	90.1785	7.90657	1	0	119.531	10.0154	1	0	81.2609	7.11379	1	0	55.4649	5.65399	1	0	91.6275	7.99251	1	0	11.9546	2.58396	1
hsa-miR-1280	0	179.813	15.883	1	0	161.12	14.2806	1	0	320.702	28.2764	1	0	96.4616	8.65897	1	0	47.0622	4.71503	1	0	94.3257	8.65479	1	0	122.01	10.3971	1	0	70.1866	6.45365	1
hsa-miR-1281	0	8.57058	2.51532	1	0	10.3795	2.41694	1	0	7.53018	2.42766	1	0	10.0252	2.60388	1	0	18.2367	3.29934	1	0	0.1	1	0	0	0.1	1	0	0	18.1255	3.47721	1
hsa-miR-1282	0	0.1	1	0	0	0.1	1	0	0	0.1	1	0	0	0.1	1	0	0	0.1	1	0	0	0.1	1	0	0	0.1	1	0	0	0.1	1	0
hsa-miR-1283	0	0.1	1	0	0	0.1	1	0	0	0.1	1	0	0	0.1	1	0	0	0.1	1	0	0	0.1	1	0	0	0.1	1	0	0	0.1	1	0
hsa-miR-1284	0	0.1	1	0	0	0.1	1	0	0	0.1	1	0	0	0.1	1	0	0	0.1	1	0	0	0.1	1	0	0	0.1	1	0	0	0.1	1	0
hsa-miR-1285	0	8.87557	2.52267	1	0	0.1	1	0	0	8.16651	2.4515	1	0	0.1	1	0	0	0.1	1	0	0	0.1	1	0	0	0.1	1	0	0	0.1	1	0
hsa-miR-1286	0	0.1	1	0	0	0.1	1	0	0	0.1	1	0	0	0.1	1	0	0	0.1	1	0	0	0.1	1	0	0	0.1	1	0	0	0.1	1	0
hsa-miR-1287	0	0.1	1	0	0	0.1	1	0	0	0.1	1	0	0	0.1	1	0	0	0.1	1	0	0	25.2267	3.97875	1	0	0.1	1	0	0	0.1	1	0
hsa-miR-1288	0	30.7499	3.98346	1	0	23.419	3.52436	1	0	18.9327	3.54193	1	0	19.6201	3.66686	1	0	18.8825	3.31985	1	0	19.3356	3.80952	1	0	21.8984	3.78595	1	0	0.1	1	0
hsa-miR-1289	0	0.1	1	0	0	0.1	1	0	0	0.1	1	0	0	0.1	1	0	0	0.1	1	0	0	0.1	1	0	0	0.1	1	0	0	0.1	1	0
hsa-miR-129*	0	0.1	1	0	0	0.1	1	0	0	8.32946	2.46133	1	0	0.1	1	0	0	21.9603	3.43634	1	0	0.1	1	0	0	0.1	1	0	0	11.7824	2.56816	1
hsa-miR-129-3p	0	0.1	1	0	0	0.1	1	0	0	9.08614	2.47985	1	0	0.1	1	0	0	40.4411	4.26922	1	0	11.8108	2.77881	1	0	12.9951	2.7575	1	0	20.5632	3.56683	1
hsa-miR-129-5p	0	0.1	1	0	0	0.1	1	0	0	0.1	1	0	0	0.1	1	0	0	0.1	1	0	0	0.1	1	0	0	0.1	1	0	0	0.1	1	0
hsa-miR-1290	0	1275.66	123.179	1	0	625.066	61.4374	1	0	158.655	16.0452	1	0	1719.01	167.166	1	0	21.286	3.02797	1	0	208.024	20.9658	1	0	145.819	14.807	1	0	33.719	4.07561	1
hsa-miR-1291	0	10.4339	2.58264	1	0	0.1	1	0	0	0.1	1	0	0	0.1	1	0	0	0.1	1	0	0	9.59494	2.68756	1	0	0.1	1	0	0	0.1	1	0
hsa-miR-1292	0	0.1	1	0	0	0.1	1	0	0	0.1	1	0	0	0.1	1	0	0	0.1	1	0	0	0.1	1	0	0	0.1	1	0	0	0.1	1	0
hsa-miR-1293	0	0.1	1	0	0	0.1	1	0	0	0.1	1	0	0	0.1	1	0	0	0.1	1	0	0	0.1	1	0	0	0.1	1	0	0	0.1	1	0
hsa-miR-1294	0	0.1	1	0	0	0.1	1	0	0	0.1	1	0	0	0.1	1	0	0	0.1	1	0	0	0.1	1	0	0	0.1	1	0	0	0.1	1	0
hsa-miR-1295	0	0.1	1	0	0	0.1	1	0	0	0.1	1	0	0	0.1	1	0	0	0.1	1	0	0	0.1	1	0	0	0.1	1	0	0	0.1	1	0
hsa-miR-1296	0	0.1	1	0	0	0.1	1	0	0	0.1	1	0	0	0.1	1	0	0	0.1	1	0	0	0.1	1	0	0	0.1	1	0	0	0.1	1	0
hsa-miR-1297	0	0.1	1	0	0	0.1	1	0	0	0.1	1	0	0	0.1	1	0	0	0.1	1	0	0	0.1	1	0	0	0.1	1	0	0	0.1	1	0
hsa-miR-1298	0	0.1	1	0	0	0.1	1	0	0	0.1	1	0	0	0.1	1	0	0	0.1	1	0	0	0.1	1	0	0	0.1	1	0	0	0.1	1	0
hsa-miR-1299	0	20.7345	3.65006	1	0	0.1	1	0	0	7.65594	2.43499	1	0	0.1	1	0	0	7.63319	2.27905	1	0	0.1	1	0	0	17.1632	3.65391	1	0	0.1	1	0
hsa-miR-1301	0	0.1	1	0	0	0.1	1	0	0	0.1	1	0	0	0.1	1	0	0	0.1	1	0	0	0.1	1	0	0	0.1	1	0	0	0.1	1	0
hsa-miR-1302	0	0.1	1	0	0	0.1	1	0	0	0.1	1	0	0	0.1	1	0	0	0.1	1	0	0	0.1	1	0	0	0.1	1	0	0	0.1	1	0
hsa-miR-1303	0	0.1	1	0	0	0.1	1	0	0	0.1	1	0	0	0.1	1	0	0	0.1	1	0	0	0.1	1	0	0	0.1	1	0	0	0.1	1	0
hsa-miR-1304	0	0.1	1	0	0	0.1	1	0	0	0.1	1	0	0	0.1	1	0	0	0.1	1	0	0	0.1	1	0	0	0.1	1	0	0	0.1	1	0
hsa-miR-1305	0	93.2968	7.43653	1	0	77.1075	6.28976	1	0	59.2421	5.33152	1	0	66.1961	5.79021	1	0	60.9338	5.32025	1	0	66.2401	5.8904	1	0	75.8758	6.39586	1	0	55.1852	5.07819	1
hsa-miR-1306	0	0.1	1	0	0	0.1	1	0	0	0.1	1	0	0	0.1	1	0	0	0.1	1	0	0	0.1	1	0	0	0.1	1	0	0	0.1	1	0
hsa-miR-1307	0	11.0626	2.61164	1	0	7.43978	2.30899	1	0	9.06865	2.49286	1	0	12.939	2.72407	1	0	11.2866	2.42847	1	0	0.1	1	0	0	8.706	2.58107	1	0	9.73235	2.4846	1
hsa-miR-130a	0	436.39	31.4656	1	0	141.361	10.573	1	0	314.423	23.0574	1	0	204.324	15.0471	1	0	1956.84	141.661	1	0	406.183	29.3317	1	0	675.708	48.5174	1	0	203.346	15.0033	1
hsa-miR-130a*	0	0.1	1	0	0	0.1	1	0	0	0.1	1	0	0	0.1	1	0	0	0.1	1	0	0	0.1	1	0	0	0.1	1	0	0	0.1	1	0
hsa-miR-130b	0	388.34	29.2611	1	0	130.775	10.1629	1	0	464.675	35.2244	1	0	297.518	22.5388	1	0	68.2613	6.02342	1	0	94.4848	7.88958	1	0	94.8354	7.93358	1	0	70.6809	6.21521	1
hsa-miR-130b*	0	0.1	1	0	0	0.1	1	0	0	0.1	1	0	0	0.1	1	0	0	0.1	1	0	0	0.1	1	0	0	0.1	1	0	0	0.1	1	0
hsa-miR-132	0	70.0446	6.32122	1	0	31.2577	3.88048	1	0	305.599	23.5144	1	0	130.271	10.2833	1	0	96.5526	7.90178	1	0	53.5187	5.35865	1	0	61.8896	5.82433	1	0	23.9449	3.69161	1
hsa-miR-132*	0	0.1	1	0	0	0.1	1	0	0	35.8958	4.27028	1	0	12.1512	2.6841	1	0	12.9809	2.51085	1	0	0.1	1	0	0	0.1	1	0	0	0.1	1	0
hsa-miR-1321	0	8.2155	2.50377	1	0	0.1	1	0	0	8.77346	2.46875	1	0	0.1	1	0	0	0.1	1	0	0	0.1	1	0	0	7.78581	2.54967	1	0	0.1	1	0
hsa-miR-1322	0	0.1	1	0	0	0.1	1	0	0	0.1	1	0	0	0.1	1	0	0	0.1	1	0	0	0.1	1	0	0	0.1	1	0	0	0.1	1	0
hsa-miR-1323	0	0.1	1	0	0	0.1	1	0	0	0.1	1	0	0	0.1	1	0	0	0.1	1	0	0	0.1	1	0	0	0.1	1	0	0	0.1	1	0
hsa-miR-1324	0	0.1	1	0	0	0.1	1	0	0	0.1	1	0	0	0.1	1	0	0	0.1	1	0	0	0.1	1	0	0	0.1	1	0	0	0.1	1	0
hsa-miR-133a	0	0.1	1	0	0	0.1	1	0	0	0.1	1	0	0	0.1	1	0	0	77.3996	6.90753	1	0	12.1499	2.78995	1	0	19.3976	3.11265	1	0	0.1	1	0
hsa-miR-133b	0	44.1778	5.02001	1	0	8.317	2.33806	1	0	8.08249	2.44747	1	0	8.40228	2.5404	1	0	785.377	69.957	1	0	166.691	15.008	1	0	270.049	23.9983	1	0	62.432	6.31079	1
hsa-miR-134	0	507.861	36.0887	1	0	306.491	21.9113	1	0	130.961	9.82661	1	0	679.38	48.165	1	0	158.719	11.6513	1	0	206.739	15.0596	1	0	245.584	17.7225	1	0	142.148	10.5752	1
hsa-miR-135a	0	0.1	1	0	0	0.1	1	0	0	0.1	1	0	0	0.1	1	0	0	0.1	1	0	0	0.1	1	0	0	0.1	1	0	0	0.1	1	0
hsa-miR-135a*	0	68.25	4.88527	1	0	53.3514	3.69799	1	0	17.1605	2.03822	1	0	56.1481	4.27548	1	0	31.4906	2.72114	1	0	15.2209	2.08281	1	0	29.9374	2.74449	1	0	68.1114	4.11958	1
hsa-miR-135b	0	1590.42	114.166	1	0	87.1256	6.95988	1	0	300.266	21.9049	1	0	853.276	61.2371	1	0	31.7205	3.80254	1	0	18.3387	3.77984	1	0	50.1528	4.9835	1	0	0.1	1	0
hsa-miR-135b*	0	0.1	1	0	0	0.1	1	0	0	0.1	1	0	0	0.1	1	0	0	0.1	1	0	0	0.1	1	0	0	0.1	1	0	0	0.1	1	0
hsa-miR-136	0	9.37285	2.54354	1	0	0.1	1	0	0	9.70593	2.50937	1	0	0.1	1	0	0	123.014	10.1024	1	0	8.714	2.66108	1	0	10.2534	2.63673	1	0	10.7005	2.52273	1
hsa-miR-136*	0	0.1	1	0	0	0.1	1	0	0	0.1	1	0	0	0.1	1	0	0	57.8791	5.39353	1	0	0.1	1	0	0	0.1	1	0	0	0.1	1	0
hsa-miR-137	0	0.1	1	0	0	0.1	1	0	0	0.1	1	0	0	0.1	1	0	0	8.13863	2.29803	1	0	0.1	1	0	0	0.1	1	0	0	0.1	1	0
hsa-miR-138	0	0.1	1	0	0	0.1	1	0	0	0.1	1	0	0	0.1	1	0	0	0.1	1	0	0	0.1	1	0	0	0.1	1	0	0	0.1	1	0
hsa-miR-138-1*	0	0.1	1	0	0	0.1	1	0	0	0.1	1	0	0	0.1	1	0	0	0.1	1	0	0	0.1	1	0	0	0.1	1	0	0	0.1	1	0
hsa-miR-138-2*	0	0.1	1	0	0	0.1	1	0	0	0.1	1	0	0	0.1	1	0	0	0.1	1	0	0	0.1	1	0	0	0.1	1	0	0	0.1	1	0
hsa-miR-139-3p	0	9.78342	2.56815	1	0	7.25721	2.30558	1	0	14.237	2.73041	1	0	10.6904	2.62455	1	0	20.1984	2.95227	1	0	16.9871	3.03104	1	0	31.8147	4.01929	1	0	11.3928	2.55462	1
hsa-miR-139-5p	0	0.1	1	0	0	0.1	1	0	0	0.1	1	0	0	0.1	1	0	0	131.676	11.5996	1	0	17.8759	3.08631	1	0	28.263	3.74396	1	0	7.43127	2.39982	1
hsa-miR-140-3p	0	158.867	13.4521	1	0	102.847	8.96658	1	0	175.614	14.7536	1	0	201.248	16.8114	1	0	612.527	49.6472	1	0	241.164	19.8845	1	0	296.125	24.4596	1	0	166.78	13.6401	1
hsa-miR-140-5p	0	163.005	12.1353	1	0	86.5565	6.91791	1	0	192.88	14.1767	1	0	182.9	13.5303	1	0	360.586	26.0137	1	0	139.484	10.5825	1	0	178.376	13.2368	1	0	51.3995	4.91575	1
hsa-miR-141	0	5860.11	491.882	1	0	3481.11	280.387	1	0	19.1424	3.01044	1	0	2663.33	226.082	1	0	1022.4	89.3971	1	0	1839.82	152.152	1	0	3410.29	287.185	1	0	2349.56	192.295	1
hsa-miR-141*	0	25.7288	2.58042	1	0	23.3498	2.39668	1	0	0.1	1	0	0	28.1925	2.73068	1	0	4.19667	1.15452	1	0	5.59797	1.37367	1	0	14.6873	2.01423	1	0	0.1	1	0
hsa-miR-142-3p	0	1198.62	90.7246	1	0	914.947	69.1746	1	0	1517.3	115.082	1	0	1564.99	118.726	1	0	618.715	46.9914	1	0	729.281	55.1557	1	0	744.778	56.3756	1	0	297.523	22.7003	1
hsa-miR-142-5p	0	82.1966	6.7123	1	0	78.8713	6.38603	1	0	134.572	10.0734	1	0	104.466	8.13876	1	0	53.7762	4.88232	1	0	32.9575	4.25002	1	0	42.7379	4.5906	1	0	39.6338	4.27833	1
hsa-miR-143	0	215.311	20.9845	1	0	64.163	6.79938	1	0	55.0393	5.97181	1	0	67.0427	7.12891	1	0	1447.44	139.346	1	0	312.593	30.4061	1	0	511.266	49.5761	1	0	87.1375	9.0168	1
hsa-miR-143*	0	7.67882	2.4819	1	0	0.1	1	0	0	0.1	1	0	0	0.1	1	0	0	79.3012	6.7502	1	0	10.1323	2.70729	1	0	14.0938	2.81037	1	0	8.37918	2.43205	1
hsa-miR-144	0	332.638	23.8438	1	0	117.705	8.89382	1	0	26.7844	3.79553	1	0	123.683	9.42431	1	0	78.1233	6.32821	1	0	8.02634	2.64471	1	0	8.3101	2.56588	1	0	0.1	1	0
hsa-miR-144*	0	55.0238	5.86338	1	0	9.99297	2.39697	1	0	8.94342	2.47569	1	0	20.7536	3.16901	1	0	19.7668	2.93063	1	0	8.31567	2.64908	1	0	0.1	1	0	0	0.1	1	0
hsa-miR-145	0	744.953	65.1817	1	0	248.133	21.6936	1	0	187.214	16.7255	1	0	241.505	21.3983	1	0	11089.9	944.141	1	0	2463.29	213.869	1	0	3906.26	339.564	1	0	1263.84	106.049	1
hsa-miR-145*	0	18.2014	2.98856	1	0	7.4621	2.30499	1	0	9.81096	2.51436	1	0	9.27622	2.56624	1	0	212.822	18.2331	1	0	65.2517	6.47816	1	0	102.44	9.17709	1	0	12.4145	2.60646	1
hsa-miR-1468	0	0.1	1	0	0	0.1	1	0	0	0.1	1	0	0	0.1	1	0	0	0.1	1	0	0	0.1	1	0	0	0.1	1	0	0	0.1	1	0
hsa-miR-1469	0	15.1773	2.81156	1	0	10.5576	2.42757	1	0	0.1	1	0	0	10.7731	2.6287	1	0	0.1	1	0	0	0.1	1	0	0	0.1	1	0	0	7.56526	2.40669	1
hsa-miR-146a	0	354.019	30.7508	1	0	1037.59	88.6166	1	0	548.849	48.1462	1	0	1169.25	100.599	1	0	80.3375	7.73938	1	0	213.209	18.9043	1	0	442.063	38.3401	1	0	126.722	11.4429	1
hsa-miR-146a*	0	0.1	1	0	0	0.1	1	0	0	0.1	1	0	0	0.1	1	0	0	0.1	1	0	0	0.1	1	0	0	0.1	1	0	0	0.1	1	0
hsa-miR-146b-3p	0	0.1	1	0	0	0.1	1	0	0	0.1	1	0	0	0.1	1	0	0	0.1	1	0	0	0.1	1	0	0	0.1	1	0	0	0.1	1	0
hsa-miR-146b-5p	0	143.406	12.7813	1	0	142.428	12.6104	1	0	539.488	46.8135	1	0	309.049	26.5998	1	0	197.691	17.3806	1	0	204.618	17.7461	1	0	226.535	19.5285	1	0	70.9763	6.90135	1
hsa-miR-147	0	0.1	1	0	0	0.1	1	0	0	0.1	1	0	0	0.1	1	0	0	0.1	1	0	0	0.1	1	0	0	0.1	1	0	0	0.1	1	0
hsa-miR-1470	0	0.1	1	0	0	0.1	1	0	0	0.1	1	0	0	0.1	1	0	0	7.17689	2.25897	1	0	0.1	1	0	0	0.1	1	0	0	7.27323	2.39312	1
hsa-miR-1471	0	51.2918	4.9388	1	0	7.75726	2.31578	1	0	48.3946	4.78057	1	0	20.4734	3.68971	1	0	8.06485	2.29234	1	0	21.4936	3.87312	1	0	40.6397	4.503	1	0	23.6213	3.64223	1
hsa-miR-147b	0	0.1	1	0	0	7.0066	1.29624	1	0	0.1	1	0	0	0.1	1	0	0	0.1	1	0	0	0.1	1	0	0	0.1	1	0	0	4.23244	1.21801	1
hsa-miR-148a	0	3052.61	223.837	1	0	1815.37	132.22	1	0	262.501	19.7222	1	0	3441.72	250.98	1	0	457.068	33.7907	1	0	742.095	54.2805	1	0	2518.67	183.864	1	0	259.085	19.3999	1
hsa-miR-148a*	0	0.1	1	0	0	3.92053	1.15951	1	0	0.1	1	0	0	5.05128	1.30173	1	0	0.1	1	0	0	0.1	1	0	0	4.30433	1.28907	1	0	0.1	1	0
hsa-miR-148b	0	187.692	17.4362	1	0	82.2829	8.0844	1	0	70.8761	7.47101	1	0	126.367	12.05	1	0	107.675	10.3918	1	0	62.7381	6.76105	1	0	127.739	12.1989	1	0	20.1472	3.04922	1
hsa-miR-148b*	0	0.1	1	0	0	0.1	1	0	0	0.1	1	0	0	0.1	1	0	0	0.1	1	0	0	0.1	1	0	0	0.1	1	0	0	0.1	1	0
hsa-miR-149	0	7.78584	2.48805	1	0	0.1	1	0	0	19.8871	3.56396	1	0	7.90223	2.52092	1	0	35.4373	4.10342	1	0	11.7382	2.77113	1	0	18.7383	3.06937	1	0	19.2382	3.51335	1
hsa-miR-149*	0	17.2504	2.128	1	0	4.34867	1.17322	1	0	6.01261	1.30317	1	0	6.09046	1.34291	1	0	0.1	1	0	0	5.67141	1.376	1	0	17.5515	2.386	1	0	4.61791	1.2316	1
hsa-miR-150	0	173.596	13.6492	1	0	233.246	17.3366	1	0	279.475	21.4419	1	0	323.697	24.2079	1	0	766.073	58.051	1	0	832.297	61.2821	1	0	815.792	60.8972	1	0	309.044	22.4958	1
hsa-miR-150*	0	200.801	10.5168	1	0	135.01	7.14795	1	0	126.408	7.17477	1	0	215.749	11.1201	1	0	80.2235	4.59335	1	0	97.0861	5.57119	1	0	159.323	8.60097	1	0	68.4341	4.21246	1
hsa-miR-151-3p	0	279.969	21.3459	1	0	98.5826	7.98111	1	0	149.183	11.7386	1	0	137.218	10.8645	1	0	176.592	13.8605	1	0	123.358	9.9755	1	0	145.071	11.6173	1	0	90.6195	7.59858	1
hsa-miR-151-5p	0	806.422	66.3903	1	0	234.443	19.456	1	0	316.271	27.1244	1	0	427.857	35.371	1	0	761.256	64.4851	1	0	486.148	39.6381	1	0	749.569	61.0566	1	0	115.926	10.3099	1
hsa-miR-152	0	25.1785	3.46301	1	0	12.4418	2.50796	1	0	38.3812	4.4796	1	0	15.5179	2.86056	1	0	70.7639	7.40017	1	0	28.13	3.778	1	0	63.8639	6.8381	1	0	14.2931	2.69946	1
hsa-miR-153	0	0.1	1	0	0	0.1	1	0	0	0.1	1	0	0	11.0227	2.65088	1	0	0.1	1	0	0	0.1	1	0	0	0.1	1	0	0	0.1	1	0
hsa-miR-1537	0	0.1	1	0	0	0.1	1	0	0	0.1	1	0	0	0.1	1	0	0	0.1	1	0	0	0.1	1	0	0	0.1	1	0	0	0.1	1	0
hsa-miR-1538	0	0.1	1	0	0	0.1	1	0	0	0.1	1	0	0	0.1	1	0	0	0.1	1	0	0	0.1	1	0	0	0.1	1	0	0	0.1	1	0
hsa-miR-1539	0	0.1	1	0	0	0.1	1	0	0	18.4088	3.51856	1	0	0.1	1	0	0	25.8646	3.53992	1	0	0.1	1	0	0	7.65746	2.54566	1	0	21.2823	3.56645	1
hsa-miR-154	0	8.28596	2.5018	1	0	0.1	1	0	0	10.3679	2.54154	1	0	0.1	1	0	0	84.269	8.05419	1	0	12.21	2.79291	1	0	16.5989	2.94762	1	0	0.1	1	0
hsa-miR-154*	0	0.1	1	0	0	0.1	1	0	0	0.1	1	0	0	0.1	1	0	0	20.7602	3.37127	1	0	0.1	1	0	0	0.1	1	0	0	0.1	1	0
hsa-miR-155	0	171.789	14.5689	1	0	203.556	17.1156	1	0	690.124	58.8289	1	0	208.945	17.5178	1	0	68.3079	6.21271	1	0	180.66	14.8949	1	0	213.275	17.6877	1	0	73.2841	6.41644	1
hsa-miR-155*	0	0.1	1	0	0	0.1	1	0	0	0.1	1	0	0	0.1	1	0	0	0.1	1	0	0	0.1	1	0	0	0.1	1	0	0	0.1	1	0
hsa-miR-15a	0	3188.97	235.592	1	0	797.034	58.5734	1	0	1318.87	97.3912	1	0	1129.89	83.4725	1	0	1007.39	75.1561	1	0	909.475	67.4958	1	0	1283.44	95.5338	1	0	339.193	25.3503	1
hsa-miR-15a*	0	0.1	1	0	0	0.1	1	0	0	0.1	1	0	0	0.1	1	0	0	0.1	1	0	0	0.1	1	0	0	0.1	1	0	0	0.1	1	0
hsa-miR-15b	0	4123.51	303.451	1	0	1691.17	122.825	1	0	3014.06	220.179	1	0	2510.03	182.561	1	0	1733.04	129.422	1	0	1562.25	115.465	1	0	2749.37	203.396	1	0	428.158	31.9239	1
hsa-miR-15b*	0	5.72958	1.30929	1	0	3.61063	1.14841	1	0	3.81798	1.21975	1	0	0.1	1	0	0	0.1	1	0	0	0.1	1	0	0	0.1	1	0	0	0.1	1	0
hsa-miR-16	0	10762.8	837.721	1	0	3324.01	255.789	1	0	5866.01	468.972	1	0	5509.1	425.27	1	0	4980.72	394.576	1	0	4495.58	345.643	1	0	6484.26	503.64	1	0	1305.24	101.55	1
hsa-miR-16-1*	0	0.1	1	0	0	0.1	1	0	0	0.1	1	0	0	0.1	1	0	0	0.1	1	0	0	0.1	1	0	0	0.1	1	0	0	0.1	1	0
hsa-miR-16-2*	0	16.7046	2.04774	1	0	8.99467	1.41556	1	0	15.7197	1.95761	1	0	18.1717	2.17911	1	0	4.79756	1.17445	1	0	7.18685	1.4471	1	0	11.1146	1.64631	1	0	0.1	1	0
hsa-miR-17	0	4376.83	324.954	1	0	1278.31	92.2511	1	0	845.373	65.458	1	0	2138.91	157.046	1	0	435.522	33.4868	1	0	522.945	38.376	1	0	690.911	51.0758	1	0	238.76	18.1003	1
hsa-miR-17*	0	158.995	14.6351	1	0	54.9116	5.92016	1	0	31.3044	3.90434	1	0	114.861	10.9238	1	0	36.7885	4.26589	1	0	21.7346	3.32279	1	0	28.7479	3.77252	1	0	18.3233	2.92437	1
hsa-miR-181a	0	680.33	54.2149	1	0	131.554	10.7229	1	0	314.414	25.6791	1	0	201.902	16.2687	1	0	652.909	52.0667	1	0	365.3	28.529	1	0	380.547	30.0808	1	0	290.956	22.768	1
hsa-miR-181a*	0	0.1	1	0	0	0.1	1	0	0	9.67381	2.50742	1	0	0.1	1	0	0	0.1	1	0	0	0.1	1	0	0	0.1	1	0	0	0.1	1	0
hsa-miR-181a-2*	0	4.72687	1.27362	1	0	0.1	1	0	0	0.1	1	0	0	0.1	1	0	0	4.9652	1.18171	1	0	0.1	1	0	0	4.11454	1.28329	1	0	0.1	1	0
hsa-miR-181b	0	178.002	13.5453	1	0	45.716	4.56962	1	0	124.572	9.85091	1	0	62.2489	5.7038	1	0	177.969	13.3437	1	0	95.1091	7.78022	1	0	85.3048	7.15333	1	0	62.5103	5.55858	1
hsa-miR-181c	0	63.1519	5.8084	1	0	0.1	1	0	0	0.1	1	0	0	30.8945	4.12129	1	0	77.0518	6.3889	1	0	11.9605	2.77804	1	0	29.4017	4.08061	1	0	0.1	1	0
hsa-miR-181c*	0	5.29838	1.29096	1	0	0.1	1	0	0	0.1	1	0	0	0.1	1	0	0	12.2174	1.76581	1	0	0.1	1	0	0	0.1	1	0	0	0.1	1	0
hsa-miR-181d	0	47.4598	5.06809	1	0	0.1	1	0	0	0.1	1	0	0	14.9403	2.83733	1	0	45.6732	4.60663	1	0	10.405	2.72298	1	0	13.2214	2.7677	1	0	8.21867	2.42326	1
hsa-miR-182	0	11.8931	1.67563	1	0	8.00043	1.3563	1	0	5.024	1.27414	1	0	14.8271	1.90663	1	0	0.1	1	0	0	4.77543	1.34579	1	0	4.45815	1.29784	1	0	0.1	1	0
hsa-miR-182*	0	0.1	1	0	0	0.1	1	0	0	0.1	1	0	0	0.1	1	0	0	0.1	1	0	0	0.1	1	0	0	0.1	1	0	0	0.1	1	0
hsa-miR-1825	0	0.1	1	0	0	0.1	1	0	0	7.56436	2.4308	1	0	0.1	1	0	0	18.6146	3.30814	1	0	0.1	1	0	0	0.1	1	0	0	15.9901	3.42717	1
hsa-miR-1827	0	0.1	1	0	0	0.1	1	0	0	0.1	1	0	0	0.1	1	0	0	0.1	1	0	0	0.1	1	0	0	0.1	1	0	0	0.1	1	0
hsa-miR-183	0	140.054	8.84211	1	0	63.8452	4.33513	1	0	91.758	6.08479	1	0	161.526	10.0537	1	0	6.99603	1.59427	1	0	35.3707	3.05466	1	0	42.7147	3.32669	1	0	8.89054	1.73671	1
hsa-miR-183*	0	4.22401	1.26504	1	0	0.1	1	0	0	0.1	1	0	0	0.1	1	0	0	0.1	1	0	0	0.1	1	0	0	0.1	1	0	0	0.1	1	0
hsa-miR-184	0	0.1	1	0	0	0.1	1	0	0	0.1	1	0	0	0.1	1	0	0	0.1	1	0	0	0.1	1	0	0	0.1	1	0	0	0.1	1	0
hsa-miR-185	0	184.937	14.5811	1	0	112.784	9.15797	1	0	164.553	13.4308	1	0	199.889	15.6129	1	0	142.452	11.6296	1	0	99.9891	8.46685	1	0	121.818	9.95506	1	0	51.5893	5.21491	1
hsa-miR-185*	0	0.1	1	0	0	0.1	1	0	0	0.1	1	0	0	0.1	1	0	0	0.1	1	0	0	0.1	1	0	0	0.1	1	0	0	0.1	1	0
hsa-miR-186	0	125.007	10.271	1	0	48.98	4.92166	1	0	55.3015	5.44044	1	0	113.025	9.40572	1	0	130.09	10.5776	1	0	121.301	10.0911	1	0	135.295	11.0892	1	0	57.2661	5.4684	1
hsa-miR-186*	0	0.1	1	0	0	0.1	1	0	0	0.1	1	0	0	0.1	1	0	0	0.1	1	0	0	0.1	1	0	0	0.1	1	0	0	0.1	1	0
hsa-miR-187	0	0.1	1	0	0	0.1	1	0	0	0.1	1	0	0	0.1	1	0	0	0.1	1	0	0	0.1	1	0	0	0.1	1	0	0	0.1	1	0
hsa-miR-187*	0	14.4949	2.21536	1	0	7.29841	1.62572	1	0	0.1	1	0	0	27.0214	2.77368	1	0	8.07919	1.62074	1	0	0.1	1	0	0	13.3598	2.24329	1	0	0.1	1	0
hsa-miR-188-3p	0	0.1	1	0	0	0.1	1	0	0	0.1	1	0	0	0.1	1	0	0	0.1	1	0	0	0.1	1	0	0	0.1	1	0	0	0.1	1	0
hsa-miR-188-5p	0	363.238	25.9931	1	0	140.874	10.4604	1	0	153.959	11.4776	1	0	284.19	20.4148	1	0	126.603	9.47929	1	0	130.036	9.93945	1	0	182.157	13.4104	1	0	268.377	19.3144	1
hsa-miR-18a	0	404.352	32.0602	1	0	151.836	12.3261	1	0	122.563	10.4272	1	0	360.74	28.4208	1	0	20.6438	2.97555	1	0	21.0576	3.27866	1	0	25.8538	3.55234	1	0	11.6521	2.56463	1
hsa-miR-18a*	0	0.1	1	0	0	0.1	1	0	0	0.1	1	0	0	0.1	1	0	0	0.1	1	0	0	0.1	1	0	0	0.1	1	0	0	0.1	1	0
hsa-miR-18b	0	153.43	13.8699	1	0	54.3652	5.24715	1	0	38.8108	4.16867	1	0	137.737	12.5743	1	0	11.3522	1.79586	1	0	10.2597	1.92832	1	0	12.758	2.032	1	0	5.6049	1.58465	1
hsa-miR-18b*	0	0.1	1	0	0	0.1	1	0	0	0.1	1	0	0	0.1	1	0	0	0.1	1	0	0	0.1	1	0	0	0.1	1	0	0	0.1	1	0
hsa-miR-190	0	0.1	1	0	0	0.1	1	0	0	0.1	1	0	0	0.1	1	0	0	0.1	1	0	0	0.1	1	0	0	0.1	1	0	0	0.1	1	0
hsa-miR-1908	0	0.1	1	0	0	0.1	1	0	0	0.1	1	0	0	0.1	1	0	0	0.1	1	0	0	0.1	1	0	0	0.1	1	0	0	0.1	1	0
hsa-miR-1909	0	0.1	1	0	0	0.1	1	0	0	0.1	1	0	0	0.1	1	0	0	0.1	1	0	0	0.1	1	0	0	0.1	1	0	0	0.1	1	0
hsa-miR-1909*	0	9.43622	2.54075	1	0	0.1	1	0	0	15.5791	2.7852	1	0	0.1	1	0	0	0.1	1	0	0	0.1	1	0	0	0.1	1	0	0	0.1	1	0
hsa-miR-190b	0	0.1	1	0	0	0.1	1	0	0	0.1	1	0	0	0.1	1	0	0	0.1	1	0	0	0.1	1	0	0	0.1	1	0	0	0.1	1	0
hsa-miR-191	0	0.1	1	0	0	0.1	1	0	0	0.1	1	0	0	0.1	1	0	0	0.1	1	0	0	0.1	1	0	0	0.1	1	0	0	0.1	1	0
hsa-miR-191*	0	4.04734	1.24821	1	0	15.3359	2.30965	1	0	14.1869	2.16388	1	0	9.12957	1.81385	1	0	20.9404	2.39002	1	0	0.1	1	0	0	0.1	1	0	0	19.3442	2.47893	1
hsa-miR-1910	0	0.1	1	0	0	0.1	1	0	0	0.1	1	0	0	0.1	1	0	0	0.1	1	0	0	0.1	1	0	0	0.1	1	0	0	0.1	1	0
hsa-miR-1911	0	0.1	1	0	0	0.1	1	0	0	0.1	1	0	0	0.1	1	0	0	0.1	1	0	0	0.1	1	0	0	0.1	1	0	0	0.1	1	0
hsa-miR-1911*	0	0.1	1	0	0	0.1	1	0	0	0.1	1	0	0	0.1	1	0	0	0.1	1	0	0	0.1	1	0	0	0.1	1	0	0	0.1	1	0
hsa-miR-1912	0	0.1	1	0	0	0.1	1	0	0	0.1	1	0	0	0.1	1	0	0	0.1	1	0	0	0.1	1	0	0	0.1	1	0	0	0.1	1	0
hsa-miR-1913	0	0.1	1	0	0	0.1	1	0	0	0.1	1	0	0	0.1	1	0	0	0.1	1	0	0	0.1	1	0	0	0.1	1	0	0	0.1	1	0
hsa-miR-1914	0	0.1	1	0	0	0.1	1	0	0	0.1	1	0	0	0.1	1	0	0	0.1	1	0	0	0.1	1	0	0	0.1	1	0	0	0.1	1	0
hsa-miR-1914*	0	173.422	12.7391	1	0	95.9684	7.48866	1	0	99.9247	7.8115	1	0	161.262	11.9323	1	0	66.8262	5.63641	1	0	101.506	8.03098	1	0	117.823	9.0407	1	0	94.9419	7.47283	1
hsa-miR-1915	0	1982.17	140.309	1	0	1115.72	79.0119	1	0	1427.74	101.117	1	0	2291.83	162.224	1	0	1312.97	93.0145	1	0	1413.67	100.052	1	0	1689.53	119.612	1	0	1643.61	116.382	1
hsa-miR-1915*	0	0.1	1	0	0	0.1	1	0	0	0.1	1	0	0	0.1	1	0	0	0.1	1	0	0	0.1	1	0	0	0.1	1	0	0	0.1	1	0
hsa-miR-192	0	12092.9	936.749	1	0	7477.88	576.918	1	0	131.87	10.9576	1	0	4467.91	348.635	1	0	3703.12	290.379	1	0	12092.4	943.997	1	0	21489.2	1674.67	1	0	2850.95	225.38	1
hsa-miR-192*	0	210.754	17.3746	1	0	169.96	13.9176	1	0	0.1	1	0	0	68.3722	6.5148	1	0	44.4543	4.83477	1	0	217.118	17.8365	1	0	352.51	28.7947	1	0	63.0403	6.11842	1
hsa-miR-193a-3p	0	182.784	16.6006	1	0	46.3929	5.13405	1	0	77.0276	7.72447	1	0	146.219	13.4819	1	0	389.915	35.3625	1	0	38.6134	4.61171	1	0	55.9081	6.10365	1	0	28.5821	3.66641	1
hsa-miR-193a-5p	0	27.5456	3.64701	1	0	10.4695	2.42379	1	0	17.466	2.89363	1	0	29.9323	3.833	1	0	144.181	13.2752	1	0	12.5319	2.81021	1	0	17.4141	2.99996	1	0	15.973	2.78811	1
hsa-miR-193b	0	154.099	14.9653	1	0	44.2869	4.95287	1	0	140.733	14.2687	1	0	46.2292	5.21519	1	0	265.238	25.2783	1	0	129.762	12.6379	1	0	202.101	19.3518	1	0	66.7189	7.06768	1
hsa-miR-193b*	0	9.7094	2.55464	1	0	0.1	1	0	0	10.4522	2.53874	1	0	0.1	1	0	0	9.87136	2.36201	1	0	0.1	1	0	0	9.29292	2.60101	1	0	10.7075	2.52753	1
hsa-miR-194	0	6363.56	510.686	1	0	6098.88	467.25	1	0	58.0365	5.77046	1	0	4457.68	350.652	1	0	3083.74	245.608	1	0	6272.52	486.669	1	0	8624.27	680.215	1	0	3151.72	243.702	1
hsa-miR-194*	0	34.4023	3.17277	1	0	32.873	2.96407	1	0	0.1	1	0	0	21.6637	2.38231	1	0	12.5273	1.78116	1	0	45.4161	3.9505	1	0	54.6599	4.62979	1	0	21.3476	2.35424	1
hsa-miR-195	0	836.952	66.5422	1	0	195.719	15.8093	1	0	269.145	22.2084	1	0	296.888	23.8499	1	0	4132.74	331.772	1	0	1557.07	121.164	1	0	2420.78	188.97	1	0	405.729	32.4405	1
hsa-miR-195*	0	0.1	1	0	0	0.1	1	0	0	0.1	1	0	0	0.1	1	0	0	5.24538	1.19837	1	0	0.1	1	0	0	0.1	1	0	0	0.1	1	0
hsa-miR-196a	0	516.071	38.7718	1	0	283.611	20.9856	1	0	12.448	2.63077	1	0	101.838	8.39838	1	0	0.1	1	0	0	281.032	21.5959	1	0	374.744	28.7008	1	0	63.3943	5.77336	1
hsa-miR-196a*	0	0.1	1	0	0	0.1	1	0	0	0.1	1	0	0	0.1	1	0	0	0.1	1	0	0	0.1	1	0	0	0.1	1	0	0	0.1	1	0
hsa-miR-196b	0	569.151	43.1177	1	0	93.2967	7.62817	1	0	33.9778	4.16278	1	0	253.846	19.49	1	0	0.1	1	0	0	651.429	49.1299	1	0	238.323	18.6941	1	0	180.111	13.7043	1
hsa-miR-196b*	0	0.1	1	0	0	0.1	1	0	0	0.1	1	0	0	0.1	1	0	0	0.1	1	0	0	0.1	1	0	0	0.1	1	0	0	0.1	1	0
hsa-miR-197	0	62.519	5.94778	1	0	40.239	4.36262	1	0	55.5624	5.48539	1	0	88.6046	7.97107	1	0	83.0905	7.02489	1	0	60.3681	5.86232	1	0	69.8581	6.48087	1	0	30.7496	3.90787	1
hsa-miR-1972	0	28.1325	3.67382	1	0	9.60261	2.37875	1	0	31.1191	3.89123	1	0	14.7229	2.81401	1	0	13.0881	2.51348	1	0	19.0568	3.15854	1	0	24.6425	3.46164	1	0	10.885	2.5341	1
hsa-miR-1973	0	272.784	25.1958	1	0	219.885	19.9571	1	0	114.463	11.0171	1	0	112.726	10.8625	1	0	260.862	23.6974	1	0	183.849	16.9109	1	0	104.393	9.96164	1	0	291.823	26.3052	1
hsa-miR-1976	0	0.1	1	0	0	0.1	1	0	0	0.1	1	0	0	0.1	1	0	0	0.1	1	0	0	0.1	1	0	0	0.1	1	0	0	0.1	1	0
hsa-miR-198	0	14.0621	2.7535	1	0	0.1	1	0	0	11.3659	2.57586	1	0	0.1	1	0	0	7.07282	2.26027	1	0	0.1	1	0	0	15.5851	2.88483	1	0	8.1129	2.42585	1
hsa-miR-199a-3p	0	1368.01	101.351	1	0	555.076	41.3321	1	0	1433.76	107.571	1	0	892.43	66.2526	1	0	5341.09	397.096	1	0	1824.87	136.495	1	0	2220.28	166.275	1	0	353.643	26.354	1
hsa-miR-199a-5p	0	316.719	28.5428	1	0	133.879	12.2869	1	0	268.297	24.6155	1	0	181.749	16.6748	1	0	2232.17	200.738	1	0	500.837	44.668	1	0	677.124	60.1608	1	0	225.577	20.3608	1
hsa-miR-199b-5p	0	184.855	16.2855	1	0	75.8483	7.20484	1	0	225.775	20.3432	1	0	110.082	10.0454	1	0	739.125	63.9816	1	0	215.884	18.6379	1	0	336.288	28.7305	1	0	51.3241	5.46441	1
hsa-miR-19a	0	2324.26	169.784	1	0	868.279	62.9924	1	0	475.092	35.2969	1	0	1312.27	95.5124	1	0	209.136	15.8029	1	0	132.809	10.2699	1	0	217.431	16.2281	1	0	114.035	9.05987	1
hsa-miR-19a*	0	0.1	1	0	0	0.1	1	0	0	0.1	1	0	0	0.1	1	0	0	0.1	1	0	0	0.1	1	0	0	0.1	1	0	0	0.1	1	0
hsa-miR-19b	0	8421.58	683.997	1	0	2974.8	237.045	1	0	1833.39	155.738	1	0	3997.76	322.362	1	0	1718.41	146.131	1	0	1008.76	81.2139	1	0	1586.82	128.878	1	0	984.717	83.0045	1
hsa-miR-19b-1*	0	12.1589	1.69762	1	0	5.99347	1.244	1	0	0.1	1	0	0	4.4841	1.2789	1	0	4.60466	1.16613	1	0	0.1	1	0	0	0.1	1	0	0	0.1	1	0
hsa-miR-19b-2*	0	0.1	1	0	0	0.1	1	0	0	0.1	1	0	0	0.1	1	0	0	0.1	1	0	0	0.1	1	0	0	0.1	1	0	0	0.1	1	0
hsa-miR-200a	0	5189.96	407.918	1	0	1231.91	99.0953	1	0	10.1205	2.52388	1	0	2020.49	159.34	1	0	1061.41	84.6549	1	0	1258.14	98.1573	1	0	2653.59	206.083	1	0	425.423	33.6991	1
hsa-miR-200a*	0	132.691	8.66375	1	0	67.9996	4.81871	1	0	0.1	1	0	0	76.9135	5.51342	1	0	73.8439	5.14389	1	0	54.79	4.42027	1	0	92.1934	6.29157	1	0	32.3992	3.2968	1
hsa-miR-200b	0	16675.6	1365.74	1	0	5153.35	412.151	1	0	47.0274	5.25426	1	0	5297.77	435.956	1	0	2051.06	178.243	1	0	5576.4	460.064	1	0	11369.5	945.88	1	0	1925.08	161.821	1
hsa-miR-200b*	0	166.909	11.0844	1	0	64.4964	4.57324	1	0	0.1	1	0	0	71.2857	5.01878	1	0	55.0084	4.04684	1	0	75.8822	5.38123	1	0	157.458	10.3605	1	0	33.6868	2.9263	1
hsa-miR-200c	0	4875.95	462.179	1	0	3088.85	288.73	1	0	18.8812	2.9921	1	0	3486.17	328.867	1	0	1954.53	184.885	1	0	2926.83	273.823	1	0	4954.21	467.232	1	0	1267.61	117.478	1
hsa-miR-200c*	0	0.1	1	0	0	4.95492	1.19878	1	0	0.1	1	0	0	5.05985	1.29875	1	0	0.1	1	0	0	0.1	1	0	0	0.1	1	0	0	0.1	1	0
hsa-miR-202	0	19.9089	3.62636	1	0	16.1811	3.29011	1	0	22.6653	3.64809	1	0	0.1	1	0	0	23.1128	3.45495	1	0	25.1286	3.97251	1	0	48.6499	4.86795	1	0	68.5622	5.84588	1
hsa-miR-202*	0	0.1	1	0	0	0.1	1	0	0	0.1	1	0	0	0.1	1	0	0	0.1	1	0	0	0.1	1	0	0	0.1	1	0	0	0.1	1	0
hsa-miR-203	0	1383.64	107.181	1	0	1299.68	99.9975	1	0	0.1	1	0	0	408.889	31.6639	1	0	8.30618	2.3025	1	0	134.761	11.0407	1	0	478.959	37.1355	1	0	32.0574	4.07721	1
hsa-miR-204	0	0.1	1	0	0	0.1	1	0	0	0.1	1	0	0	0.1	1	0	0	78.4293	7.30125	1	0	13.5594	2.84809	1	0	35.9566	4.47182	1	0	0.1	1	0
hsa-miR-205	0	0.1	1	0	0	0.1	1	0	0	0.1	1	0	0	0.1	1	0	0	0.1	1	0	0	0.1	1	0	0	0.1	1	0	0	0.1	1	0
hsa-miR-205*	0	0.1	1	0	0	0.1	1	0	0	0.1	1	0	0	0.1	1	0	0	0.1	1	0	0	0.1	1	0	0	0.1	1	0	0	0.1	1	0
hsa-miR-2052	0	0.1	1	0	0	0.1	1	0	0	0.1	1	0	0	0.1	1	0	0	0.1	1	0	0	0.1	1	0	0	0.1	1	0	0	0.1	1	0
hsa-miR-2053	0	0.1	1	0	0	0.1	1	0	0	0.1	1	0	0	0.1	1	0	0	0.1	1	0	0	0.1	1	0	0	0.1	1	0	0	0.1	1	0
hsa-miR-206	0	0.1	1	0	0	0.1	1	0	0	0.1	1	0	0	0.1	1	0	0	0.1	1	0	0	0.1	1	0	0	0.1	1	0	0	0.1	1	0
hsa-miR-208a	0	0.1	1	0	0	0.1	1	0	0	0.1	1	0	0	0.1	1	0	0	0.1	1	0	0	0.1	1	0	0	0.1	1	0	0	0.1	1	0
hsa-miR-208b	0	0.1	1	0	0	0.1	1	0	0	0.1	1	0	0	0.1	1	0	0	0.1	1	0	0	0.1	1	0	0	0.1	1	0	0	0.1	1	0
hsa-miR-20a	0	9470.08	686.352	1	0	2439.67	177.11	1	0	1703.88	124.238	1	0	4408.34	319.037	1	0	1045.79	76.2602	1	0	1186.51	86.3147	1	0	1691.72	122.733	1	0	381.719	28.0542	1
hsa-miR-20a*	0	35.3446	4.2516	1	0	10.7037	2.43096	1	0	0.1	1	0	0	28.0104	3.69144	1	0	11.6024	2.43561	1	0	0.1	1	0	0	13.4907	2.77958	1	0	0.1	1	0
hsa-miR-20b	0	1776.43	162.351	1	0	496.852	45.3837	1	0	256.518	23.4133	1	0	868.071	79.5922	1	0	181.173	16.0783	1	0	247.937	22.6392	1	0	330.958	30.2652	1	0	65.0615	6.56669	1
hsa-miR-20b*	0	0.1	1	0	0	0.1	1	0	0	0.1	1	0	0	0.1	1	0	0	0.1	1	0	0	0.1	1	0	0	0.1	1	0	0	0.1	1	0
hsa-miR-21	0	56760.4	4330.81	1	0	33094	2484.19	1	0	58944.1	4608.39	1	0	49506.8	3767.04	1	0	11307.7	933.869	1	0	13925.4	1079.02	1	0	22371.1	1744.72	1	0	5770.55	459.627	1
hsa-miR-21*	0	155.907	12.9013	1	0	256.112	20.3325	1	0	255.741	21.0469	1	0	163.545	13.431	1	0	99.2131	8.49608	1	0	82.1934	7.34916	1	0	77.81	6.96851	1	0	81.3147	7.29164	1
hsa-miR-210	0	312.6	23.1614	1	0	707.627	51.6069	1	0	67.0168	5.94173	1	0	147.235	11.344	1	0	460.777	34.1564	1	0	283.955	21.051	1	0	687.425	50.5687	1	0	148.725	11.4047	1
hsa-miR-211	0	0.1	1	0	0	0.1	1	0	0	0.1	1	0	0	0.1	1	0	0	0.1	1	0	0	0.1	1	0	0	0.1	1	0	0	0.1	1	0
hsa-miR-2110	0	0.1	1	0	0	0.1	1	0	0	0.1	1	0	0	0.1	1	0	0	0.1	1	0	0	0.1	1	0	0	0.1	1	0	0	0.1	1	0
hsa-miR-2113	0	0.1	1	0	0	0.1	1	0	0	0.1	1	0	0	0.1	1	0	0	0.1	1	0	0	0.1	1	0	0	0.1	1	0	0	0.1	1	0
hsa-miR-2114	0	0.1	1	0	0	0.1	1	0	0	0.1	1	0	0	0.1	1	0	0	0.1	1	0	0	0.1	1	0	0	0.1	1	0	0	0.1	1	0
hsa-miR-2114*	0	0.1	1	0	0	0.1	1	0	0	0.1	1	0	0	0.1	1	0	0	0.1	1	0	0	0.1	1	0	0	0.1	1	0	0	0.1	1	0
hsa-miR-2115	0	0.1	1	0	0	0.1	1	0	0	0.1	1	0	0	0.1	1	0	0	0.1	1	0	0	0.1	1	0	0	0.1	1	0	0	0.1	1	0
hsa-miR-2115*	0	0.1	1	0	0	0.1	1	0	0	0.1	1	0	0	0.1	1	0	0	0.1	1	0	0	0.1	1	0	0	0.1	1	0	0	0.1	1	0
hsa-miR-2116	0	0.1	1	0	0	0.1	1	0	0	0.1	1	0	0	0.1	1	0	0	0.1	1	0	0	0.1	1	0	0	0.1	1	0	0	0.1	1	0
hsa-miR-2116*	0	0.1	1	0	0	0.1	1	0	0	0.1	1	0	0	0.1	1	0	0	15.0105	2.6285	1	0	0.1	1	0	0	0.1	1	0	0	10.3335	2.30306	1
hsa-miR-2117	0	0.1	1	0	0	0.1	1	0	0	0.1	1	0	0	0.1	1	0	0	0.1	1	0	0	0.1	1	0	0	0.1	1	0	0	0.1	1	0
hsa-miR-212	0	11.5188	2.62966	1	0	7.53188	2.30869	1	0	54.2041	5.39086	1	0	12.7891	2.71968	1	0	10.0007	2.36753	1	0	0.1	1	0	0	8.42847	2.57369	1	0	0.1	1	0
hsa-miR-214	0	238.233	18.5408	1	0	106.669	8.7277	1	0	250.813	19.6386	1	0	178.304	14.2424	1	0	1472.76	112.941	1	0	302.568	23.5225	1	0	372.28	28.5719	1	0	81.5014	7.15979	1
hsa-miR-214*	0	0.1	1	0	0	0.1	1	0	0	0.1	1	0	0	0.1	1	0	0	34.4908	4.09477	1	0	0.1	1	0	0	7.87451	2.55367	1	0	0.1	1	0
hsa-miR-215	0	4499.08	318.597	1	0	5588.67	396.307	1	0	56.1899	5.15923	1	0	2977.57	211.127	1	0	1188.86	84.23	1	0	5985.62	423.809	1	0	8863.99	627.559	1	0	1052.93	74.745	1
hsa-miR-216a	0	0.1	1	0	0	0.1	1	0	0	0.1	1	0	0	0.1	1	0	0	0.1	1	0	0	0.1	1	0	0	0.1	1	0	0	0.1	1	0
hsa-miR-216b	0	0.1	1	0	0	0.1	1	0	0	0.1	1	0	0	0.1	1	0	0	0.1	1	0	0	0.1	1	0	0	0.1	1	0	0	0.1	1	0
hsa-miR-217	0	0.1	1	0	0	0.1	1	0	0	0.1	1	0	0	0.1	1	0	0	0.1	1	0	0	0.1	1	0	0	0.1	1	0	0	0.1	1	0
hsa-miR-218	0	0.1	1	0	0	0.1	1	0	0	22.1444	3.65847	1	0	0.1	1	0	0	196.39	14.5404	1	0	39.2493	4.54677	1	0	65.4734	5.84629	1	0	8.78658	2.444	1
hsa-miR-218-1*	0	0.1	1	0	0	0.1	1	0	0	0.1	1	0	0	0.1	1	0	0	0.1	1	0	0	0.1	1	0	0	0.1	1	0	0	0.1	1	0
hsa-miR-218-2*	0	0.1	1	0	0	0.1	1	0	0	0.1	1	0	0	0.1	1	0	0	0.1	1	0	0	0.1	1	0	0	0.1	1	0	0	0.1	1	0
hsa-miR-219-1-3p	0	0.1	1	0	0	0.1	1	0	0	0.1	1	0	0	0.1	1	0	0	0.1	1	0	0	0.1	1	0	0	0.1	1	0	0	0.1	1	0
hsa-miR-219-2-3p	0	0.1	1	0	0	0.1	1	0	0	0.1	1	0	0	0.1	1	0	0	0.1	1	0	0	0.1	1	0	0	0.1	1	0	0	0.1	1	0
hsa-miR-219-5p	0	10.7146	2.59382	1	0	0.1	1	0	0	0.1	1	0	0	27.2184	3.93209	1	0	0.1	1	0	0	0.1	1	0	0	0.1	1	0	0	0.1	1	0
hsa-miR-22	0	1903.1	151.971	1	0	1319.09	103.809	1	0	4615.41	378.042	1	0	1895.39	149.562	1	0	5974.42	489.814	1	0	2057.03	160.973	1	0	2886.32	227.861	1	0	1980.18	160.476	1
hsa-miR-22*	0	10.297	2.58099	1	0	9.83985	2.39441	1	0	27.268	3.58661	1	0	14.3021	2.79261	1	0	17.6183	2.78114	1	0	15.2435	2.93856	1	0	21.0899	3.2192	1	0	0.1	1	0
hsa-miR-221	0	507.634	42.6928	1	0	239.002	20.1914	1	0	1683.66	140.968	1	0	124.361	10.9733	1	0	78.5646	7.16026	1	0	95.5256	8.70646	1	0	125.246	11.1621	1	0	38.89	4.46382	1
hsa-miR-221*	0	37.0147	4.41401	1	0	12.4234	2.51717	1	0	141.491	11.7321	1	0	15.9032	2.88357	1	0	18.6973	2.84561	1	0	11.7633	2.77368	1	0	16.8212	2.96592	1	0	0.1	1	0
hsa-miR-222	0	92.6119	9.56364	1	0	64.1825	6.79098	1	0	452.767	42.6205	1	0	101.903	10.4807	1	0	118.839	11.6457	1	0	74.6783	7.8866	1	0	72.5696	7.6543	1	0	83.2294	8.63386	1
hsa-miR-222*	0	0.1	1	0	0	0.1	1	0	0	0.1	1	0	0	0.1	1	0	0	0.1	1	0	0	0.1	1	0	0	0.1	1	0	0	0.1	1	0
hsa-miR-223	0	2151.38	171.576	1	0	1810.79	143.742	1	0	4942.44	390.436	1	0	3583.3	280.877	1	0	2192.97	174.605	1	0	926.631	73.7287	1	0	1138.04	91.8259	1	0	231.589	18.3646	1
hsa-miR-223*	0	0.1	1	0	0	0.1	1	0	0	12.6717	1.89231	1	0	0.1	1	0	0	0.1	1	0	0	0.1	1	0	0	0.1	1	0	0	0.1	1	0
hsa-miR-224	0	636.859	48.5652	1	0	99.0135	8.15735	1	0	108.498	9.02189	1	0	151.653	11.9892	1	0	101.738	8.18871	1	0	62.0177	5.91369	1	0	63.5497	5.97909	1	0	8.36211	2.43452	1
hsa-miR-224*	0	21.3519	3.18671	1	0	0.1	1	0	0	0.1	1	0	0	0.1	1	0	0	15.1768	2.63248	1	0	0.1	1	0	0	9.66869	2.61931	1	0	0.1	1	0
hsa-miR-2276	0	63.4597	5.60868	1	0	34.298	3.92867	1	0	32.9696	4.01735	1	0	44.9256	4.64825	1	0	18.1671	3.29933	1	0	25.9995	3.99838	1	0	40.7864	4.50348	1	0	26.8369	3.74983	1
hsa-miR-2277-3p	0	0.1	1	0	0	0.1	1	0	0	0.1	1	0	0	0.1	1	0	0	0.1	1	0	0	0.1	1	0	0	0.1	1	0	0	0.1	1	0
hsa-miR-2277-5p	0	0.1	1	0	0	0.1	1	0	0	0.1	1	0	0	0.1	1	0	0	0.1	1	0	0	0.1	1	0	0	0.1	1	0	0	0.1	1	0
hsa-miR-2278	0	0.1	1	0	0	0.1	1	0	0	0.1	1	0	0	0.1	1	0	0	0.1	1	0	0	0.1	1	0	0	0.1	1	0	0	0.1	1	0
hsa-miR-2355-3p	0	0.1	1	0	0	0.1	1	0	0	0.1	1	0	0	0.1	1	0	0	0.1	1	0	0	0.1	1	0	0	0.1	1	0	0	0.1	1	0
hsa-miR-2355-5p	0	0.1	1	0	0	0.1	1	0	0	0.1	1	0	0	0.1	1	0	0	0.1	1	0	0	0.1	1	0	0	0.1	1	0	0	0.1	1	0
hsa-miR-23a	0	9134.2	729.102	1	0	1858.03	148.859	1	0	3786.3	306.982	1	0	2744.49	220.79	1	0	4084.44	324.447	1	0	2756.95	219.411	1	0	3603.67	286.153	1	0	729.843	57.2809	1
hsa-miR-23a*	0	24.4267	2.52434	1	0	4.82758	1.19311	1	0	25.9878	2.59744	1	0	3.82786	1.26072	1	0	3.58934	1.13156	1	0	5.74336	1.37946	1	0	15.0568	2.02772	1	0	10.6118	1.78199	1
hsa-miR-23b	0	1917.64	155.647	1	0	509.712	41.2192	1	0	486.568	39.6945	1	0	990.704	80.0918	1	0	4636	364.887	1	0	1978.81	155.947	1	0	2827.88	224.47	1	0	580.882	44.0995	1
hsa-miR-23b*	0	4.88787	1.28556	1	0	0.1	1	0	0	3.83017	1.21938	1	0	0.1	1	0	0	15.6778	1.9613	1	0	4.8208	1.34391	1	0	7.03779	1.40271	1	0	0.1	1	0
hsa-miR-23c	0	0.1	1	0	0	0.1	1	0	0	16.6342	3.47598	1	0	0.1	1	0	0	16.4131	3.25896	1	0	0.1	1	0	0	0.1	1	0	0	15.7314	3.41945	1
hsa-miR-24	0	5924.18	423.656	1	0	1456.78	103.885	1	0	3884.47	276.93	1	0	2229.49	159.076	1	0	4518.4	323.116	1	0	2075.85	148.469	1	0	2467	177.549	1	0	1129.3	80.065	1
hsa-miR-24-1*	0	10.9056	2.60414	1	0	0.1	1	0	0	0.1	1	0	0	0.1	1	0	0	44.3262	4.57257	1	0	8.71568	2.65497	1	0	10.8718	2.66468	1	0	0.1	1	0
hsa-miR-24-2*	0	0.1	1	0	0	0.1	1	0	0	0.1	1	0	0	0.1	1	0	0	0.1	1	0	0	0.1	1	0	0	0.1	1	0	0	0.1	1	0
hsa-miR-25	0	1032.8	85.2818	1	0	632.083	50.9499	1	0	529.734	45.3318	1	0	1469.74	120.069	1	0	622.739	52.7765	1	0	466.645	37.8545	1	0	607.302	49.5771	1	0	162.503	13.8399	1
hsa-miR-25*	0	0.1	1	0	0	0.1	1	0	0	0.1	1	0	0	5.29741	1.31498	1	0	0.1	1	0	0	0.1	1	0	0	0.1	1	0	0	0.1	1	0
hsa-miR-26a	0	2225.5	182.276	1	0	811.7	65.6198	1	0	735.922	59.7395	1	0	1170.15	95.3573	1	0	5659.35	447.756	1	0	2968.82	237.565	1	0	3647.77	295.339	1	0	1440.54	112.227	1
hsa-miR-26a-1*	0	0.1	1	0	0	0.1	1	0	0	0.1	1	0	0	0.1	1	0	0	0.1	1	0	0	0.1	1	0	0	0.1	1	0	0	0.1	1	0
hsa-miR-26a-2*	0	0.1	1	0	0	0.1	1	0	0	0.1	1	0	0	0.1	1	0	0	0.1	1	0	0	0.1	1	0	0	0.1	1	0	0	0.1	1	0
hsa-miR-26b	0	1659.45	121.198	1	0	720.971	53.2154	1	0	806.402	59.0051	1	0	1160.72	84.9939	1	0	2550.67	185.373	1	0	1611.97	117.731	1	0	2937.54	214.936	1	0	283.346	20.7997	1
hsa-miR-26b*	0	0.1	1	0	0	0.1	1	0	0	0.1	1	0	0	0.1	1	0	0	0.1	1	0	0	0.1	1	0	0	0.1	1	0	0	0.1	1	0
hsa-miR-27a	0	7106.66	554.101	1	0	1741.32	132.801	1	0	3628.45	288.21	1	0	1790.92	141.859	1	0	3513.89	271.891	1	0	1953.75	150.131	1	0	2399.49	186.422	1	0	693.221	51.9453	1
hsa-miR-27a*	0	0.1	1	0	0	0.1	1	0	0	0.1	1	0	0	0.1	1	0	0	0.1	1	0	0	0.1	1	0	0	0.1	1	0	0	0.1	1	0
hsa-miR-27b	0	2181.35	167.7	1	0	725.927	55.0346	1	0	694.057	54.2697	1	0	1084.17	84.1879	1	0	4085.9	313.473	1	0	1866.4	141.806	1	0	2525.18	192.369	1	0	542.526	41.3248	1
hsa-miR-27b*	0	0.1	1	0	0	0.1	1	0	0	0.1	1	0	0	0.1	1	0	0	0.1	1	0	0	0.1	1	0	0	0.1	1	0	0	0.1	1	0
hsa-miR-28-3p	0	0.1	1	0	0	0.1	1	0	0	0.1	1	0	0	0.1	1	0	0	4.93918	1.18432	1	0	4.97955	1.35213	1	0	4.55853	1.29627	1	0	4.32459	1.22008	1
hsa-miR-28-5p	0	213.962	16.4797	1	0	107.694	8.61572	1	0	116.381	9.33658	1	0	234.342	17.8097	1	0	303.51	23.4559	1	0	254.698	19.9179	1	0	407.865	31.6531	1	0	63.7796	5.89508	1
hsa-miR-2861	0	2591.43	210.447	1	0	1693.81	136.501	1	0	1685.73	140.027	1	0	3476.24	278.736	1	0	1707.37	143.375	1	0	2155.21	178.466	1	0	2094.19	173.789	1	0	2384.7	196.317	1
hsa-miR-2909	0	0.1	1	0	0	0.1	1	0	0	0.1	1	0	0	0.1	1	0	0	0.1	1	0	0	0.1	1	0	0	0.1	1	0	0	0.1	1	0
hsa-miR-296-3p	0	0.1	1	0	0	0.1	1	0	0	0.1	1	0	0	0.1	1	0	0	0.1	1	0	0	0.1	1	0	0	0.1	1	0	0	0.1	1	0
hsa-miR-296-5p	0	39.3108	4.49667	1	0	27.4635	3.74296	1	0	16.9093	2.87172	1	0	42.2292	4.76883	1	0	25.0932	3.61488	1	0	13.816	2.87092	1	0	18.5416	3.05702	1	0	30.366	3.97357	1
hsa-miR-297	0	0.1	1	0	0	0.1	1	0	0	0.1	1	0	0	0.1	1	0	0	0.1	1	0	0	0.1	1	0	0	0.1	1	0	0	0.1	1	0
hsa-miR-298	0	0.1	1	0	0	0.1	1	0	0	0.1	1	0	0	0.1	1	0	0	0.1	1	0	0	0.1	1	0	0	0.1	1	0	0	0.1	1	0
hsa-miR-299-3p	0	0.1	1	0	0	0.1	1	0	0	0.1	1	0	0	0.1	1	0	0	36.3892	4.03851	1	0	0.1	1	0	0	0.1	1	0	0	0.1	1	0
hsa-miR-299-5p	0	8.55681	2.5121	1	0	0.1	1	0	0	9.21666	2.48485	1	0	0.1	1	0	0	106.22	8.81654	1	0	13.0314	2.83675	1	0	16.5754	2.94576	1	0	0.1	1	0
hsa-miR-29a	0	14440.9	1097.72	1	0	4824.32	361.599	1	0	14172	1079.99	1	0	6094.52	468.224	1	0	8730.02	701.788	1	0	4138.8	326.567	1	0	7586.74	598.052	1	0	2073.79	163.634	1
hsa-miR-29a*	0	6.61361	1.35423	1	0	0.1	1	0	0	4.8475	1.25542	1	0	0.1	1	0	0	0.1	1	0	0	0.1	1	0	0	0.1	1	0	0	0.1	1	0
hsa-miR-29b	0	7219.14	645.922	1	0	2465.85	218.578	1	0	6962.31	635.148	1	0	2876.14	256.737	1	0	2737.69	251.552	1	0	997.866	89.3269	1	0	2023.17	181.787	1	0	520.464	47.8007	1
hsa-miR-29b-1*	0	35.6653	3.0633	1	0	35.4582	2.88719	1	0	68.0742	4.76893	1	0	28.8767	2.73564	1	0	22.5296	2.31864	1	0	5.88604	1.38421	1	0	11.8268	1.92943	1	0	0.1	1	0
hsa-miR-29b-2*	0	0.1	1	0	0	0.1	1	0	0	0.1	1	0	0	0.1	1	0	0	0.1	1	0	0	0.1	1	0	0	0.1	1	0	0	0.1	1	0
hsa-miR-29c	0	1908.07	135.601	1	0	999.243	70.9639	1	0	1329.23	94.5893	1	0	1369.11	97.1748	1	0	8457.72	599.816	1	0	2109.71	149.734	1	0	4128.56	292.935	1	0	1186.66	84.1038	1
hsa-miR-29c*	0	18.7871	3.01634	1	0	11.7982	2.48056	1	0	22.3832	3.22541	1	0	20.0804	3.12498	1	0	211.58	17.9514	1	0	51.0361	5.45847	1	0	82.6814	7.74024	1	0	22.593	3.2125	1
hsa-miR-300	0	0.1	1	0	0	0.1	1	0	0	0.1	1	0	0	0.1	1	0	0	0.1	1	0	0	0.1	1	0	0	0.1	1	0	0	0.1	1	0
hsa-miR-301a	0	96.4594	8.32615	1	0	18.1705	2.84451	1	0	30.1621	3.80252	1	0	36.7664	4.49575	1	0	22.7081	3.13404	1	0	0.1	1	0	0	8.55798	2.57931	1	0	0.1	1	0
hsa-miR-301b	0	14.4744	2.00185	1	0	0.1	1	0	0	6.00187	1.3037	1	0	4.87461	1.29754	1	0	0.1	1	0	0	0.1	1	0	0	0.1	1	0	0	0.1	1	0
hsa-miR-302a	0	0.1	1	0	0	0.1	1	0	0	0.1	1	0	0	0.1	1	0	0	0.1	1	0	0	0.1	1	0	0	0.1	1	0	0	0.1	1	0
hsa-miR-302a*	0	0.1	1	0	0	0.1	1	0	0	0.1	1	0	0	0.1	1	0	0	0.1	1	0	0	0.1	1	0	0	0.1	1	0	0	0.1	1	0
hsa-miR-302b	0	0.1	1	0	0	0.1	1	0	0	0.1	1	0	0	0.1	1	0	0	0.1	1	0	0	0.1	1	0	0	0.1	1	0	0	0.1	1	0
hsa-miR-302b*	0	0.1	1	0	0	0.1	1	0	0	0.1	1	0	0	0.1	1	0	0	0.1	1	0	0	0.1	1	0	0	0.1	1	0	0	0.1	1	0
hsa-miR-302c	0	0.1	1	0	0	0.1	1	0	0	0.1	1	0	0	0.1	1	0	0	0.1	1	0	0	0.1	1	0	0	0.1	1	0	0	0.1	1	0
hsa-miR-302c*	0	0.1	1	0	0	0.1	1	0	0	0.1	1	0	0	0.1	1	0	0	0.1	1	0	0	0.1	1	0	0	0.1	1	0	0	0.1	1	0
hsa-miR-302d	0	0.1	1	0	0	0.1	1	0	0	0.1	1	0	0	0.1	1	0	0	0.1	1	0	0	0.1	1	0	0	0.1	1	0	0	0.1	1	0
hsa-miR-302d*	0	0.1	1	0	0	0.1	1	0	0	0.1	1	0	0	0.1	1	0	0	0.1	1	0	0	0.1	1	0	0	0.1	1	0	0	0.1	1	0
hsa-miR-302e	0	0.1	1	0	0	0.1	1	0	0	0.1	1	0	0	0.1	1	0	0	0.1	1	0	0	0.1	1	0	0	0.1	1	0	0	0.1	1	0
hsa-miR-302f	0	0.1	1	0	0	0.1	1	0	0	0.1	1	0	0	0.1	1	0	0	0.1	1	0	0	0.1	1	0	0	0.1	1	0	0	0.1	1	0
hsa-miR-3065-3p	0	0.1	1	0	0	0.1	1	0	0	0.1	1	0	0	0.1	1	0	0	0.1	1	0	0	0.1	1	0	0	0.1	1	0	0	0.1	1	0
hsa-miR-3065-5p	0	0.1	1	0	0	0.1	1	0	0	0.1	1	0	0	0.1	1	0	0	7.29464	2.26105	1	0	0.1	1	0	0	0.1	1	0	0	0.1	1	0
hsa-miR-3074	0	0.1	1	0	0	0.1	1	0	0	0.1	1	0	0	0.1	1	0	0	0.1	1	0	0	0.1	1	0	0	0.1	1	0	0	0.1	1	0
hsa-miR-30a	0	173.242	14.8009	1	0	44.0673	4.70517	1	0	103.495	9.17032	1	0	53.4147	5.53203	1	0	2375.73	183.398	1	0	242.431	19.1199	1	0	324.458	26.0701	1	0	238.227	17.5846	1
hsa-miR-30a*	0	0.1	1	0	0	0.1	1	0	0	0.1	1	0	0	0.1	1	0	0	184.753	13.9025	1	0	23.9584	3.96087	1	0	29.3386	4.05165	1	0	7.48619	2.40059	1
hsa-miR-30b	0	2075.43	157.682	1	0	542.193	40.4685	1	0	610.262	47.6612	1	0	691.82	52.3561	1	0	1706.22	131.917	1	0	981.986	73.8962	1	0	1971.72	149.69	1	0	272.139	20.6513	1
hsa-miR-30b*	0	14.5798	2.79133	1	0	0.1	1	0	0	14.0168	2.70683	1	0	0.1	1	0	0	9.6696	2.3491	1	0	8.70441	2.66084	1	0	12.6192	2.74556	1	0	0.1	1	0
hsa-miR-30c	0	492.639	43.5994	1	0	176.746	15.8661	1	0	127.757	11.9544	1	0	252.05	22.5547	1	0	791.398	68.9973	1	0	383.927	33.4296	1	0	630.548	55.3938	1	0	117.015	10.3667	1
hsa-miR-30c-1*	0	6.88092	1.36809	1	0	3.91123	1.15708	1	0	4.71088	1.24979	1	0	4.08323	1.26688	1	0	4.147	1.14876	1	0	4.93831	1.35115	1	0	6.31134	1.36866	1	0	4.53746	1.22948	1
hsa-miR-30c-2*	0	13.0812	2.70463	1	0	0.1	1	0	0	12.0367	2.608	1	0	8.27165	2.53599	1	0	16.9116	2.73475	1	0	0.1	1	0	0	10.5072	2.65463	1	0	0.1	1	0
hsa-miR-30d	0	908.467	65.2941	1	0	230.079	16.7063	1	0	242.668	17.6914	1	0	272.764	19.7849	1	0	880.401	62.7579	1	0	514.492	36.8155	1	0	693.458	49.7682	1	0	377.643	26.9256	1
hsa-miR-30d*	0	0.1	1	0	0	0.1	1	0	0	0.1	1	0	0	0.1	1	0	0	0.1	1	0	0	0.1	1	0	0	0.1	1	0	0	0.1	1	0
hsa-miR-30e	0	620.463	51.517	1	0	269.045	22.4856	1	0	203.788	17.751	1	0	319.325	26.9878	1	0	487.214	40.2985	1	0	320.828	26.5156	1	0	520.789	43.3358	1	0	218.543	17.586	1
hsa-miR-30e*	0	38.4274	4.56252	1	0	30.343	3.88667	1	0	19.228	3.01168	1	0	33.608	4.32738	1	0	85.1317	7.44555	1	0	55.0756	5.58423	1	0	83.1674	7.39819	1	0	10.0664	2.49672	1
hsa-miR-31	0	0.1	1	0	0	133.993	10.8346	1	0	1794.47	139.801	1	0	0.1	1	0	0	15.1917	2.62876	1	0	0.1	1	0	0	0.1	1	0	0	0.1	1	0
hsa-miR-31*	0	0.1	1	0	0	89.2709	7.8235	1	0	1103.81	92.6087	1	0	0.1	1	0	0	0.1	1	0	0	0.1	1	0	0	0.1	1	0	0	0.1	1	0
hsa-miR-3115	0	0.1	1	0	0	0.1	1	0	0	0.1	1	0	0	0.1	1	0	0	0.1	1	0	0	0.1	1	0	0	0.1	1	0	0	0.1	1	0
hsa-miR-3116	0	0.1	1	0	0	0.1	1	0	0	0.1	1	0	0	0.1	1	0	0	0.1	1	0	0	0.1	1	0	0	0.1	1	0	0	0.1	1	0
hsa-miR-3117	0	0.1	1	0	0	0.1	1	0	0	0.1	1	0	0	0.1	1	0	0	0.1	1	0	0	0.1	1	0	0	0.1	1	0	0	0.1	1	0
hsa-miR-3118	0	0.1	1	0	0	0.1	1	0	0	0.1	1	0	0	0.1	1	0	0	0.1	1	0	0	0.1	1	0	0	0.1	1	0	0	0.1	1	0
hsa-miR-3119	0	0.1	1	0	0	0.1	1	0	0	0.1	1	0	0	0.1	1	0	0	0.1	1	0	0	0.1	1	0	0	0.1	1	0	0	0.1	1	0
hsa-miR-3120	0	0.1	1	0	0	0.1	1	0	0	0.1	1	0	0	0.1	1	0	0	0.1	1	0	0	0.1	1	0	0	0.1	1	0	0	0.1	1	0
hsa-miR-3121	0	0.1	1	0	0	0.1	1	0	0	0.1	1	0	0	0.1	1	0	0	0.1	1	0	0	0.1	1	0	0	0.1	1	0	0	0.1	1	0
hsa-miR-3122	0	0.1	1	0	0	0.1	1	0	0	0.1	1	0	0	0.1	1	0	0	0.1	1	0	0	0.1	1	0	0	0.1	1	0	0	0.1	1	0
hsa-miR-3123	0	0.1	1	0	0	0.1	1	0	0	0.1	1	0	0	0.1	1	0	0	0.1	1	0	0	0.1	1	0	0	0.1	1	0	0	0.1	1	0
hsa-miR-3124	0	0.1	1	0	0	0.1	1	0	0	0.1	1	0	0	0.1	1	0	0	0.1	1	0	0	0.1	1	0	0	0.1	1	0	0	0.1	1	0
hsa-miR-3125	0	74.6753	6.32755	1	0	48.1232	4.65023	1	0	108.699	9.13966	1	0	50.3034	4.95418	1	0	34.4684	3.91672	1	0	47.5148	4.93531	1	0	68.1946	5.98477	1	0	37.1712	4.1983	1
hsa-miR-3126-3p	0	0.1	1	0	0	0.1	1	0	0	0.1	1	0	0	0.1	1	0	0	0.1	1	0	0	0.1	1	0	0	0.1	1	0	0	0.1	1	0
hsa-miR-3126-5p	0	0.1	1	0	0	0.1	1	0	0	0.1	1	0	0	0.1	1	0	0	0.1	1	0	0	0.1	1	0	0	0.1	1	0	0	0.1	1	0
hsa-miR-3127	0	58.2343	5.31227	1	0	38.5008	4.14169	1	0	42.9465	4.49363	1	0	29.949	4.00358	1	0	34.7332	3.93499	1	0	43.0384	4.69038	1	0	53.9947	5.16054	1	0	39.6607	4.28987	1
hsa-miR-3128	0	0.1	1	0	0	0.1	1	0	0	0.1	1	0	0	0.1	1	0	0	0.1	1	0	0	0.1	1	0	0	0.1	1	0	0	0.1	1	0
hsa-miR-3129	0	0.1	1	0	0	0.1	1	0	0	0.1	1	0	0	0.1	1	0	0	0.1	1	0	0	0.1	1	0	0	0.1	1	0	0	0.1	1	0
hsa-miR-3130-3p	0	0.1	1	0	0	0.1	1	0	0	0.1	1	0	0	0.1	1	0	0	0.1	1	0	0	0.1	1	0	0	0.1	1	0	0	0.1	1	0
hsa-miR-3130-5p	0	0.1	1	0	0	0.1	1	0	0	0.1	1	0	0	0.1	1	0	0	0.1	1	0	0	0.1	1	0	0	0.1	1	0	0	8.78022	2.44744	1
hsa-miR-3131	0	33.8965	4.25391	1	0	0.1	1	0	0	27.1646	3.8487	1	0	11.1738	2.6462	1	0	0.1	1	0	0	14.9014	2.92292	1	0	15.5364	2.8862	1	0	9.79051	2.4835	1
hsa-miR-3132	0	30.9008	4.02511	1	0	21.5266	3.457	1	0	30.1349	3.93723	1	0	10.3042	2.6098	1	0	0.1	1	0	0	0.1	1	0	0	28.3089	3.99398	1	0	7.46533	2.40554	1
hsa-miR-3133	0	0.1	1	0	0	0.1	1	0	0	0.1	1	0	0	0.1	1	0	0	0.1	1	0	0	0.1	1	0	0	0.1	1	0	0	0.1	1	0
hsa-miR-3134	0	0.1	1	0	0	0.1	1	0	0	0.1	1	0	0	0.1	1	0	0	0.1	1	0	0	0.1	1	0	0	0.1	1	0	0	0.1	1	0
hsa-miR-3135	0	0.1	1	0	0	0.1	1	0	0	0.1	1	0	0	0.1	1	0	0	0.1	1	0	0	0.1	1	0	0	0.1	1	0	0	0.1	1	0
hsa-miR-3136	0	0.1	1	0	0	0.1	1	0	0	0.1	1	0	0	0.1	1	0	0	7.20907	2.26207	1	0	0.1	1	0	0	0.1	1	0	0	21.3587	3.56636	1
hsa-miR-3137	0	62.9405	5.62097	1	0	23.5127	3.51161	1	0	39.2083	4.3093	1	0	36.6243	4.28276	1	0	23.8595	3.4736	1	0	41.3646	4.65473	1	0	55.8584	5.26696	1	0	32.6519	3.98756	1
hsa-miR-3138	0	120.644	9.17715	1	0	30.2245	3.74973	1	0	72.049	6.06557	1	0	46.1172	4.71486	1	0	23.6113	3.46512	1	0	43.9037	4.72801	1	0	69.0242	5.98064	1	0	46.5439	4.61204	1
hsa-miR-3139	0	0.1	1	0	0	0.1	1	0	0	0.1	1	0	0	0.1	1	0	0	0.1	1	0	0	0.1	1	0	0	0.1	1	0	0	0.1	1	0
hsa-miR-3140	0	0.1	1	0	0	0.1	1	0	0	0.1	1	0	0	0.1	1	0	0	0.1	1	0	0	0.1	1	0	0	0.1	1	0	0	0.1	1	0
hsa-miR-3141	0	484.326	34.4837	1	0	169.618	12.4048	1	0	303.207	21.7739	1	0	245.021	17.6721	1	0	111.067	8.43234	1	0	201.895	14.7411	1	0	310.573	22.2747	1	0	193.522	14.0789	1
hsa-miR-3142	0	0.1	1	0	0	0.1	1	0	0	0.1	1	0	0	0.1	1	0	0	0.1	1	0	0	0.1	1	0	0	0.1	1	0	0	0.1	1	0
hsa-miR-3143	0	0.1	1	0	0	0.1	1	0	0	0.1	1	0	0	0.1	1	0	0	0.1	1	0	0	0.1	1	0	0	0.1	1	0	0	0.1	1	0
hsa-miR-3144-3p	0	0.1	1	0	0	0.1	1	0	0	0.1	1	0	0	0.1	1	0	0	0.1	1	0	0	0.1	1	0	0	0.1	1	0	0	0.1	1	0
hsa-miR-3144-5p	0	0.1	1	0	0	0.1	1	0	0	0.1	1	0	0	0.1	1	0	0	0.1	1	0	0	0.1	1	0	0	0.1	1	0	0	0.1	1	0
hsa-miR-3145	0	0.1	1	0	0	0.1	1	0	0	0.1	1	0	0	0.1	1	0	0	0.1	1	0	0	0.1	1	0	0	0.1	1	0	0	0.1	1	0
hsa-miR-3146	0	0.1	1	0	0	0.1	1	0	0	0.1	1	0	0	0.1	1	0	0	0.1	1	0	0	0.1	1	0	0	0.1	1	0	0	0.1	1	0
hsa-miR-3147	0	26.8972	3.87144	1	0	0.1	1	0	0	29.9288	3.94452	1	0	7.90672	2.52246	1	0	6.81586	2.24626	1	0	10.4449	2.71836	1	0	30.3071	4.14104	1	0	9.08547	2.46031	1
hsa-miR-3148	0	0.1	1	0	0	0.1	1	0	0	0.1	1	0	0	0.1	1	0	0	0.1	1	0	0	0.1	1	0	0	0.1	1	0	0	0.1	1	0
hsa-miR-3149	0	0.1	1	0	0	0.1	1	0	0	0.1	1	0	0	0.1	1	0	0	0.1	1	0	0	0.1	1	0	0	0.1	1	0	0	0.1	1	0
hsa-miR-3150	0	0.1	1	0	0	0.1	1	0	0	0.1	1	0	0	0.1	1	0	0	0.1	1	0	0	0.1	1	0	0	0.1	1	0	0	0.1	1	0
hsa-miR-3150b	0	0.1	1	0	0	0.1	1	0	0	0.1	1	0	0	0.1	1	0	0	0.1	1	0	0	0.1	1	0	0	0.1	1	0	0	0.1	1	0
hsa-miR-3151	0	0.1	1	0	0	0.1	1	0	0	0.1	1	0	0	0.1	1	0	0	0.1	1	0	0	0.1	1	0	0	0.1	1	0	0	0.1	1	0
hsa-miR-3152	0	0.1	1	0	0	0.1	1	0	0	0.1	1	0	0	0.1	1	0	0	0.1	1	0	0	0.1	1	0	0	0.1	1	0	0	0.1	1	0
hsa-miR-3153	0	0.1	1	0	0	0.1	1	0	0	0.1	1	0	0	0.1	1	0	0	0.1	1	0	0	0.1	1	0	0	0.1	1	0	0	0.1	1	0
hsa-miR-3154	0	37.6321	4.31914	1	0	8.9101	2.35157	1	0	33.8106	4.09414	1	0	12.8425	2.72089	1	0	7.59461	2.2755	1	0	11.6977	2.76835	1	0	32.3526	4.18981	1	0	8.35958	2.43716	1
hsa-miR-3155	0	0.1	1	0	0	0.1	1	0	0	0.1	1	0	0	0.1	1	0	0	0.1	1	0	0	0.1	1	0	0	0.1	1	0	0	0.1	1	0
hsa-miR-3156	0	115.984	8.87852	1	0	82.4547	6.60433	1	0	69.2955	5.91191	1	0	129.957	9.80545	1	0	34.2323	3.89776	1	0	107.594	8.41057	1	0	81.0838	6.72291	1	0	49.4952	4.77335	1
hsa-miR-3157	0	0.1	1	0	0	0.1	1	0	0	0.1	1	0	0	0.1	1	0	0	0.1	1	0	0	0.1	1	0	0	0.1	1	0	0	0.1	1	0
hsa-miR-3158	0	0.1	1	0	0	0.1	1	0	0	0.1	1	0	0	0.1	1	0	0	0.1	1	0	0	0.1	1	0	0	0.1	1	0	0	0.1	1	0
hsa-miR-3159	0	0.1	1	0	0	0.1	1	0	0	0.1	1	0	0	0.1	1	0	0	0.1	1	0	0	0.1	1	0	0	0.1	1	0	0	0.1	1	0
hsa-miR-3160	0	0.1	1	0	0	0.1	1	0	0	0.1	1	0	0	0.1	1	0	0	0.1	1	0	0	0.1	1	0	0	0.1	1	0	0	0.1	1	0
hsa-miR-3161	0	0.1	1	0	0	0.1	1	0	0	0.1	1	0	0	7.58599	2.51244	1	0	0.1	1	0	0	0.1	1	0	0	0.1	1	0	0	0.1	1	0
hsa-miR-3162	0	1545.84	109.611	1	0	829.851	58.862	1	0	992.403	70.4082	1	0	1195.34	84.8196	1	0	1412.46	99.9728	1	0	909.151	64.4564	1	0	1604.27	113.622	1	0	1285.61	91.1471	1
hsa-miR-3163	0	0.1	1	0	0	0.1	1	0	0	0.1	1	0	0	0.1	1	0	0	0.1	1	0	0	0.1	1	0	0	0.1	1	0	0	0.1	1	0
hsa-miR-3164	0	0.1	1	0	0	0.1	1	0	0	0.1	1	0	0	0.1	1	0	0	0.1	1	0	0	0.1	1	0	0	0.1	1	0	0	0.1	1	0
hsa-miR-3165	0	0.1	1	0	0	0.1	1	0	0	0.1	1	0	0	0.1	1	0	0	0.1	1	0	0	0.1	1	0	0	0.1	1	0	0	0.1	1	0
hsa-miR-3166	0	0.1	1	0	0	0.1	1	0	0	0.1	1	0	0	0.1	1	0	0	0.1	1	0	0	0.1	1	0	0	0.1	1	0	0	0.1	1	0
hsa-miR-3167	0	0.1	1	0	0	0.1	1	0	0	0.1	1	0	0	0.1	1	0	0	0.1	1	0	0	0.1	1	0	0	0.1	1	0	0	0.1	1	0
hsa-miR-3168	0	0.1	1	0	0	0.1	1	0	0	0.1	1	0	0	0.1	1	0	0	0.1	1	0	0	0.1	1	0	0	0.1	1	0	0	0.1	1	0
hsa-miR-3169	0	0.1	1	0	0	0.1	1	0	0	0.1	1	0	0	0.1	1	0	0	0.1	1	0	0	0.1	1	0	0	0.1	1	0	0	0.1	1	0
hsa-miR-3170	0	0.1	1	0	0	0.1	1	0	0	0.1	1	0	0	0.1	1	0	0	0.1	1	0	0	0.1	1	0	0	0.1	1	0	0	0.1	1	0
hsa-miR-3171	0	0.1	1	0	0	0.1	1	0	0	0.1	1	0	0	0.1	1	0	0	0.1	1	0	0	0.1	1	0	0	0.1	1	0	0	0.1	1	0
hsa-miR-3173	0	0.1	1	0	0	0.1	1	0	0	0.1	1	0	0	0.1	1	0	0	0.1	1	0	0	0.1	1	0	0	0.1	1	0	0	0.1	1	0
hsa-miR-3174	0	8.414	2.50317	1	0	0.1	1	0	0	22.2098	3.62434	1	0	0.1	1	0	0	0.1	1	0	0	0.1	1	0	0	0.1	1	0	0	0.1	1	0
hsa-miR-3175	0	0.1	1	0	0	0.1	1	0	0	0.1	1	0	0	0.1	1	0	0	0.1	1	0	0	0.1	1	0	0	0.1	1	0	0	0.1	1	0
hsa-miR-3176	0	0.1	1	0	0	0.1	1	0	0	0.1	1	0	0	0.1	1	0	0	0.1	1	0	0	8.49064	2.64725	1	0	0.1	1	0	0	0.1	1	0
hsa-miR-3177	0	0.1	1	0	0	0.1	1	0	0	0.1	1	0	0	0.1	1	0	0	0.1	1	0	0	0.1	1	0	0	0.1	1	0	0	0.1	1	0
hsa-miR-3178	0	0.1	1	0	0	0.1	1	0	0	0.1	1	0	0	0.1	1	0	0	0.1	1	0	0	0.1	1	0	0	0.1	1	0	0	0.1	1	0
hsa-miR-3179	0	0.1	1	0	0	0.1	1	0	0	0.1	1	0	0	0.1	1	0	0	0.1	1	0	0	0.1	1	0	0	0.1	1	0	0	0.1	1	0
hsa-miR-3180	0	0.1	1	0	0	0.1	1	0	0	0.1	1	0	0	0.1	1	0	0	0.1	1	0	0	0.1	1	0	0	0.1	1	0	0	0.1	1	0
hsa-miR-3180-3p	0	31.0463	4.00175	1	0	0.1	1	0	0	0.1	1	0	0	42.8651	4.55465	1	0	0.1	1	0	0	0.1	1	0	0	0.1	1	0	0	0.1	1	0
hsa-miR-3180-5p	0	0.1	1	0	0	7.36279	2.30803	1	0	9.65063	2.51108	1	0	0.1	1	0	0	21.4672	3.42735	1	0	0.1	1	0	0	0.1	1	0	0	21.7291	3.58448	1
hsa-miR-3181	0	0.1	1	0	0	0.1	1	0	0	0.1	1	0	0	0.1	1	0	0	0.1	1	0	0	0.1	1	0	0	0.1	1	0	0	0.1	1	0
hsa-miR-3182	0	0.1	1	0	0	0.1	1	0	0	0.1	1	0	0	0.1	1	0	0	0.1	1	0	0	0.1	1	0	0	0.1	1	0	0	0.1	1	0
hsa-miR-3183	0	0.1	1	0	0	0.1	1	0	0	0.1	1	0	0	0.1	1	0	0	0.1	1	0	0	0.1	1	0	0	0.1	1	0	0	0.1	1	0
hsa-miR-3184	0	0.1	1	0	0	0.1	1	0	0	0.1	1	0	0	0.1	1	0	0	0.1	1	0	0	0.1	1	0	0	0.1	1	0	0	0.1	1	0
hsa-miR-3185	0	0.1	1	0	0	0.1	1	0	0	0.1	1	0	0	8.81792	2.55663	1	0	0.1	1	0	0	0.1	1	0	0	0.1	1	0	0	0.1	1	0
hsa-miR-3186-3p	0	0.1	1	0	0	0.1	1	0	0	0.1	1	0	0	0.1	1	0	0	0.1	1	0	0	0.1	1	0	0	0.1	1	0	0	0.1	1	0
hsa-miR-3186-5p	0	0.1	1	0	0	0.1	1	0	0	0.1	1	0	0	0.1	1	0	0	0.1	1	0	0	0.1	1	0	0	0.1	1	0	0	0.1	1	0
hsa-miR-3187	0	0.1	1	0	0	0.1	1	0	0	0.1	1	0	0	8.15708	2.53291	1	0	0.1	1	0	0	0.1	1	0	0	0.1	1	0	0	0.1	1	0
hsa-miR-3188	0	107.044	8.28635	1	0	80.174	6.46166	1	0	33.9955	4.05907	1	0	169.507	12.4723	1	0	102.844	7.89847	1	0	66.4809	5.89128	1	0	101.399	7.95857	1	0	62.2607	5.46488	1
hsa-miR-3189	0	0.1	1	0	0	0.1	1	0	0	0.1	1	0	0	0.1	1	0	0	0.1	1	0	0	0.1	1	0	0	0.1	1	0	0	0.1	1	0
hsa-miR-3190	0	0.1	1	0	0	0.1	1	0	0	0.1	1	0	0	0.1	1	0	0	0.1	1	0	0	0.1	1	0	0	0.1	1	0	0	0.1	1	0
hsa-miR-3191	0	0.1	1	0	0	0.1	1	0	0	0.1	1	0	0	0.1	1	0	0	0.1	1	0	0	0.1	1	0	0	0.1	1	0	0	0.1	1	0
hsa-miR-3192	0	0.1	1	0	0	0.1	1	0	0	0.1	1	0	0	0.1	1	0	0	0.1	1	0	0	0.1	1	0	0	0.1	1	0	0	0.1	1	0
hsa-miR-3193	0	0.1	1	0	0	0.1	1	0	0	0.1	1	0	0	0.1	1	0	0	0.1	1	0	0	0.1	1	0	0	0.1	1	0	0	0.1	1	0
hsa-miR-3194	0	112.523	8.64308	1	0	53.8072	4.89907	1	0	80.5414	6.57435	1	0	99.3788	7.81044	1	0	45.8622	4.44948	1	0	70.7316	6.13951	1	0	131.814	9.94833	1	0	62.1257	5.4565	1
hsa-miR-3195	0	909.905	71.118	1	0	339.709	26.4877	1	0	215.252	16.917	1	0	716.369	56.0327	1	0	137.108	10.705	1	0	259.082	20.8514	1	0	216.613	17.2075	1	0	151.151	11.9844	1
hsa-miR-3196	0	609.722	48.3477	1	0	404.611	31.3856	1	0	278.391	21.2287	1	0	594.552	45.5824	1	0	213.797	16.7825	1	0	301.703	24.3054	1	0	721.853	59.0431	1	0	388.842	31.2089	1
hsa-miR-3197	0	0.1	1	0	0	0.1	1	0	0	0.1	1	0	0	0.1	1	0	0	0.1	1	0	0	0.1	1	0	0	0.1	1	0	0	0.1	1	0
hsa-miR-3198	0	179.401	13.152	1	0	118.617	8.98164	1	0	361.685	25.9289	1	0	129.103	9.75259	1	0	103.39	7.97337	1	0	134.456	10.1783	1	0	240.625	17.4168	1	0	130.183	9.7773	1
hsa-miR-3199	0	0.1	1	0	0	0.1	1	0	0	0.1	1	0	0	0.1	1	0	0	0.1	1	0	0	0.1	1	0	0	0.1	1	0	0	0.1	1	0
hsa-miR-32	0	13.2142	1.91909	1	0	4.92469	1.20077	1	0	0.1	1	0	0	11.1678	1.87236	1	0	3.88425	1.14095	1	0	0.1	1	0	0	0.1	1	0	0	0.1	1	0
hsa-miR-32*	0	0.1	1	0	0	0.1	1	0	0	0.1	1	0	0	0.1	1	0	0	0.1	1	0	0	0.1	1	0	0	0.1	1	0	0	0.1	1	0
hsa-miR-3200-3p	0	0.1	1	0	0	0.1	1	0	0	0.1	1	0	0	0.1	1	0	0	0.1	1	0	0	0.1	1	0	0	0.1	1	0	0	0.1	1	0
hsa-miR-3200-5p	0	0.1	1	0	0	0.1	1	0	0	0.1	1	0	0	0.1	1	0	0	0.1	1	0	0	0.1	1	0	0	0.1	1	0	0	0.1	1	0
hsa-miR-3201	0	0.1	1	0	0	0.1	1	0	0	0.1	1	0	0	0.1	1	0	0	0.1	1	0	0	0.1	1	0	0	0.1	1	0	0	0.1	1	0
hsa-miR-3202	0	39.5404	4.48055	1	0	9.3447	2.37112	1	0	15.9458	2.81134	1	0	24.8763	3.87053	1	0	0.1	1	0	0	12.7309	2.81467	1	0	34.081	4.31503	1	0	9.77644	2.49183	1
hsa-miR-320a	0	414.769	34.5949	1	0	234.18	19.4526	1	0	256.694	22.1844	1	0	301.543	24.4512	1	0	613.912	53.4802	1	0	435.258	36.9404	1	0	474.116	40.0628	1	0	458.713	39.2732	1
hsa-miR-320b	0	985.656	81.3344	1	0	543.007	44.3372	1	0	712.643	60.3264	1	0	681.173	56.5049	1	0	1572.42	130.444	1	0	1041.66	84.7533	1	0	1193.54	98.1553	1	0	1154.91	95.0466	1
hsa-miR-320c	0	1225.23	110.063	1	0	630.202	56.5285	1	0	883.7	82.5233	1	0	939.291	82.3526	1	0	1594.08	149.828	1	0	1139.77	105.162	1	0	1333.16	124.065	1	0	1125.16	103.619	1
hsa-miR-320d	0	1594.85	128.347	1	0	822.797	64.9921	1	0	1232.33	102.977	1	0	1187.29	94.2839	1	0	2361.09	196.358	1	0	1578.74	125.813	1	0	1895.51	151.79	1	0	1529.34	126.563	1
hsa-miR-320e	0	1230.43	104.583	1	0	638.833	53.479	1	0	933.713	81.6005	1	0	933.672	77.5205	1	0	1780.08	154.616	1	0	1203.39	101.579	1	0	1444.8	122.26	1	0	1162.95	100.962	1
hsa-miR-323-3p	0	0.1	1	0	0	0.1	1	0	0	0.1	1	0	0	0.1	1	0	0	0.1	1	0	0	0.1	1	0	0	0.1	1	0	0	0.1	1	0
hsa-miR-323-5p	0	0.1	1	0	0	0.1	1	0	0	0.1	1	0	0	0.1	1	0	0	0.1	1	0	0	0.1	1	0	0	0.1	1	0	0	0.1	1	0
hsa-miR-323b-3p	0	0.1	1	0	0	0.1	1	0	0	0.1	1	0	0	0.1	1	0	0	0.1	1	0	0	0.1	1	0	0	0.1	1	0	0	0.1	1	0
hsa-miR-323b-5p	0	0.1	1	0	0	0.1	1	0	0	0.1	1	0	0	0.1	1	0	0	0.1	1	0	0	0.1	1	0	0	0.1	1	0	0	0.1	1	0
hsa-miR-324-3p	0	214.229	15.5355	1	0	219.201	15.886	1	0	199.853	14.6324	1	0	206.674	15.0119	1	0	331.591	24.2905	1	0	227.775	16.5484	1	0	278.971	20.1246	1	0	168.257	12.4617	1
hsa-miR-324-5p	0	124.604	9.62614	1	0	91.4442	7.2822	1	0	142.137	10.9657	1	0	121.455	9.40059	1	0	175.05	13.2194	1	0	96.9904	7.85579	1	0	125.847	9.75597	1	0	41.073	4.40437	1
hsa-miR-325	0	0.1	1	0	0	0.1	1	0	0	0.1	1	0	0	0.1	1	0	0	0.1	1	0	0	0.1	1	0	0	0.1	1	0	0	0.1	1	0
hsa-miR-326	0	0.1	1	0	0	4.8407	1.60304	1	0	0.1	1	0	0	5.88538	1.77968	1	0	7.30553	1.67856	1	0	0.1	1	0	0	5.90671	1.80011	1	0	0.1	1	0
hsa-miR-328	0	0.1	1	0	0	0.1	1	0	0	0.1	1	0	0	0.1	1	0	0	13.7229	2.55537	1	0	0.1	1	0	0	0.1	1	0	0	0.1	1	0
hsa-miR-329	0	0.1	1	0	0	0.1	1	0	0	0.1	1	0	0	0.1	1	0	0	7.38079	2.2629	1	0	0.1	1	0	0	0.1	1	0	0	0.1	1	0
hsa-miR-330-3p	0	0.1	1	0	0	0.1	1	0	0	8.71895	2.46896	1	0	10.6888	2.63077	1	0	7.78467	2.29371	1	0	0.1	1	0	0	9.30034	2.60259	1	0	0.1	1	0
hsa-miR-330-5p	0	0.1	1	0	0	0.1	1	0	0	0.1	1	0	0	0.1	1	0	0	0.1	1	0	0	0.1	1	0	0	0.1	1	0	0	0.1	1	0
hsa-miR-331-3p	0	367.617	28.444	1	0	138.777	10.9585	1	0	351.662	27.0576	1	0	350.373	26.8869	1	0	549.322	42.6856	1	0	230.849	18.1108	1	0	332.601	25.8361	1	0	67.5772	6.07213	1
hsa-miR-331-5p	0	0.1	1	0	0	0.1	1	0	0	0.1	1	0	0	0.1	1	0	0	0.1	1	0	0	0.1	1	0	0	0.1	1	0	0	0.1	1	0
hsa-miR-335	0	97.3138	9.61087	1	0	26.642	3.44678	1	0	8.69608	2.47423	1	0	49.4816	5.50642	1	0	37.0775	4.28727	1	0	26.2057	3.63259	1	0	42.4271	4.89583	1	0	0.1	1	0
hsa-miR-335*	0	22.0341	2.4546	1	0	3.74245	1.15406	1	0	0.1	1	0	0	0.1	1	0	0	0.1	1	0	0	0.1	1	0	0	0.1	1	0	0	0.1	1	0
hsa-miR-337-3p	0	0.1	1	0	0	0.1	1	0	0	0.1	1	0	0	0.1	1	0	0	21.8922	3.45317	1	0	0.1	1	0	0	0.1	1	0	0	0.1	1	0
hsa-miR-337-5p	0	9.72449	2.55293	1	0	0.1	1	0	0	8.27957	2.46198	1	0	0.1	1	0	0	133.579	10.5125	1	0	11.319	2.75525	1	0	14.433	2.8287	1	0	0.1	1	0
hsa-miR-338-3p	0	91.2621	8.31121	1	0	216.717	18.6794	1	0	65.2802	6.466	1	0	43.8568	5	1	0	384.693	32.5197	1	0	128.874	11.0464	1	0	461.924	37.7951	1	0	63.8827	6.27143	1
hsa-miR-338-5p	0	0.1	1	0	0	0.1	1	0	0	0.1	1	0	0	0.1	1	0	0	0.1	1	0	0	0.1	1	0	0	0.1	1	0	0	0.1	1	0
hsa-miR-339-3p	0	3.88738	1.24096	1	0	0.1	1	0	0	0.1	1	0	0	0.1	1	0	0	4.79316	1.17449	1	0	0.1	1	0	0	0.1	1	0	0	0.1	1	0
hsa-miR-339-5p	0	0.1	1	0	0	0.1	1	0	0	0.1	1	0	0	0.1	1	0	0	0.1	1	0	0	0.1	1	0	0	0.1	1	0	0	0.1	1	0
hsa-miR-33a	0	15.3874	2.8236	1	0	9.39539	2.37246	1	0	0.1	1	0	0	0.1	1	0	0	7.54855	2.27504	1	0	0.1	1	0	0	0.1	1	0	0	0.1	1	0
hsa-miR-33a*	0	0.1	1	0	0	0.1	1	0	0	0.1	1	0	0	0.1	1	0	0	0.1	1	0	0	0.1	1	0	0	0.1	1	0	0	0.1	1	0
hsa-miR-33b	0	0.1	1	0	0	0.1	1	0	0	0.1	1	0	0	0.1	1	0	0	0.1	1	0	0	0.1	1	0	0	0.1	1	0	0	0.1	1	0
hsa-miR-33b*	0	18.2434	2.53686	1	0	16.8866	2.34295	1	0	36.6944	2.96208	1	0	19.8472	2.59732	1	0	30.3747	2.64252	1	0	9.47815	1.90147	1	0	13.849	2.25711	1	0	22.1135	2.53988	1
hsa-miR-340	0	59.2616	5.35918	1	0	26.501	3.60314	1	0	40.8806	4.36967	1	0	84.1701	6.85348	1	0	48.8851	4.60973	1	0	26.6163	4.02356	1	0	41.2574	4.51023	1	0	0.1	1	0
hsa-miR-340*	0	11.7679	2.63903	1	0	0.1	1	0	0	8.63989	2.46758	1	0	18.341	3.01705	1	0	10.6286	2.39396	1	0	0.1	1	0	0	10.0824	2.63354	1	0	0.1	1	0
hsa-miR-342-3p	0	178.004	15.3695	1	0	115.654	9.78902	1	0	317.186	26.9174	1	0	304.392	25.3934	1	0	758.773	60.9964	1	0	508.692	40.731	1	0	522.57	43.4076	1	0	238.812	18.3452	1
hsa-miR-342-5p	0	0.1	1	0	0	0.1	1	0	0	17.1176	2.88594	1	0	13.2902	2.74186	1	0	30.868	3.77129	1	0	26.2112	3.63728	1	0	27.0883	3.65156	1	0	10.1505	2.50034	1
hsa-miR-345	0	4.35155	1.25616	1	0	0.1	1	0	0	0.1	1	0	0	0.1	1	0	0	0.1	1	0	0	0.1	1	0	0	0.1	1	0	0	5.24875	1.26041	1
hsa-miR-346	0	0.1	1	0	0	0.1	1	0	0	0.1	1	0	0	0.1	1	0	0	0.1	1	0	0	0.1	1	0	0	0.1	1	0	0	0.1	1	0
hsa-miR-34a	0	1609.29	122.4	1	0	1365.06	103.185	1	0	961.076	75.0357	1	0	1719.37	130.942	1	0	2922.44	232.275	1	0	764.317	58.2897	1	0	1296.32	99.322	1	0	377.968	29.2395	1
hsa-miR-34a*	0	10.6609	2.59102	1	0	12.2574	2.50393	1	0	0.1	1	0	0	12.6794	2.70949	1	0	19.4165	2.90235	1	0	0.1	1	0	0	0.1	1	0	0	0.1	1	0
hsa-miR-34b	0	0.1	1	0	0	0.1	1	0	0	0.1	1	0	0	0.1	1	0	0	0.1	1	0	0	0.1	1	0	0	0.1	1	0	0	0.1	1	0
hsa-miR-34b*	0	73.0718	6.20605	1	0	59.0386	5.22947	1	0	62.3394	5.52519	1	0	106.469	8.32965	1	0	290.697	21.0491	1	0	38.3925	4.4741	1	0	59.3525	5.4635	1	0	16.6881	3.44504	1
hsa-miR-34c-3p	0	0.1	1	0	0	0.1	1	0	0	0.1	1	0	0	0.1	1	0	0	0.1	1	0	0	0.1	1	0	0	0.1	1	0	0	0.1	1	0
hsa-miR-34c-5p	0	0.1	1	0	0	0.1	1	0	0	0.1	1	0	0	0.1	1	0	0	0.1	1	0	0	0.1	1	0	0	0.1	1	0	0	0.1	1	0
hsa-miR-3605-3p	0	0.1	1	0	0	0.1	1	0	0	0.1	1	0	0	0.1	1	0	0	0.1	1	0	0	0.1	1	0	0	0.1	1	0	0	0.1	1	0
hsa-miR-3605-5p	0	17.4437	3.56185	1	0	0.1	1	0	0	24.4148	3.73309	1	0	0.1	1	0	0	0.1	1	0	0	0.1	1	0	0	8.55319	2.58644	1	0	0.1	1	0
hsa-miR-3606	0	0.1	1	0	0	0.1	1	0	0	0.1	1	0	0	0.1	1	0	0	0.1	1	0	0	0.1	1	0	0	0.1	1	0	0	0.1	1	0
hsa-miR-3607-3p	0	0.1	1	0	0	0.1	1	0	0	0.1	1	0	0	0.1	1	0	0	0.1	1	0	0	0.1	1	0	0	0.1	1	0	0	0.1	1	0
hsa-miR-3607-5p	0	7.56592	2.47614	1	0	0.1	1	0	0	0.1	1	0	0	0.1	1	0	0	19.5505	3.33481	1	0	0.1	1	0	0	0.1	1	0	0	0.1	1	0
hsa-miR-3609	0	9.69147	2.54778	1	0	0.1	1	0	0	0.1	1	0	0	0.1	1	0	0	0.1	1	0	0	0.1	1	0	0	12.1097	2.72252	1	0	0.1	1	0
hsa-miR-361-3p	0	42.649	4.87997	1	0	23.91	3.23417	1	0	51.8546	5.68649	1	0	64.7626	6.69363	1	0	123.845	11.5861	1	0	58.8427	6.40123	1	0	100.217	9.62141	1	0	24.7825	3.3671	1
hsa-miR-361-5p	0	247.446	20.7236	1	0	123.235	10.3522	1	0	140.948	12.2393	1	0	94.7655	8.52882	1	0	358.349	29.7676	1	0	200.35	16.6242	1	0	241.154	20.1552	1	0	104.563	8.96036	1
hsa-miR-3610	0	60.2434	5.42923	1	0	33.2655	3.88792	1	0	8.19364	2.45899	1	0	66.2428	5.79809	1	0	23.6914	3.46651	1	0	21.8034	3.87986	1	0	25.0697	3.87916	1	0	28.3744	3.81526	1
hsa-miR-3611	0	0.1	1	0	0	0.1	1	0	0	0.1	1	0	0	0.1	1	0	0	0.1	1	0	0	0.1	1	0	0	0.1	1	0	0	0.1	1	0
hsa-miR-3612	0	0.1	1	0	0	0.1	1	0	0	0.1	1	0	0	0.1	1	0	0	0.1	1	0	0	0.1	1	0	0	0.1	1	0	0	0.1	1	0
hsa-miR-3613-3p	0	0.1	1	0	0	0.1	1	0	0	0.1	1	0	0	0.1	1	0	0	14.0305	3.19447	1	0	0.1	1	0	0	0.1	1	0	0	0.1	1	0
hsa-miR-3613-5p	0	0.1	1	0	0	0.1	1	0	0	0.1	1	0	0	0.1	1	0	0	0.1	1	0	0	0.1	1	0	0	0.1	1	0	0	0.1	1	0
hsa-miR-3614-3p	0	0.1	1	0	0	0.1	1	0	0	0.1	1	0	0	0.1	1	0	0	0.1	1	0	0	0.1	1	0	0	0.1	1	0	0	0.1	1	0
hsa-miR-3614-5p	0	16.3755	3.53747	1	0	0.1	1	0	0	27.8393	3.8178	1	0	0.1	1	0	0	15.2484	3.2208	1	0	0.1	1	0	0	21.2401	3.75212	1	0	18.7267	3.49044	1
hsa-miR-3615	0	0.1	1	0	0	0.1	1	0	0	0.1	1	0	0	0.1	1	0	0	0.1	1	0	0	0.1	1	0	0	0.1	1	0	0	0.1	1	0
hsa-miR-3616-3p	0	0.1	1	0	0	0.1	1	0	0	0.1	1	0	0	0.1	1	0	0	0.1	1	0	0	0.1	1	0	0	0.1	1	0	0	0.1	1	0
hsa-miR-3616-5p	0	0.1	1	0	0	0.1	1	0	0	0.1	1	0	0	0.1	1	0	0	0.1	1	0	0	0.1	1	0	0	0.1	1	0	0	0.1	1	0
hsa-miR-3617	0	0.1	1	0	0	0.1	1	0	0	0.1	1	0	0	0.1	1	0	0	0.1	1	0	0	0.1	1	0	0	0.1	1	0	0	0.1	1	0
hsa-miR-3618	0	0.1	1	0	0	0.1	1	0	0	0.1	1	0	0	0.1	1	0	0	0.1	1	0	0	0.1	1	0	0	0.1	1	0	0	0.1	1	0
hsa-miR-3619	0	0.1	1	0	0	0.1	1	0	0	0.1	1	0	0	0.1	1	0	0	0.1	1	0	0	0.1	1	0	0	0.1	1	0	0	0.1	1	0
hsa-miR-362-3p	0	79.7898	7.02457	1	0	42.4383	4.47131	1	0	59.6174	5.77688	1	0	88.3749	7.54984	1	0	55.3451	5.3601	1	0	38.4105	4.627	1	0	73.1481	6.5869	1	0	11.102	2.54896	1
hsa-miR-362-5p	0	131.569	10.9543	1	0	45.6915	4.78645	1	0	57.4011	5.73835	1	0	62.4983	6.06082	1	0	48.6606	5.04401	1	0	44.034	5.02502	1	0	78.7131	7.15424	1	0	18.2293	2.92	1
hsa-miR-3620	0	0.1	1	0	0	0.1	1	0	0	0.1	1	0	0	0.1	1	0	0	8.23153	2.30202	1	0	0.1	1	0	0	0.1	1	0	0	7.31409	2.4002	1
hsa-miR-3621	0	0.1	1	0	0	0.1	1	0	0	0.1	1	0	0	0.1	1	0	0	0.1	1	0	0	0.1	1	0	0	0.1	1	0	0	0.1	1	0
hsa-miR-3622a-3p	0	0.1	1	0	0	0.1	1	0	0	0.1	1	0	0	0.1	1	0	0	0.1	1	0	0	0.1	1	0	0	0.1	1	0	0	0.1	1	0
hsa-miR-3622a-5p	0	0.1	1	0	0	0.1	1	0	0	0.1	1	0	0	0.1	1	0	0	0.1	1	0	0	0.1	1	0	0	0.1	1	0	0	0.1	1	0
hsa-miR-3622b-3p	0	0.1	1	0	0	0.1	1	0	0	0.1	1	0	0	0.1	1	0	0	0.1	1	0	0	0.1	1	0	0	0.1	1	0	0	0.1	1	0
hsa-miR-3622b-5p	0	8.69648	2.51554	1	0	0.1	1	0	0	0.1	1	0	0	0.1	1	0	0	0.1	1	0	0	0.1	1	0	0	7.65462	2.54937	1	0	0.1	1	0
hsa-miR-363	0	46.3189	4.74341	1	0	0.1	1	0	0	24.0895	3.71331	1	0	28.0138	3.95321	1	0	60.6614	5.35009	1	0	25.0612	3.98515	1	0	27.8642	3.98691	1	0	0.1	1	0
hsa-miR-363*	0	0.1	1	0	0	0.1	1	0	0	0.1	1	0	0	0.1	1	0	0	0.1	1	0	0	0.1	1	0	0	0.1	1	0	0	0.1	1	0
hsa-miR-3646	0	18.4514	3.5871	1	0	9.73834	2.39321	1	0	9.73399	2.51148	1	0	10.244	2.60899	1	0	17.8745	3.28767	1	0	0.1	1	0	0	27.4809	3.99129	1	0	22.4174	3.61128	1
hsa-miR-3647-3p	0	0.1	1	0	0	0.1	1	0	0	0.1	1	0	0	0.1	1	0	0	0.1	1	0	0	0.1	1	0	0	0.1	1	0	0	0.1	1	0
hsa-miR-3647-5p	0	0.1	1	0	0	0.1	1	0	0	0.1	1	0	0	0.1	1	0	0	0.1	1	0	0	0.1	1	0	0	0.1	1	0	0	0.1	1	0
hsa-miR-3648	0	90.5446	7.42274	1	0	64.4642	5.57206	1	0	39.2677	4.3239	1	0	74.9387	6.39162	1	0	28.537	3.6619	1	0	23.2883	3.92816	1	0	27.1043	3.94258	1	0	35.2024	4.11785	1
hsa-miR-3649	0	0.1	1	0	0	0.1	1	0	0	0.1	1	0	0	0.1	1	0	0	0.1	1	0	0	0.1	1	0	0	0.1	1	0	0	0.1	1	0
hsa-miR-365	0	276.693	20.0757	1	0	64.3266	5.53553	1	0	109.062	8.44738	1	0	113.095	8.75774	1	0	411.438	29.4858	1	0	123.563	9.5176	1	0	204.122	14.9732	1	0	38.6899	4.2403	1
hsa-miR-365*	0	0.1	1	0	0	0.1	1	0	0	0.1	1	0	0	0.1	1	0	0	0.1	1	0	0	0.1	1	0	0	0.1	1	0	0	0.1	1	0
hsa-miR-3650	0	0.1	1	0	0	0.1	1	0	0	0.1	1	0	0	0.1	1	0	0	0.1	1	0	0	0.1	1	0	0	0.1	1	0	0	0.1	1	0
hsa-miR-3651	0	311.296	26.916	1	0	156.358	13.4509	1	0	85.2279	8.22044	1	0	170.71	14.8683	1	0	65.7655	6.51974	1	0	123.42	10.9671	1	0	131.837	11.7019	1	0	112.771	10.2621	1
hsa-miR-3652	0	161.215	13.0187	1	0	53.6523	5.13514	1	0	84.1634	7.27396	1	0	143.164	11.4229	1	0	34.6877	4.00246	1	0	84.1133	7.42186	1	0	128.554	10.3343	1	0	86.6313	7.35188	1
hsa-miR-3653	0	54.8982	5.34067	1	0	23.9434	3.56925	1	0	18.1078	2.93877	1	0	36.8545	4.46234	1	0	155.109	11.9635	1	0	122.036	9.7045	1	0	104.658	8.43682	1	0	153.223	11.5002	1
hsa-miR-3654	0	20.7762	3.67613	1	0	25.348	3.5706	1	0	23.7844	3.69264	1	0	7.7487	2.52077	1	0	0.1	1	0	0	0.1	1	0	0	7.94145	2.5602	1	0	22.2935	3.60242	1
hsa-miR-3655	0	0.1	1	0	0	0.1	1	0	0	0.1	1	0	0	0.1	1	0	0	0.1	1	0	0	0.1	1	0	0	0.1	1	0	0	0.1	1	0
hsa-miR-3656	0	1413.11	100.86	1	0	737.693	52.6739	1	0	805.218	57.5562	1	0	1312.71	93.7625	1	0	868.566	61.758	1	0	790.876	56.5285	1	0	724.948	51.7123	1	0	905.67	64.7045	1
hsa-miR-3657	0	0.1	1	0	0	0.1	1	0	0	0.1	1	0	0	0.1	1	0	0	0.1	1	0	0	0.1	1	0	0	0.1	1	0	0	0.1	1	0
hsa-miR-3658	0	0.1	1	0	0	0.1	1	0	0	0.1	1	0	0	0.1	1	0	0	0.1	1	0	0	0.1	1	0	0	0.1	1	0	0	0.1	1	0
hsa-miR-3659	0	0.1	1	0	0	0.1	1	0	0	0.1	1	0	0	0.1	1	0	0	0.1	1	0	0	0.1	1	0	0	0.1	1	0	0	0.1	1	0
hsa-miR-3660	0	0.1	1	0	0	0.1	1	0	0	0.1	1	0	0	0.1	1	0	0	0.1	1	0	0	0.1	1	0	0	0.1	1	0	0	0.1	1	0
hsa-miR-3661	0	0.1	1	0	0	0.1	1	0	0	0.1	1	0	0	0.1	1	0	0	0.1	1	0	0	0.1	1	0	0	0.1	1	0	0	0.1	1	0
hsa-miR-3662	0	0.1	1	0	0	0.1	1	0	0	0.1	1	0	0	0.1	1	0	0	0.1	1	0	0	0.1	1	0	0	0.1	1	0	0	0.1	1	0
hsa-miR-3663-3p	0	252.307	18.8319	1	0	208.485	15.261	1	0	139.537	11.188	1	0	301.013	21.8699	1	0	64.5343	5.56284	1	0	98.3202	8.48042	1	0	133.733	10.886	1	0	120.587	10.1974	1
hsa-miR-3663-5p	0	0.1	1	0	0	0.1	1	0	0	0.1	1	0	0	0.1	1	0	0	0.1	1	0	0	0.1	1	0	0	0.1	1	0	0	13.5548	2.65769	1
hsa-miR-3664	0	0.1	1	0	0	0.1	1	0	0	0.1	1	0	0	0.1	1	0	0	0.1	1	0	0	0.1	1	0	0	0.1	1	0	0	0.1	1	0
hsa-miR-3665	0	1849.78	133.19	1	0	1365.22	98.3972	1	0	771.617	57.0523	1	0	2255.37	162.79	1	0	1060.99	76.2074	1	0	975.324	70.8603	1	0	1238.83	89.7044	1	0	1191.72	86.9385	1
hsa-miR-3666	0	0.1	1	0	0	0.1	1	0	0	0.1	1	0	0	0.1	1	0	0	0.1	1	0	0	0.1	1	0	0	0.1	1	0	0	0.1	1	0
hsa-miR-3667-3p	0	0.1	1	0	0	0.1	1	0	0	0.1	1	0	0	0.1	1	0	0	0.1	1	0	0	0.1	1	0	0	0.1	1	0	0	0.1	1	0
hsa-miR-3667-5p	0	51.7105	4.95546	1	0	18.743	3.35369	1	0	38.3047	4.2521	1	0	30.514	4.02393	1	0	0.1	1	0	0	24.2987	3.94329	1	0	36.6564	4.30917	1	0	20.9669	3.55641	1
hsa-miR-3668	0	0.1	1	0	0	0.1	1	0	0	0.1	1	0	0	0.1	1	0	0	0.1	1	0	0	0.1	1	0	0	0.1	1	0	0	0.1	1	0
hsa-miR-3669	0	0.1	1	0	0	0.1	1	0	0	0.1	1	0	0	0.1	1	0	0	0.1	1	0	0	0.1	1	0	0	0.1	1	0	0	0.1	1	0
hsa-miR-367	0	0.1	1	0	0	0.1	1	0	0	0.1	1	0	0	0.1	1	0	0	0.1	1	0	0	0.1	1	0	0	0.1	1	0	0	0.1	1	0
hsa-miR-367*	0	0.1	1	0	0	0.1	1	0	0	0.1	1	0	0	0.1	1	0	0	0.1	1	0	0	0.1	1	0	0	0.1	1	0	0	0.1	1	0
hsa-miR-3670	0	0.1	1	0	0	0.1	1	0	0	0.1	1	0	0	0.1	1	0	0	0.1	1	0	0	0.1	1	0	0	0.1	1	0	0	0.1	1	0
hsa-miR-3671	0	0.1	1	0	0	0.1	1	0	0	0.1	1	0	0	0.1	1	0	0	0.1	1	0	0	0.1	1	0	0	0.1	1	0	0	0.1	1	0
hsa-miR-3672	0	0.1	1	0	0	0.1	1	0	0	0.1	1	0	0	0.1	1	0	0	0.1	1	0	0	0.1	1	0	0	0.1	1	0	0	0.1	1	0
hsa-miR-3673	0	0.1	1	0	0	0.1	1	0	0	0.1	1	0	0	0.1	1	0	0	0.1	1	0	0	0.1	1	0	0	0.1	1	0	0	0.1	1	0
hsa-miR-3674	0	0.1	1	0	0	0.1	1	0	0	0.1	1	0	0	0.1	1	0	0	0.1	1	0	0	0.1	1	0	0	0.1	1	0	0	0.1	1	0
hsa-miR-3675-3p	0	0.1	1	0	0	0.1	1	0	0	11.8684	2.28642	1	0	0.1	1	0	0	32.5891	3.12114	1	0	0.1	1	0	0	0.1	1	0	0	28.5563	3.11004	1
hsa-miR-3675-5p	0	0.1	1	0	0	0.1	1	0	0	0.1	1	0	0	0.1	1	0	0	0.1	1	0	0	0.1	1	0	0	0.1	1	0	0	0.1	1	0
hsa-miR-3676	0	7.47338	2.48588	1	0	0.1	1	0	0	18.3404	3.52954	1	0	19.3275	3.66493	1	0	29.9369	3.6994	1	0	0.1	1	0	0	0.1	1	0	0	30.719	3.89314	1
hsa-miR-3677	0	0.1	1	0	0	0.1	1	0	0	0.1	1	0	0	0.1	1	0	0	0.1	1	0	0	0.1	1	0	0	0.1	1	0	0	0.1	1	0
hsa-miR-3678-3p	0	0.1	1	0	0	0.1	1	0	0	0.1	1	0	0	0.1	1	0	0	0.1	1	0	0	0.1	1	0	0	0.1	1	0	0	0.1	1	0
hsa-miR-3678-5p	0	0.1	1	0	0	0.1	1	0	0	0.1	1	0	0	0.1	1	0	0	0.1	1	0	0	0.1	1	0	0	0.1	1	0	0	0.1	1	0
hsa-miR-3679-3p	0	0.1	1	0	0	0.1	1	0	0	0.1	1	0	0	8.2846	2.53703	1	0	9.70459	2.35843	1	0	0.1	1	0	0	0.1	1	0	0	10.9009	2.53169	1
hsa-miR-3679-5p	0	1013.27	73.3629	1	0	403.276	29.623	1	0	687.119	49.8369	1	0	636.188	46.8328	1	0	273.259	19.8207	1	0	517.583	37.4881	1	0	830.417	60.0212	1	0	439.138	31.9231	1
hsa-miR-3680	0	0.1	1	0	0	0.1	1	0	0	0.1	1	0	0	0.1	1	0	0	0.1	1	0	0	0.1	1	0	0	0.1	1	0	0	0.1	1	0
hsa-miR-3680*	0	8.3486	2.50504	1	0	0.1	1	0	0	8.99952	2.48759	1	0	0.1	1	0	0	0.1	1	0	0	0.1	1	0	0	0.1	1	0	0	0.1	1	0
hsa-miR-3681	0	0.1	1	0	0	0.1	1	0	0	0.1	1	0	0	0.1	1	0	0	0.1	1	0	0	0.1	1	0	0	0.1	1	0	0	0.1	1	0
hsa-miR-3681*	0	0.1	1	0	0	0.1	1	0	0	0.1	1	0	0	0.1	1	0	0	0.1	1	0	0	0.1	1	0	0	0.1	1	0	0	0.1	1	0
hsa-miR-3682	0	33.4169	4.09672	1	0	7.07785	2.29032	1	0	37.7068	4.22025	1	0	27.0775	3.89421	1	0	15.8076	3.23426	1	0	65.5927	5.8524	1	0	32.4862	4.14315	1	0	45.8128	4.57667	1
hsa-miR-3683	0	0.1	1	0	0	0.1	1	0	0	0.1	1	0	0	0.1	1	0	0	0.1	1	0	0	0.1	1	0	0	0.1	1	0	0	0.1	1	0
hsa-miR-3684	0	0.1	1	0	0	0.1	1	0	0	0.1	1	0	0	0.1	1	0	0	0.1	1	0	0	0.1	1	0	0	0.1	1	0	0	0.1	1	0
hsa-miR-3685	0	0.1	1	0	0	0.1	1	0	0	0.1	1	0	0	0.1	1	0	0	0.1	1	0	0	0.1	1	0	0	0.1	1	0	0	0.1	1	0
hsa-miR-3686	0	0.1	1	0	0	0.1	1	0	0	0.1	1	0	0	0.1	1	0	0	0.1	1	0	0	0.1	1	0	0	0.1	1	0	0	0.1	1	0
hsa-miR-3687	0	0.1	1	0	0	0.1	1	0	0	0.1	1	0	0	0.1	1	0	0	0.1	1	0	0	0.1	1	0	0	0.1	1	0	0	0.1	1	0
hsa-miR-3688	0	0.1	1	0	0	0.1	1	0	0	0.1	1	0	0	0.1	1	0	0	0.1	1	0	0	0.1	1	0	0	0.1	1	0	0	0.1	1	0
hsa-miR-3689a-3p	0	0.1	1	0	0	0.1	1	0	0	0.1	1	0	0	0.1	1	0	0	0.1	1	0	0	0.1	1	0	0	0.1	1	0	0	0.1	1	0
hsa-miR-3689a-5p	0	0.1	1	0	0	0.1	1	0	0	0.1	1	0	0	0.1	1	0	0	0.1	1	0	0	0.1	1	0	0	0.1	1	0	0	0.1	1	0
hsa-miR-3689b*	0	0.1	1	0	0	0.1	1	0	0	0.1	1	0	0	0.1	1	0	0	0.1	1	0	0	0.1	1	0	0	0.1	1	0	0	0.1	1	0
hsa-miR-369-3p	0	0.1	1	0	0	0.1	1	0	0	0.1	1	0	0	0.1	1	0	0	0.1	1	0	0	0.1	1	0	0	0.1	1	0	0	0.1	1	0
hsa-miR-369-5p	0	0.1	1	0	0	0.1	1	0	0	0.1	1	0	0	0.1	1	0	0	15.4315	2.63855	1	0	0.1	1	0	0	0.1	1	0	0	0.1	1	0
hsa-miR-3690	0	0.1	1	0	0	0.1	1	0	0	0.1	1	0	0	0.1	1	0	0	0.1	1	0	0	0.1	1	0	0	0.1	1	0	0	0.1	1	0
hsa-miR-3691	0	0.1	1	0	0	0.1	1	0	0	0.1	1	0	0	0.1	1	0	0	0.1	1	0	0	0.1	1	0	0	0.1	1	0	0	0.1	1	0
hsa-miR-3692	0	0.1	1	0	0	0.1	1	0	0	0.1	1	0	0	0.1	1	0	0	0.1	1	0	0	0.1	1	0	0	0.1	1	0	0	0.1	1	0
hsa-miR-3692*	0	0.1	1	0	0	0.1	1	0	0	0.1	1	0	0	0.1	1	0	0	0.1	1	0	0	0.1	1	0	0	0.1	1	0	0	7.20124	2.39886	1
hsa-miR-370	0	13.1679	2.71182	1	0	9.53822	2.38855	1	0	12.4675	2.62695	1	0	0.1	1	0	0	19.4897	2.90504	1	0	9.38642	2.68046	1	0	13.0479	2.75566	1	0	17.384	2.87128	1
hsa-miR-371-3p	0	0.1	1	0	0	0.1	1	0	0	0.1	1	0	0	0.1	1	0	0	0.1	1	0	0	0.1	1	0	0	0.1	1	0	0	0.1	1	0
hsa-miR-371-5p	0	94.2863	5.42726	1	0	56.3441	3.67465	1	0	51.4574	3.51648	1	0	86.6375	5.09055	1	0	34.409	2.79287	1	0	52.2923	3.73555	1	0	54.0533	3.69139	1	0	42.4386	3.1716	1
hsa-miR-3713	0	0.1	1	0	0	0.1	1	0	0	0.1	1	0	0	0.1	1	0	0	0.1	1	0	0	0.1	1	0	0	0.1	1	0	0	0.1	1	0
hsa-miR-3714	0	0.1	1	0	0	0.1	1	0	0	0.1	1	0	0	0.1	1	0	0	0.1	1	0	0	0.1	1	0	0	0.1	1	0	0	0.1	1	0
hsa-miR-372	0	0.1	1	0	0	0.1	1	0	0	0.1	1	0	0	0.1	1	0	0	0.1	1	0	0	0.1	1	0	0	0.1	1	0	0	0.1	1	0
hsa-miR-373	0	0.1	1	0	0	0.1	1	0	0	0.1	1	0	0	0.1	1	0	0	0.1	1	0	0	0.1	1	0	0	0.1	1	0	0	0.1	1	0
hsa-miR-373*	0	16.1256	2.86079	1	0	14.419	2.61698	1	0	0.1	1	0	0	22.5411	3.29418	1	0	8.40621	2.30772	1	0	0.1	1	0	0	7.66139	2.54513	1	0	0.1	1	0
hsa-miR-374a	0	532.688	38.0149	1	0	213.137	15.4359	1	0	272.119	19.6828	1	0	374.799	26.8114	1	0	222.332	16.0925	1	0	145.391	10.9324	1	0	244.294	17.7002	1	0	42.8632	4.43211	1
hsa-miR-374a*	0	0.1	1	0	0	0.1	1	0	0	0.1	1	0	0	0.1	1	0	0	0.1	1	0	0	0.1	1	0	0	0.1	1	0	0	0.1	1	0
hsa-miR-374b	0	292.807	21.0008	1	0	152.516	11.2358	1	0	141.303	10.5302	1	0	208.219	15.1181	1	0	253.979	18.2351	1	0	136.19	10.2754	1	0	223.087	16.1604	1	0	45.5461	4.56207	1
hsa-miR-374b*	0	0.1	1	0	0	0.1	1	0	0	0.1	1	0	0	0.1	1	0	0	0.1	1	0	0	0.1	1	0	0	0.1	1	0	0	0.1	1	0
hsa-miR-374c	0	9.68651	2.55044	1	0	7.4663	2.30048	1	0	0.1	1	0	0	7.76272	2.52108	1	0	12.641	2.49302	1	0	0.1	1	0	0	0.1	1	0	0	0.1	1	0
hsa-miR-375	0	295.146	27.1319	1	0	384.956	34.9269	1	0	0.1	1	0	0	771.167	70.1016	1	0	27.7907	3.51034	1	0	744.4	66.7044	1	0	2621.75	237.013	1	0	415.07	35.9446	1
hsa-miR-376a	0	47.4146	5.22039	1	0	21.0828	3.04112	1	0	38.1321	4.50978	1	0	21.3027	3.22199	1	0	492.603	39.0208	1	0	63.0661	6.28385	1	0	87.6504	8.04705	1	0	39.2821	4.42832	1
hsa-miR-376a*	0	0.1	1	0	0	0.1	1	0	0	0.1	1	0	0	0.1	1	0	0	10.619	2.39493	1	0	0.1	1	0	0	0.1	1	0	0	0.1	1	0
hsa-miR-376b	0	0.1	1	0	0	0.1	1	0	0	0.1	1	0	0	0.1	1	0	0	19.179	2.8837	1	0	0.1	1	0	0	0.1	1	0	0	0.1	1	0
hsa-miR-376c	0	70.5191	6.21075	1	0	34.4809	4.00059	1	0	53.605	5.19502	1	0	34.0015	4.22927	1	0	713.556	53.0466	1	0	92.8089	7.67839	1	0	146.718	11.2833	1	0	49.7591	4.88242	1
hsa-miR-377	0	29.5755	3.79119	1	0	15.6088	2.68858	1	0	22.0995	3.20452	1	0	15.8076	2.86991	1	0	127.657	11.5784	1	0	11.1712	2.74935	1	0	19.0224	3.0895	1	0	13.4844	2.6566	1
hsa-miR-377*	0	0.1	1	0	0	0.1	1	0	0	0.1	1	0	0	0.1	1	0	0	6.06291	1.23045	1	0	0.1	1	0	0	0.1	1	0	0	0.1	1	0
hsa-miR-378	0	111.3	9.2144	1	0	160.071	12.804	1	0	39.3939	4.42981	1	0	127.684	10.5202	1	0	44.4432	4.61443	1	0	227.957	18.0477	1	0	306.754	24.0152	1	0	184.611	14.6169	1
hsa-miR-378*	0	27.7038	3.9073	1	0	37.6319	4.12331	1	0	7.75412	2.44558	1	0	38.4707	4.40319	1	0	19.7743	3.35862	1	0	72.3939	6.31505	1	0	106.886	8.49357	1	0	37.727	4.24359	1
hsa-miR-378b	0	36.7858	4.35248	1	0	13.7501	2.57952	1	0	38.0437	4.412	1	0	23.0377	3.80413	1	0	11.9187	2.46359	1	0	34.2465	4.3599	1	0	35.9167	4.35136	1	0	10.0803	2.50439	1
hsa-miR-378c	0	0.1	1	0	0	0.1	1	0	0	0.1	1	0	0	0.1	1	0	0	0.1	1	0	0	0.1	1	0	0	0.1	1	0	0	0.1	1	0
hsa-miR-379	0	0.1	1	0	0	0.1	1	0	0	0.1	1	0	0	0.1	1	0	0	88.6575	7.78489	1	0	0.1	1	0	0	0.1	1	0	0	0.1	1	0
hsa-miR-379*	0	0.1	1	0	0	0.1	1	0	0	0.1	1	0	0	0.1	1	0	0	0.1	1	0	0	0.1	1	0	0	0.1	1	0	0	0.1	1	0
hsa-miR-380	0	0.1	1	0	0	0.1	1	0	0	0.1	1	0	0	0.1	1	0	0	0.1	1	0	0	0.1	1	0	0	0.1	1	0	0	0.1	1	0
hsa-miR-380*	0	0.1	1	0	0	0.1	1	0	0	0.1	1	0	0	0.1	1	0	0	0.1	1	0	0	0.1	1	0	0	0.1	1	0	0	0.1	1	0
hsa-miR-381	0	10.3427	2.58916	1	0	7.29623	2.29641	1	0	11.9614	2.60737	1	0	0.1	1	0	0	319.773	24.5751	1	0	38.8083	4.64056	1	0	49.4237	5.08061	1	0	34.2839	4.14743	1
hsa-miR-382	0	0.1	1	0	0	0.1	1	0	0	0.1	1	0	0	0.1	1	0	0	49.2205	5.37245	1	0	0.1	1	0	0	0.1	1	0	0	0.1	1	0
hsa-miR-383	0	0.1	1	0	0	0.1	1	0	0	0.1	1	0	0	0.1	1	0	0	0.1	1	0	0	0.1	1	0	0	0.1	1	0	0	0.1	1	0
hsa-miR-384	0	0.1	1	0	0	0.1	1	0	0	0.1	1	0	0	0.1	1	0	0	0.1	1	0	0	0.1	1	0	0	0.1	1	0	0	0.1	1	0
hsa-miR-3907	0	7.59765	2.48257	1	0	0.1	1	0	0	11.9796	2.61259	1	0	0.1	1	0	0	0.1	1	0	0	0.1	1	0	0	0.1	1	0	0	0.1	1	0
hsa-miR-3908	0	0.1	1	0	0	0.1	1	0	0	0.1	1	0	0	0.1	1	0	0	0.1	1	0	0	0.1	1	0	0	0.1	1	0	0	0.1	1	0
hsa-miR-3909	0	0.1	1	0	0	0.1	1	0	0	0.1	1	0	0	0.1	1	0	0	0.1	1	0	0	0.1	1	0	0	0.1	1	0	0	0.1	1	0
hsa-miR-3910	0	0.1	1	0	0	0.1	1	0	0	0.1	1	0	0	0.1	1	0	0	0.1	1	0	0	0.1	1	0	0	0.1	1	0	0	0.1	1	0
hsa-miR-3911	0	172.415	12.7576	1	0	77.3448	6.33081	1	0	132.486	10.0825	1	0	148.843	11.1663	1	0	50.3256	4.70245	1	0	91.1271	7.39897	1	0	120.053	9.25311	1	0	72.2757	6.08395	1
hsa-miR-3912	0	0.1	1	0	0	0.1	1	0	0	0.1	1	0	0	0.1	1	0	0	0.1	1	0	0	0.1	1	0	0	0.1	1	0	0	0.1	1	0
hsa-miR-3913	0	0.1	1	0	0	0.1	1	0	0	0.1	1	0	0	0.1	1	0	0	0.1	1	0	0	0.1	1	0	0	0.1	1	0	0	0.1	1	0
hsa-miR-3914	0	0.1	1	0	0	0.1	1	0	0	0.1	1	0	0	0.1	1	0	0	0.1	1	0	0	0.1	1	0	0	0.1	1	0	0	0.1	1	0
hsa-miR-3915	0	0.1	1	0	0	0.1	1	0	0	0.1	1	0	0	0.1	1	0	0	0.1	1	0	0	0.1	1	0	0	0.1	1	0	0	0.1	1	0
hsa-miR-3916	0	0.1	1	0	0	0.1	1	0	0	0.1	1	0	0	0.1	1	0	0	0.1	1	0	0	0.1	1	0	0	0.1	1	0	0	0.1	1	0
hsa-miR-3917	0	64.38	5.66121	1	0	25.3653	3.56246	1	0	89.6984	7.14668	1	0	56.0841	5.22784	1	0	21.1114	3.38108	1	0	37.2064	4.423	1	0	58.9702	5.41037	1	0	28.9369	3.827	1
hsa-miR-3918	0	0.1	1	0	0	0.1	1	0	0	0.1	1	0	0	0.1	1	0	0	0.1	1	0	0	0.1	1	0	0	0.1	1	0	0	0.1	1	0
hsa-miR-3919	0	0.1	1	0	0	0.1	1	0	0	0.1	1	0	0	0.1	1	0	0	0.1	1	0	0	0.1	1	0	0	0.1	1	0	0	0.1	1	0
hsa-miR-3920	0	0.1	1	0	0	0.1	1	0	0	0.1	1	0	0	0.1	1	0	0	0.1	1	0	0	0.1	1	0	0	0.1	1	0	0	0.1	1	0
hsa-miR-3921	0	0.1	1	0	0	0.1	1	0	0	0.1	1	0	0	0.1	1	0	0	0.1	1	0	0	0.1	1	0	0	0.1	1	0	0	0.1	1	0
hsa-miR-3922	0	0.1	1	0	0	0.1	1	0	0	0.1	1	0	0	0.1	1	0	0	0.1	1	0	0	0.1	1	0	0	0.1	1	0	0	0.1	1	0
hsa-miR-3923	0	0.1	1	0	0	0.1	1	0	0	0.1	1	0	0	0.1	1	0	0	30.6195	3.05907	1	0	27.1856	3.2992	1	0	0.1	1	0	0	44.5815	3.68823	1
hsa-miR-3924	0	0.1	1	0	0	0.1	1	0	0	0.1	1	0	0	0.1	1	0	0	0.1	1	0	0	0.1	1	0	0	0.1	1	0	0	0.1	1	0
hsa-miR-3925	0	0.1	1	0	0	0.1	1	0	0	0.1	1	0	0	0.1	1	0	0	0.1	1	0	0	0.1	1	0	0	0.1	1	0	0	0.1	1	0
hsa-miR-3926	0	56.0733	5.18432	1	0	20.5944	3.41227	1	0	59.3004	5.32222	1	0	34.6798	4.18607	1	0	23.4563	3.46827	1	0	28.0557	4.06502	1	0	46.9048	4.77938	1	0	18.3196	3.4816	1
hsa-miR-3927	0	0.1	1	0	0	0.1	1	0	0	0.1	1	0	0	0.1	1	0	0	0.1	1	0	0	0.1	1	0	0	0.1	1	0	0	0.1	1	0
hsa-miR-3928	0	0.1	1	0	0	0.1	1	0	0	0.1	1	0	0	0.1	1	0	0	0.1	1	0	0	0.1	1	0	0	0.1	1	0	0	0.1	1	0
hsa-miR-3929	0	0.1	1	0	0	0.1	1	0	0	0.1	1	0	0	0.1	1	0	0	0.1	1	0	0	0.1	1	0	0	0.1	1	0	0	0.1	1	0
hsa-miR-3934	0	52.9356	5.2465	1	0	10.4033	2.41762	1	0	48.462	4.9155	1	0	23.7677	3.80387	1	0	17.076	3.27431	1	0	27.5541	4.11189	1	0	46.9198	4.95734	1	0	24.7601	3.70767	1
hsa-miR-3935	0	0.1	1	0	0	0.1	1	0	0	15.8271	3.45877	1	0	0.1	1	0	0	0.1	1	0	0	0.1	1	0	0	0.1	1	0	0	0.1	1	0
hsa-miR-3936	0	0.1	1	0	0	0.1	1	0	0	0.1	1	0	0	0.1	1	0	0	0.1	1	0	0	0.1	1	0	0	0.1	1	0	0	0.1	1	0
hsa-miR-3937	0	84.3196	6.84502	1	0	44.6977	4.42866	1	0	26.9464	3.7862	1	0	81.6978	6.70842	1	0	24.2963	3.50192	1	0	33.9356	4.29087	1	0	47.2426	4.80161	1	0	34.127	4.03704	1
hsa-miR-3938	0	0.1	1	0	0	0.1	1	0	0	0.1	1	0	0	0.1	1	0	0	0.1	1	0	0	0.1	1	0	0	0.1	1	0	0	0.1	1	0
hsa-miR-3939	0	0.1	1	0	0	0.1	1	0	0	0.1	1	0	0	0.1	1	0	0	0.1	1	0	0	0.1	1	0	0	0.1	1	0	0	0.1	1	0
hsa-miR-3940	0	0.1	1	0	0	0.1	1	0	0	0.1	1	0	0	0.1	1	0	0	8.71687	2.31476	1	0	0.1	1	0	0	0.1	1	0	0	7.39694	2.39942	1
hsa-miR-3941	0	0.1	1	0	0	0.1	1	0	0	0.1	1	0	0	0.1	1	0	0	0.1	1	0	0	0.1	1	0	0	0.1	1	0	0	0.1	1	0
hsa-miR-3942	0	0.1	1	0	0	0.1	1	0	0	0.1	1	0	0	0.1	1	0	0	0.1	1	0	0	0.1	1	0	0	0.1	1	0	0	0.1	1	0
hsa-miR-3943	0	0.1	1	0	0	0.1	1	0	0	0.1	1	0	0	0.1	1	0	0	0.1	1	0	0	0.1	1	0	0	0.1	1	0	0	0.1	1	0
hsa-miR-3944	0	0.1	1	0	0	0.1	1	0	0	0.1	1	0	0	0.1	1	0	0	0.1	1	0	0	0.1	1	0	0	0.1	1	0	0	0.1	1	0
hsa-miR-3945	0	0.1	1	0	0	0.1	1	0	0	0.1	1	0	0	0.1	1	0	0	0.1	1	0	0	0.1	1	0	0	0.1	1	0	0	0.1	1	0
hsa-miR-409-3p	0	8.98232	2.52047	1	0	0.1	1	0	0	18.3371	3.51667	1	0	0.1	1	0	0	86.9156	6.92339	1	0	0.1	1	0	0	9.77771	2.62143	1	0	7.22254	2.39902	1
hsa-miR-409-5p	0	0.1	1	0	0	0.1	1	0	0	0.1	1	0	0	0.1	1	0	0	13.0376	1.7742	1	0	0.1	1	0	0	0.1	1	0	0	0.1	1	0
hsa-miR-410	0	0.1	1	0	0	0.1	1	0	0	0.1	1	0	0	0.1	1	0	0	92.0973	7.20737	1	0	0.1	1	0	0	0.1	1	0	0	0.1	1	0
hsa-miR-411	0	0.1	1	0	0	0.1	1	0	0	0.1	1	0	0	0.1	1	0	0	50.9176	4.86941	1	0	0.1	1	0	0	0.1	1	0	0	0.1	1	0
hsa-miR-411*	0	0.1	1	0	0	0.1	1	0	0	0.1	1	0	0	0.1	1	0	0	3.42202	1.12493	1	0	0.1	1	0	0	0.1	1	0	0	0.1	1	0
hsa-miR-412	0	0.1	1	0	0	0.1	1	0	0	0.1	1	0	0	0.1	1	0	0	0.1	1	0	0	0.1	1	0	0	0.1	1	0	0	0.1	1	0
hsa-miR-421	0	10.8742	2.60146	1	0	0.1	1	0	0	0.1	1	0	0	0.1	1	0	0	0.1	1	0	0	0.1	1	0	0	0.1	1	0	0	0.1	1	0
hsa-miR-422a	0	0.1	1	0	0	0.1	1	0	0	0.1	1	0	0	0.1	1	0	0	0.1	1	0	0	0.1	1	0	0	0.1	1	0	0	0.1	1	0
hsa-miR-423-3p	0	0.1	1	0	0	0.1	1	0	0	0.1	1	0	0	0.1	1	0	0	0.1	1	0	0	0.1	1	0	0	0.1	1	0	0	0.1	1	0
hsa-miR-423-5p	0	104.863	9.68041	1	0	64.1776	6.17976	1	0	33.1072	4.04575	1	0	82.6152	7.81226	1	0	109.896	9.72446	1	0	100.909	9.01317	1	0	127.873	11.3173	1	0	83.8862	7.34682	1
hsa-miR-424	0	386.476	29.7219	1	0	329.946	25.0748	1	0	346.51	27.2703	1	0	203.608	16.0265	1	0	209.192	16.6608	1	0	75.331	6.85405	1	0	63.4418	6.03799	1	0	36.9103	4.34676	1
hsa-miR-424*	0	183.645	17.3536	1	0	9.85598	2.3959	1	0	184.096	17.4584	1	0	0.1	1	0	0	15.126	2.63397	1	0	48.4527	5.46203	1	0	80.0709	8.37299	1	0	12.4984	2.59972	1
hsa-miR-425	0	696.571	52.7501	1	0	459.128	35.583	1	0	229.385	18.1065	1	0	388.955	29.6312	1	0	204.475	15.7663	1	0	300.44	22.7285	1	0	481.449	36.3467	1	0	170.742	13.0081	1
hsa-miR-425*	0	0.1	1	0	0	0.1	1	0	0	0.1	1	0	0	0.1	1	0	0	16.19	3.23769	1	0	0.1	1	0	0	0.1	1	0	0	15.8794	3.42021	1
hsa-miR-4251	0	0.1	1	0	0	0.1	1	0	0	0.1	1	0	0	0.1	1	0	0	0.1	1	0	0	0.1	1	0	0	0.1	1	0	0	0.1	1	0
hsa-miR-4252	0	0.1	1	0	0	0.1	1	0	0	0.1	1	0	0	0.1	1	0	0	0.1	1	0	0	0.1	1	0	0	0.1	1	0	0	0.1	1	0
hsa-miR-4253	0	38.7203	4.32236	1	0	21.2202	3.44026	1	0	21.4095	3.61283	1	0	35.0512	4.20484	1	0	0.1	1	0	0	25.4107	3.98806	1	0	30.3318	4.05579	1	0	15.1257	3.40144	1
hsa-miR-4254	0	0.1	1	0	0	0.1	1	0	0	0.1	1	0	0	0.1	1	0	0	0.1	1	0	0	0.1	1	0	0	0.1	1	0	0	0.1	1	0
hsa-miR-4255	0	0.1	1	0	0	0.1	1	0	0	0.1	1	0	0	0.1	1	0	0	0.1	1	0	0	0.1	1	0	0	0.1	1	0	0	0.1	1	0
hsa-miR-4256	0	0.1	1	0	0	0.1	1	0	0	0.1	1	0	0	0.1	1	0	0	0.1	1	0	0	0.1	1	0	0	0.1	1	0	0	0.1	1	0
hsa-miR-4257	0	91.5322	7.36034	1	0	51.5381	4.90377	1	0	78.9876	6.48775	1	0	61.1414	5.5437	1	0	42.022	4.35169	1	0	58.3814	5.50771	1	0	85.2674	7.00795	1	0	52.2922	4.98718	1
hsa-miR-4258	0	0.1	1	0	0	0.1	1	0	0	0.1	1	0	0	0.1	1	0	0	0.1	1	0	0	0.1	1	0	0	0.1	1	0	0	0.1	1	0
hsa-miR-4259	0	10.1358	2.57077	1	0	0.1	1	0	0	10.5028	2.54905	1	0	0.1	1	0	0	13.0707	2.51131	1	0	13.8838	2.87922	1	0	11.5531	2.69439	1	0	16.3853	2.81619	1
hsa-miR-4260	0	0.1	1	0	0	0.1	1	0	0	0.1	1	0	0	0.1	1	0	0	0.1	1	0	0	0.1	1	0	0	0.1	1	0	0	0.1	1	0
hsa-miR-4261	0	12.5334	2.67488	1	0	0.1	1	0	0	14.8174	2.7555	1	0	0.1	1	0	0	0.1	1	0	0	0.1	1	0	0	11.4352	2.68563	1	0	0.1	1	0
hsa-miR-4262	0	0.1	1	0	0	0.1	1	0	0	0.1	1	0	0	0.1	1	0	0	0.1	1	0	0	0.1	1	0	0	0.1	1	0	0	0.1	1	0
hsa-miR-4263	0	0.1	1	0	0	0.1	1	0	0	0.1	1	0	0	0.1	1	0	0	0.1	1	0	0	0.1	1	0	0	0.1	1	0	0	0.1	1	0
hsa-miR-4264	0	0.1	1	0	0	0.1	1	0	0	0.1	1	0	0	0.1	1	0	0	0.1	1	0	0	0.1	1	0	0	0.1	1	0	0	0.1	1	0
hsa-miR-4265	0	0.1	1	0	0	0.1	1	0	0	0.1	1	0	0	0.1	1	0	0	0.1	1	0	0	0.1	1	0	0	0.1	1	0	0	0.1	1	0
hsa-miR-4266	0	0.1	1	0	0	0.1	1	0	0	0.1	1	0	0	0.1	1	0	0	0.1	1	0	0	0.1	1	0	0	0.1	1	0	0	0.1	1	0
hsa-miR-4267	0	0.1	1	0	0	0.1	1	0	0	0.1	1	0	0	0.1	1	0	0	0.1	1	0	0	0.1	1	0	0	0.1	1	0	0	0.1	1	0
hsa-miR-4268	0	0.1	1	0	0	0.1	1	0	0	0.1	1	0	0	0.1	1	0	0	0.1	1	0	0	0.1	1	0	0	0.1	1	0	0	0.1	1	0
hsa-miR-4269	0	0.1	1	0	0	0.1	1	0	0	0.1	1	0	0	0.1	1	0	0	0.1	1	0	0	0.1	1	0	0	0.1	1	0	0	0.1	1	0
hsa-miR-4270	0	1169.48	82.8741	1	0	491.261	34.8963	1	0	336.296	24.04	1	0	1391.95	98.5408	1	0	366.615	26.1381	1	0	414.082	29.5257	1	0	531.16	37.7594	1	0	372.201	26.5391	1
hsa-miR-4271	0	296.985	21.4224	1	0	206.318	14.9705	1	0	178.473	13.1696	1	0	216.639	15.7705	1	0	117.615	8.90751	1	0	142.026	10.7856	1	0	231.915	16.8598	1	0	130.529	9.88449	1
hsa-miR-4272	0	0.1	1	0	0	0.1	1	0	0	0.1	1	0	0	0.1	1	0	0	0.1	1	0	0	0.1	1	0	0	0.1	1	0	0	0.1	1	0
hsa-miR-4273	0	0.1	1	0	0	0.1	1	0	0	0.1	1	0	0	0.1	1	0	0	0.1	1	0	0	0.1	1	0	0	0.1	1	0	0	0.1	1	0
hsa-miR-4274	0	24.973	3.77952	1	0	17.0009	3.31614	1	0	17.4962	3.49668	1	0	30.3947	4.01361	1	0	21.007	3.38698	1	0	0.1	1	0	0	16.8052	3.64237	1	0	23.8906	3.65189	1
hsa-miR-4275	0	0.1	1	0	0	0.1	1	0	0	0.1	1	0	0	0.1	1	0	0	0.1	1	0	0	0.1	1	0	0	0.1	1	0	0	0.1	1	0
hsa-miR-4276	0	0.1	1	0	0	0.1	1	0	0	0.1	1	0	0	0.1	1	0	0	0.1	1	0	0	0.1	1	0	0	0.1	1	0	0	0.1	1	0
hsa-miR-4277	0	0.1	1	0	0	0.1	1	0	0	0.1	1	0	0	0.1	1	0	0	0.1	1	0	0	0.1	1	0	0	0.1	1	0	0	0.1	1	0
hsa-miR-4278	0	0.1	1	0	0	0.1	1	0	0	0.1	1	0	0	0.1	1	0	0	0.1	1	0	0	0.1	1	0	0	0.1	1	0	0	0.1	1	0
hsa-miR-4279	0	0.1	1	0	0	0.1	1	0	0	0.1	1	0	0	0.1	1	0	0	0.1	1	0	0	0.1	1	0	0	0.1	1	0	0	0.1	1	0
hsa-miR-4280	0	0.1	1	0	0	0.1	1	0	0	0.1	1	0	0	0.1	1	0	0	0.1	1	0	0	0.1	1	0	0	0.1	1	0	0	0.1	1	0
hsa-miR-4281	0	9137.89	650.531	1	0	4059.01	288.059	1	0	1670.97	118.431	1	0	9155.49	650.183	1	0	2667.73	189.253	1	0	3318.56	236.032	1	0	4674.01	331.576	1	0	2725.81	193.396	1
hsa-miR-4282	0	0.1	1	0	0	0.1	1	0	0	0.1	1	0	0	0.1	1	0	0	0.1	1	0	0	0.1	1	0	0	0.1	1	0	0	0.1	1	0
hsa-miR-4283	0	0.1	1	0	0	0.1	1	0	0	0.1	1	0	0	0.1	1	0	0	0.1	1	0	0	0.1	1	0	0	0.1	1	0	0	0.1	1	0
hsa-miR-4284	0	4076.3	379.862	1	0	2335.57	218.029	1	0	607.776	56.1536	1	0	1679.7	156.434	1	0	1033.17	95.8959	1	0	1969.92	183.995	1	0	2361.3	220.817	1	0	622.649	57.4791	1
hsa-miR-4285	0	0.1	1	0	0	0.1	1	0	0	0.1	1	0	0	0.1	1	0	0	0.1	1	0	0	0.1	1	0	0	0.1	1	0	0	0.1	1	0
hsa-miR-4286	0	2379.64	219.123	1	0	2216.34	203.626	1	0	4553.29	418.185	1	0	607.046	56.109	1	0	696.454	64.7852	1	0	1168.09	108.181	1	0	1397.22	129.829	1	0	501.355	46.5552	1
hsa-miR-4287	0	0.1	1	0	0	0.1	1	0	0	0.1	1	0	0	0.1	1	0	0	0.1	1	0	0	0.1	1	0	0	0.1	1	0	0	0.1	1	0
hsa-miR-4288	0	0.1	1	0	0	0.1	1	0	0	0.1	1	0	0	0.1	1	0	0	0.1	1	0	0	0.1	1	0	0	0.1	1	0	0	0.1	1	0
hsa-miR-4289	0	0.1	1	0	0	0.1	1	0	0	0.1	1	0	0	0.1	1	0	0	0.1	1	0	0	0.1	1	0	0	0.1	1	0	0	0.1	1	0
hsa-miR-429	0	4090.35	291.159	1	0	1049.24	74.57	1	0	0.1	1	0	0	1472.09	104.711	1	0	130.794	9.78962	1	0	896.733	63.808	1	0	1612.69	114.745	1	0	451.05	32.2067	1
hsa-miR-4290	0	0.1	1	0	0	0.1	1	0	0	0.1	1	0	0	0.1	1	0	0	0.1	1	0	0	0.1	1	0	0	0.1	1	0	0	0.1	1	0
hsa-miR-4291	0	50.8076	5.0383	1	0	20.5332	3.44018	1	0	35.1579	4.2048	1	0	25.8425	3.91131	1	0	69.8056	6.12912	1	0	32.9961	4.31346	1	0	28.4788	4.04985	1	0	37.2265	4.29059	1
hsa-miR-4292	0	0.1	1	0	0	0.1	1	0	0	0.1	1	0	0	0.1	1	0	0	0.1	1	0	0	0.1	1	0	0	0.1	1	0	0	0.1	1	0
hsa-miR-4293	0	0.1	1	0	0	0.1	1	0	0	0.1	1	0	0	0.1	1	0	0	0.1	1	0	0	0.1	1	0	0	0.1	1	0	0	0.1	1	0
hsa-miR-4294	0	9.13023	2.5343	1	0	0.1	1	0	0	0.1	1	0	0	0.1	1	0	0	0.1	1	0	0	0.1	1	0	0	0.1	1	0	0	0.1	1	0
hsa-miR-4295	0	0.1	1	0	0	0.1	1	0	0	0.1	1	0	0	0.1	1	0	0	0.1	1	0	0	0.1	1	0	0	0.1	1	0	0	0.1	1	0
hsa-miR-4296	0	0.1	1	0	0	0.1	1	0	0	0.1	1	0	0	0.1	1	0	0	0.1	1	0	0	0.1	1	0	0	0.1	1	0	0	0.1	1	0
hsa-miR-4297	0	0.1	1	0	0	0.1	1	0	0	0.1	1	0	0	0.1	1	0	0	0.1	1	0	0	0.1	1	0	0	0.1	1	0	0	0.1	1	0
hsa-miR-4298	0	493.319	35.4556	1	0	200.118	14.7554	1	0	440.703	31.9949	1	0	314.608	22.9003	1	0	186.167	13.7008	1	0	263.796	19.3162	1	0	361.8	26.1471	1	0	230.118	16.8968	1
hsa-miR-4299	0	3950.4	279.868	1	0	2586.62	183.318	1	0	665.779	47.3076	1	0	5156.46	365.224	1	0	386.335	27.5345	1	0	2810.52	199.208	1	0	1357.92	96.3658	1	0	577.928	41.0124	1
hsa-miR-4300	0	0.1	1	0	0	0.1	1	0	0	0.1	1	0	0	0.1	1	0	0	0.1	1	0	0	0.1	1	0	0	0.1	1	0	0	0.1	1	0
hsa-miR-4301	0	0.1	1	0	0	0.1	1	0	0	0.1	1	0	0	0.1	1	0	0	0.1	1	0	0	0.1	1	0	0	0.1	1	0	0	0.1	1	0
hsa-miR-4302	0	0.1	1	0	0	0.1	1	0	0	0.1	1	0	0	0.1	1	0	0	0.1	1	0	0	0.1	1	0	0	0.1	1	0	0	0.1	1	0
hsa-miR-4303	0	0.1	1	0	0	0.1	1	0	0	0.1	1	0	0	0.1	1	0	0	0.1	1	0	0	0.1	1	0	0	0.1	1	0	0	0.1	1	0
hsa-miR-4304	0	0.1	1	0	0	0.1	1	0	0	0.1	1	0	0	0.1	1	0	0	0.1	1	0	0	0.1	1	0	0	0.1	1	0	0	0.1	1	0
hsa-miR-4305	0	0.1	1	0	0	0.1	1	0	0	0.1	1	0	0	0.1	1	0	0	0.1	1	0	0	0.1	1	0	0	0.1	1	0	0	0.1	1	0
hsa-miR-4306	0	281.058	20.2814	1	0	150.779	11.2049	1	0	216.017	15.7267	1	0	292.236	21.1699	1	0	177.376	13.1221	1	0	160.104	11.9929	1	0	204.409	14.9236	1	0	80.6278	6.58779	1
hsa-miR-4307	0	0.1	1	0	0	0.1	1	0	0	0.1	1	0	0	0.1	1	0	0	0.1	1	0	0	0.1	1	0	0	0.1	1	0	0	0.1	1	0
hsa-miR-4308	0	0.1	1	0	0	0.1	1	0	0	0.1	1	0	0	0.1	1	0	0	0.1	1	0	0	0.1	1	0	0	0.1	1	0	0	0.1	1	0
hsa-miR-4309	0	0.1	1	0	0	0.1	1	0	0	0.1	1	0	0	0.1	1	0	0	0.1	1	0	0	0.1	1	0	0	0.1	1	0	0	0.1	1	0
hsa-miR-431	0	0.1	1	0	0	0.1	1	0	0	0.1	1	0	0	0.1	1	0	0	0.1	1	0	0	0.1	1	0	0	0.1	1	0	0	0.1	1	0
hsa-miR-431*	0	0.1	1	0	0	3.5817	1.14503	1	0	0.1	1	0	0	0.1	1	0	0	3.9789	1.14548	1	0	0.1	1	0	0	0.1	1	0	0	0.1	1	0
hsa-miR-4310	0	0.1	1	0	0	0.1	1	0	0	0.1	1	0	0	0.1	1	0	0	0.1	1	0	0	0.1	1	0	0	0.1	1	0	0	0.1	1	0
hsa-miR-4311	0	0.1	1	0	0	0.1	1	0	0	0.1	1	0	0	0.1	1	0	0	0.1	1	0	0	0.1	1	0	0	0.1	1	0	0	0.1	1	0
hsa-miR-4312	0	0.1	1	0	0	0.1	1	0	0	0.1	1	0	0	0.1	1	0	0	17.8127	3.28413	1	0	0.1	1	0	0	0.1	1	0	0	17.8438	3.46799	1
hsa-miR-4313	0	21.3133	3.66063	1	0	44.8647	4.42865	1	0	32.9544	4.02139	1	0	28.4686	3.94675	1	0	83.3153	6.63347	1	0	54.0738	5.21853	1	0	43.1872	4.60449	1	0	77.4583	6.36362	1
hsa-miR-4314	0	35.4096	4.19201	1	0	7.1494	2.29766	1	0	25.7403	3.78248	1	0	19.5245	3.66603	1	0	0.1	1	0	0	9.21139	2.66961	1	0	28.4115	4.00622	1	0	0.1	1	0
hsa-miR-4315	0	0.1	1	0	0	0.1	1	0	0	0.1	1	0	0	0.1	1	0	0	0.1	1	0	0	0.1	1	0	0	0.1	1	0	0	0.1	1	0
hsa-miR-4316	0	0.1	1	0	0	0.1	1	0	0	0.1	1	0	0	0.1	1	0	0	0.1	1	0	0	0.1	1	0	0	0.1	1	0	0	0.1	1	0
hsa-miR-4317	0	39.3594	4.59131	1	0	8.95238	2.35477	1	0	16.5338	2.8446	1	0	14.9092	2.82087	1	0	14.112	2.56765	1	0	11.3273	2.75457	1	0	13.922	2.80469	1	0	0.1	1	0
hsa-miR-4318	0	0.1	1	0	0	0.1	1	0	0	0.1	1	0	0	0.1	1	0	0	0.1	1	0	0	0.1	1	0	0	0.1	1	0	0	0.1	1	0
hsa-miR-4319	0	0.1	1	0	0	0.1	1	0	0	0.1	1	0	0	0.1	1	0	0	0.1	1	0	0	0.1	1	0	0	0.1	1	0	0	0.1	1	0
hsa-miR-432	0	0.1	1	0	0	0.1	1	0	0	0.1	1	0	0	0.1	1	0	0	60.7897	5.56053	1	0	0.1	1	0	0	0.1	1	0	0	0.1	1	0
hsa-miR-432*	0	0.1	1	0	0	0.1	1	0	0	0.1	1	0	0	0.1	1	0	0	0.1	1	0	0	0.1	1	0	0	0.1	1	0	0	0.1	1	0
hsa-miR-4320	0	0.1	1	0	0	0.1	1	0	0	0.1	1	0	0	0.1	1	0	0	0.1	1	0	0	0.1	1	0	0	0.1	1	0	0	0.1	1	0
hsa-miR-4321	0	0.1	1	0	0	0.1	1	0	0	0.1	1	0	0	0.1	1	0	0	0.1	1	0	0	0.1	1	0	0	0.1	1	0	0	0.1	1	0
hsa-miR-4322	0	36.2104	4.20992	1	0	23.9205	3.52963	1	0	24.9399	3.71762	1	0	33.3433	4.13663	1	0	0.1	1	0	0	0.1	1	0	0	22.5895	3.79243	1	0	22.5235	3.61094	1
hsa-miR-4323	0	0.1	1	0	0	0.1	1	0	0	13.7537	2.69107	1	0	0.1	1	0	0	21.0478	3.00353	1	0	9.19322	2.67946	1	0	7.77593	2.54791	1	0	19.5914	3.01147	1
hsa-miR-4324	0	0.1	1	0	0	0.1	1	0	0	54.8121	5.69179	1	0	0.1	1	0	0	148.893	14.1023	1	0	10.9607	1.96363	1	0	20.332	2.5762	1	0	0.1	1	0
hsa-miR-4325	0	0.1	1	0	0	0.1	1	0	0	0.1	1	0	0	0.1	1	0	0	0.1	1	0	0	0.1	1	0	0	0.1	1	0	0	0.1	1	0
hsa-miR-4326	0	0.1	1	0	0	0.1	1	0	0	0.1	1	0	0	0.1	1	0	0	0.1	1	0	0	0.1	1	0	0	0.1	1	0	0	0.1	1	0
hsa-miR-4327	0	184.581	13.6056	1	0	143.018	10.607	1	0	90.0053	7.20879	1	0	215.448	15.6504	1	0	67.4667	5.6772	1	0	116.665	9.07359	1	0	114.454	8.95881	1	0	72.1006	6.10588	1
hsa-miR-4328	0	0.1	1	0	0	0.1	1	0	0	0.1	1	0	0	0.1	1	0	0	26.5891	3.42252	1	0	0.1	1	0	0	12.4912	2.73259	1	0	0.1	1	0
hsa-miR-4329	0	0.1	1	0	0	0.1	1	0	0	0.1	1	0	0	0.1	1	0	0	0.1	1	0	0	0.1	1	0	0	0.1	1	0	0	0.1	1	0
hsa-miR-433	0	0.1	1	0	0	0.1	1	0	0	0.1	1	0	0	0.1	1	0	0	14.1978	2.57449	1	0	0.1	1	0	0	0.1	1	0	0	0.1	1	0
hsa-miR-4330	0	0.1	1	0	0	0.1	1	0	0	0.1	1	0	0	0.1	1	0	0	0.1	1	0	0	0.1	1	0	0	0.1	1	0	0	0.1	1	0
hsa-miR-448	0	0.1	1	0	0	0.1	1	0	0	0.1	1	0	0	0.1	1	0	0	0.1	1	0	0	0.1	1	0	0	0.1	1	0	0	0.1	1	0
hsa-miR-449a	0	0.1	1	0	0	108.98	8.70528	1	0	0.1	1	0	0	0.1	1	0	0	0.1	1	0	0	0.1	1	0	0	0.1	1	0	0	0.1	1	0
hsa-miR-449b	0	0.1	1	0	0	0.1	1	0	0	0.1	1	0	0	0.1	1	0	0	0.1	1	0	0	0.1	1	0	0	0.1	1	0	0	0.1	1	0
hsa-miR-449b*	0	0.1	1	0	0	0.1	1	0	0	0.1	1	0	0	0.1	1	0	0	0.1	1	0	0	0.1	1	0	0	0.1	1	0	0	0.1	1	0
hsa-miR-449c	0	0.1	1	0	0	0.1	1	0	0	0.1	1	0	0	0.1	1	0	0	0.1	1	0	0	0.1	1	0	0	0.1	1	0	0	0.1	1	0
hsa-miR-449c*	0	0.1	1	0	0	0.1	1	0	0	0.1	1	0	0	0.1	1	0	0	0.1	1	0	0	0.1	1	0	0	0.1	1	0	0	0.1	1	0
hsa-miR-450a	0	0.1	1	0	0	0.1	1	0	0	0.1	1	0	0	0.1	1	0	0	0.1	1	0	0	0.1	1	0	0	0.1	1	0	0	0.1	1	0
hsa-miR-450b-3p	0	0.1	1	0	0	0.1	1	0	0	0.1	1	0	0	0.1	1	0	0	0.1	1	0	0	0.1	1	0	0	0.1	1	0	0	0.1	1	0
hsa-miR-450b-5p	0	0.1	1	0	0	0.1	1	0	0	0.1	1	0	0	0.1	1	0	0	0.1	1	0	0	0.1	1	0	0	0.1	1	0	0	0.1	1	0
hsa-miR-451	0	24282.1	1749.24	1	0	6505.93	468.621	1	0	4656.69	335.552	1	0	13476.7	972.012	1	0	14284.5	1030.22	1	0	7258.2	522.052	1	0	6102.42	440.642	1	0	485.244	35.1059	1
hsa-miR-452	0	40.2107	4.43661	1	0	0.1	1	0	0	0.1	1	0	0	9.31044	2.57261	1	0	22.1249	3.46127	1	0	0.1	1	0	0	0.1	1	0	0	0.1	1	0
hsa-miR-452*	0	0.1	1	0	0	0.1	1	0	0	0.1	1	0	0	0.1	1	0	0	0.1	1	0	0	0.1	1	0	0	0.1	1	0	0	0.1	1	0
hsa-miR-454	0	53.9835	5.90084	1	0	14.4135	2.61768	1	0	23.2757	3.27936	1	0	36.2273	4.34893	1	0	29.4758	3.65522	1	0	23.7665	3.45928	1	0	30.1774	3.87314	1	0	0.1	1	0
hsa-miR-454*	0	0.1	1	0	0	0.1	1	0	0	0.1	1	0	0	0.1	1	0	0	0.1	1	0	0	0.1	1	0	0	0.1	1	0	0	0.1	1	0
hsa-miR-455-3p	0	89.4228	7.60779	1	0	15.9031	2.70905	1	0	217.558	16.9927	1	0	129.758	10.4913	1	0	73.2692	6.38602	1	0	59.2035	5.73034	1	0	50.7624	5.19193	1	0	8.99685	2.45332	1
hsa-miR-455-5p	0	14.2875	2.76171	1	0	0.1	1	0	0	46.2001	4.86441	1	0	41.491	4.62263	1	0	17.772	2.78702	1	0	8.94126	2.67112	1	0	10.5757	2.6515	1	0	0.1	1	0
hsa-miR-466	0	0.1	1	0	0	0.1	1	0	0	0.1	1	0	0	0.1	1	0	0	0.1	1	0	0	0.1	1	0	0	0.1	1	0	0	0.1	1	0
hsa-miR-483-3p	0	0.1	1	0	0	0.1	1	0	0	0.1	1	0	0	0.1	1	0	0	0.1	1	0	0	0.1	1	0	0	0.1	1	0	0	0.1	1	0
hsa-miR-483-5p	0	507.181	36.7971	1	0	172.634	12.8361	1	0	335.05	24.5594	1	0	263.755	19.4481	1	0	102.097	7.96699	1	0	199.928	14.9029	1	0	364.493	26.3573	1	0	182.803	13.6003	1
hsa-miR-484	0	18.5227	3.00319	1	0	14.3168	2.60594	1	0	36.5272	4.31837	1	0	11.6005	2.66133	1	0	34.0163	3.96893	1	0	15.7223	2.96093	1	0	15.8987	2.91268	1	0	18.7023	3.51236	1
hsa-miR-485-3p	0	0.1	1	0	0	0.1	1	0	0	0.1	1	0	0	0.1	1	0	0	9.21188	2.33998	1	0	0.1	1	0	0	0.1	1	0	0	0.1	1	0
hsa-miR-485-5p	0	0.1	1	0	0	0.1	1	0	0	0.1	1	0	0	0.1	1	0	0	6.74413	1.64831	1	0	0.1	1	0	0	0.1	1	0	0	0.1	1	0
hsa-miR-486-3p	0	0.1	1	0	0	0.1	1	0	0	0.1	1	0	0	0.1	1	0	0	0.1	1	0	0	0.1	1	0	0	0.1	1	0	0	0.1	1	0
hsa-miR-486-5p	0	151.492	11.4894	1	0	48.078	4.62527	1	0	51.6481	4.97143	1	0	94.6636	7.65239	1	0	216.401	16.0125	1	0	88.1065	7.25689	1	0	76.3875	6.49417	1	0	30.6851	3.90799	1
hsa-miR-487a	0	0.1	1	0	0	0.1	1	0	0	0.1	1	0	0	0.1	1	0	0	9.70057	2.35489	1	0	0.1	1	0	0	0.1	1	0	0	0.1	1	0
hsa-miR-487b	0	13.5444	2.72292	1	0	7.1967	2.29651	1	0	9.59061	2.50116	1	0	0.1	1	0	0	196.755	15.6205	1	0	16.3653	2.9937	1	0	37.4284	4.49893	1	0	0.1	1	0
hsa-miR-488	0	0.1	1	0	0	0.1	1	0	0	0.1	1	0	0	0.1	1	0	0	0.1	1	0	0	0.1	1	0	0	0.1	1	0	0	0.1	1	0
hsa-miR-488*	0	0.1	1	0	0	0.1	1	0	0	0.1	1	0	0	0.1	1	0	0	0.1	1	0	0	0.1	1	0	0	0.1	1	0	0	0.1	1	0
hsa-miR-489	0	0.1	1	0	0	0.1	1	0	0	0.1	1	0	0	0.1	1	0	0	0.1	1	0	0	0.1	1	0	0	0.1	1	0	0	0.1	1	0
hsa-miR-490-3p	0	0.1	1	0	0	0.1	1	0	0	0.1	1	0	0	0.1	1	0	0	115.18	8.70562	1	0	0.1	1	0	0	0.1	1	0	0	0.1	1	0
hsa-miR-490-5p	0	0.1	1	0	0	0.1	1	0	0	0.1	1	0	0	0.1	1	0	0	44.2343	4.09758	1	0	0.1	1	0	0	0.1	1	0	0	0.1	1	0
hsa-miR-491-3p	0	0.1	1	0	0	0.1	1	0	0	0.1	1	0	0	0.1	1	0	0	0.1	1	0	0	0.1	1	0	0	0.1	1	0	0	0.1	1	0
hsa-miR-491-5p	0	0.1	1	0	0	0.1	1	0	0	0.1	1	0	0	0.1	1	0	0	0.1	1	0	0	0.1	1	0	0	0.1	1	0	0	0.1	1	0
hsa-miR-492	0	10.3121	2.58099	1	0	0.1	1	0	0	0.1	1	0	0	13.6346	2.76295	1	0	0.1	1	0	0	8.20607	2.64377	1	0	0.1	1	0	0	0.1	1	0
hsa-miR-493	0	0.1	1	0	0	0.1	1	0	0	4.99615	1.26203	1	0	0.1	1	0	0	0.1	1	0	0	0.1	1	0	0	0.1	1	0	0	0.1	1	0
hsa-miR-493*	0	7.46719	2.47636	1	0	0.1	1	0	0	0.1	1	0	0	0.1	1	0	0	30.7065	3.74937	1	0	0.1	1	0	0	0.1	1	0	0	0.1	1	0
hsa-miR-494	0	669.5	51.3105	1	0	1742.04	132.133	1	0	1115.45	84.773	1	0	746.686	57.0174	1	0	2751.71	209.101	1	0	1558.99	118.285	1	0	898.836	68.3961	1	0	5344.91	401.851	1
hsa-miR-495	0	13.0723	2.70538	1	0	0.1	1	0	0	0.1	1	0	0	0.1	1	0	0	132.796	10.9741	1	0	10.9976	2.74499	1	0	18.5385	3.0631	1	0	0.1	1	0
hsa-miR-496	0	0.1	1	0	0	0.1	1	0	0	0.1	1	0	0	0.1	1	0	0	0.1	1	0	0	0.1	1	0	0	0.1	1	0	0	0.1	1	0
hsa-miR-497	0	320.855	27.5791	1	0	78.7201	7.33054	1	0	90.0746	8.58872	1	0	112.167	10.1198	1	0	2037.32	173.993	1	0	542.747	45.2191	1	0	809.742	67.8051	1	0	291.482	24.3954	1
hsa-miR-497*	0	0.1	1	0	0	0.1	1	0	0	0.1	1	0	0	0.1	1	0	0	0.1	1	0	0	0.1	1	0	0	0.1	1	0	0	0.1	1	0
hsa-miR-498	0	36.1525	4.23869	1	0	30.0148	3.77215	1	0	19.6499	3.57459	1	0	33.7863	4.1755	1	0	25.9518	3.56223	1	0	28.2596	4.12142	1	0	30.7002	4.09033	1	0	26.4605	3.74585	1
hsa-miR-499-3p	0	0.1	1	0	0	0.1	1	0	0	0.1	1	0	0	0.1	1	0	0	0.1	1	0	0	0.1	1	0	0	0.1	1	0	0	0.1	1	0
hsa-miR-499-5p	0	0.1	1	0	0	0.1	1	0	0	0.1	1	0	0	0.1	1	0	0	0.1	1	0	0	0.1	1	0	0	0.1	1	0	0	0.1	1	0
hsa-miR-500a	0	11.5235	1.92554	1	0	4.76471	1.49803	1	0	6.07933	1.62326	1	0	7.65609	1.74081	1	0	8.94602	1.66328	1	0	6.3839	1.7578	1	0	9.28404	1.83074	1	0	0.1	1	0
hsa-miR-500a*	0	48.4464	5.17233	1	0	18.9863	2.89648	1	0	38.321	4.57037	1	0	32.9171	4.08333	1	0	59.2301	5.86115	1	0	24.9779	3.54081	1	0	48.734	5.38223	1	0	19.437	2.99899	1
hsa-miR-500b	0	0.1	1	0	0	0.1	1	0	0	0.1	1	0	0	0.1	1	0	0	0.1	1	0	0	0.1	1	0	0	0.1	1	0	0	0.1	1	0
hsa-miR-501-3p	0	22.3866	2.44075	1	0	4.03003	1.1635	1	0	27.7993	2.65164	1	0	22.4562	2.45562	1	0	11.5873	1.73858	1	0	0.1	1	0	0	5.09161	1.31813	1	0	0.1	1	0
hsa-miR-501-5p	0	12.6123	1.91403	1	0	4.31749	1.17007	1	0	6.32845	1.31665	1	0	17.9968	2.37053	1	0	26.7696	2.58814	1	0	6.58522	1.42495	1	0	14.3477	2.27147	1	0	0.1	1	0
hsa-miR-502-3p	0	39.1072	4.51553	1	0	14.9483	2.64123	1	0	23.3993	3.29326	1	0	34.0725	4.29147	1	0	68.6659	6.13519	1	0	29.8511	4.22265	1	0	51.0951	5.23206	1	0	24.9315	3.73755	1
hsa-miR-502-5p	0	20.9154	3.16564	1	0	7.19593	2.29435	1	0	12.981	2.6542	1	0	11.0609	2.6426	1	0	13.2856	2.52252	1	0	8.10798	2.6369	1	0	11.7523	2.69864	1	0	0.1	1	0
hsa-miR-503	0	6.723	1.67386	1	0	9.27045	1.68998	1	0	7.22173	1.66731	1	0	0.1	1	0	0	4.73801	1.47017	1	0	0.1	1	0	0	0.1	1	0	0	0.1	1	0
hsa-miR-504	0	0.1	1	0	0	0.1	1	0	0	0.1	1	0	0	0.1	1	0	0	0.1	1	0	0	0.1	1	0	0	0.1	1	0	0	0.1	1	0
hsa-miR-505	0	51.8388	5.53345	1	0	38.2662	4.44846	1	0	50.3562	5.39484	1	0	44.8492	5.08711	1	0	41.2376	4.58192	1	0	45.5031	5.19463	1	0	47.3047	5.2675	1	0	8.14528	2.42223	1
hsa-miR-505*	0	12.5462	1.93266	1	0	0.1	1	0	0	15.6575	2.00158	1	0	9.88647	1.83798	1	0	9.62145	1.665	1	0	5.37808	1.36734	1	0	10.5393	1.8839	1	0	0.1	1	0
hsa-miR-506	0	0.1	1	0	0	0.1	1	0	0	0.1	1	0	0	0.1	1	0	0	0.1	1	0	0	0.1	1	0	0	0.1	1	0	0	0.1	1	0
hsa-miR-507	0	0.1	1	0	0	0.1	1	0	0	0.1	1	0	0	0.1	1	0	0	0.1	1	0	0	0.1	1	0	0	0.1	1	0	0	0.1	1	0
hsa-miR-508-3p	0	0.1	1	0	0	0.1	1	0	0	0.1	1	0	0	0.1	1	0	0	0.1	1	0	0	0.1	1	0	0	0.1	1	0	0	0.1	1	0
hsa-miR-508-5p	0	0.1	1	0	0	0.1	1	0	0	0.1	1	0	0	0.1	1	0	0	0.1	1	0	0	0.1	1	0	0	0.1	1	0	0	0.1	1	0
hsa-miR-509-3-5p	0	0.1	1	0	0	0.1	1	0	0	0.1	1	0	0	0.1	1	0	0	0.1	1	0	0	0.1	1	0	0	0.1	1	0	0	0.1	1	0
hsa-miR-509-3p	0	0.1	1	0	0	0.1	1	0	0	0.1	1	0	0	0.1	1	0	0	0.1	1	0	0	0.1	1	0	0	0.1	1	0	0	0.1	1	0
hsa-miR-509-5p	0	0.1	1	0	0	0.1	1	0	0	0.1	1	0	0	0.1	1	0	0	0.1	1	0	0	0.1	1	0	0	0.1	1	0	0	0.1	1	0
hsa-miR-510	0	0.1	1	0	0	0.1	1	0	0	0.1	1	0	0	0.1	1	0	0	0.1	1	0	0	0.1	1	0	0	0.1	1	0	0	0.1	1	0
hsa-miR-511	0	0.1	1	0	0	0.1	1	0	0	0.1	1	0	0	0.1	1	0	0	0.1	1	0	0	0.1	1	0	0	0.1	1	0	0	0.1	1	0
hsa-miR-512-3p	0	0.1	1	0	0	0.1	1	0	0	0.1	1	0	0	0.1	1	0	0	0.1	1	0	0	0.1	1	0	0	0.1	1	0	0	0.1	1	0
hsa-miR-512-5p	0	0.1	1	0	0	0.1	1	0	0	0.1	1	0	0	0.1	1	0	0	0.1	1	0	0	0.1	1	0	0	0.1	1	0	0	0.1	1	0
hsa-miR-513a-3p	0	0.1	1	0	0	0.1	1	0	0	0.1	1	0	0	0.1	1	0	0	0.1	1	0	0	0.1	1	0	0	0.1	1	0	0	0.1	1	0
hsa-miR-513a-5p	0	66.059	5.89352	1	0	64.4248	5.63236	1	0	26.2091	3.77904	1	0	26.6823	3.89672	1	0	51.5458	4.81863	1	0	54.2488	5.27974	1	0	47.7246	4.85037	1	0	84.6986	6.85324	1
hsa-miR-513b	0	6.47032	1.34792	1	0	13.3912	1.84044	1	0	0.1	1	0	0	0.1	1	0	0	11.5301	1.75154	1	0	7.23652	1.44893	1	0	5.26523	1.32629	1	0	40.211	3.1179	1
hsa-miR-513c	0	4.04812	1.24971	1	0	8.31334	1.65414	1	0	0.1	1	0	0	0.1	1	0	0	4.98658	1.18383	1	0	4.14266	1.3221	1	0	0.1	1	0	0	30.3363	2.78609	1
hsa-miR-514	0	0.1	1	0	0	0.1	1	0	0	0.1	1	0	0	0.1	1	0	0	0.1	1	0	0	0.1	1	0	0	0.1	1	0	0	0.1	1	0
hsa-miR-514b-3p	0	0.1	1	0	0	0.1	1	0	0	0.1	1	0	0	0.1	1	0	0	0.1	1	0	0	0.1	1	0	0	0.1	1	0	0	0.1	1	0
hsa-miR-514b-5p	0	91.3817	7.6228	1	0	37.3309	4.12906	1	0	47.8708	4.83393	1	0	52.1345	5.11695	1	0	25.8682	3.59464	1	0	48.4149	5.01839	1	0	64.2065	5.93257	1	0	33.9987	4.09501	1
hsa-miR-515-3p	0	0.1	1	0	0	0.1	1	0	0	0.1	1	0	0	0.1	1	0	0	0.1	1	0	0	0.1	1	0	0	0.1	1	0	0	0.1	1	0
hsa-miR-515-5p	0	0.1	1	0	0	0.1	1	0	0	0.1	1	0	0	0.1	1	0	0	0.1	1	0	0	0.1	1	0	0	0.1	1	0	0	0.1	1	0
hsa-miR-516a-3p	0	0.1	1	0	0	0.1	1	0	0	0.1	1	0	0	0.1	1	0	0	0.1	1	0	0	0.1	1	0	0	0.1	1	0	0	0.1	1	0
hsa-miR-516a-5p	0	0.1	1	0	0	0.1	1	0	0	0.1	1	0	0	0.1	1	0	0	0.1	1	0	0	0.1	1	0	0	0.1	1	0	0	0.1	1	0
hsa-miR-516b	0	0.1	1	0	0	0.1	1	0	0	0.1	1	0	0	0.1	1	0	0	0.1	1	0	0	0.1	1	0	0	0.1	1	0	0	0.1	1	0
hsa-miR-517*	0	0.1	1	0	0	0.1	1	0	0	0.1	1	0	0	0.1	1	0	0	0.1	1	0	0	0.1	1	0	0	0.1	1	0	0	0.1	1	0
hsa-miR-517a	0	0.1	1	0	0	0.1	1	0	0	0.1	1	0	0	0.1	1	0	0	0.1	1	0	0	0.1	1	0	0	0.1	1	0	0	0.1	1	0
hsa-miR-517b	0	0.1	1	0	0	0.1	1	0	0	0.1	1	0	0	0.1	1	0	0	0.1	1	0	0	0.1	1	0	0	0.1	1	0	0	0.1	1	0
hsa-miR-517c	0	0.1	1	0	0	0.1	1	0	0	0.1	1	0	0	0.1	1	0	0	0.1	1	0	0	0.1	1	0	0	0.1	1	0	0	0.1	1	0
hsa-miR-518a-3p	0	0.1	1	0	0	0.1	1	0	0	0.1	1	0	0	0.1	1	0	0	0.1	1	0	0	0.1	1	0	0	0.1	1	0	0	0.1	1	0
hsa-miR-518a-5p	0	0.1	1	0	0	0.1	1	0	0	0.1	1	0	0	0.1	1	0	0	0.1	1	0	0	0.1	1	0	0	0.1	1	0	0	0.1	1	0
hsa-miR-518b	0	0.1	1	0	0	0.1	1	0	0	0.1	1	0	0	0.1	1	0	0	0.1	1	0	0	0.1	1	0	0	0.1	1	0	0	0.1	1	0
hsa-miR-518c	0	0.1	1	0	0	0.1	1	0	0	0.1	1	0	0	0.1	1	0	0	0.1	1	0	0	0.1	1	0	0	0.1	1	0	0	0.1	1	0
hsa-miR-518c*	0	0.1	1	0	0	0.1	1	0	0	0.1	1	0	0	0.1	1	0	0	0.1	1	0	0	0.1	1	0	0	0.1	1	0	0	0.1	1	0
hsa-miR-518d-3p	0	0.1	1	0	0	0.1	1	0	0	0.1	1	0	0	0.1	1	0	0	0.1	1	0	0	0.1	1	0	0	0.1	1	0	0	0.1	1	0
hsa-miR-518e	0	0.1	1	0	0	0.1	1	0	0	0.1	1	0	0	0.1	1	0	0	0.1	1	0	0	0.1	1	0	0	0.1	1	0	0	0.1	1	0
hsa-miR-518e*	0	0.1	1	0	0	0.1	1	0	0	0.1	1	0	0	0.1	1	0	0	0.1	1	0	0	0.1	1	0	0	0.1	1	0	0	0.1	1	0
hsa-miR-518f	0	0.1	1	0	0	0.1	1	0	0	0.1	1	0	0	0.1	1	0	0	0.1	1	0	0	0.1	1	0	0	0.1	1	0	0	0.1	1	0
hsa-miR-518f*	0	0.1	1	0	0	0.1	1	0	0	0.1	1	0	0	0.1	1	0	0	0.1	1	0	0	0.1	1	0	0	0.1	1	0	0	0.1	1	0
hsa-miR-519b-3p	0	0.1	1	0	0	0.1	1	0	0	0.1	1	0	0	0.1	1	0	0	0.1	1	0	0	0.1	1	0	0	0.1	1	0	0	0.1	1	0
hsa-miR-519c-3p	0	0.1	1	0	0	0.1	1	0	0	0.1	1	0	0	0.1	1	0	0	0.1	1	0	0	0.1	1	0	0	0.1	1	0	0	0.1	1	0
hsa-miR-519d	0	0.1	1	0	0	0.1	1	0	0	0.1	1	0	0	0.1	1	0	0	0.1	1	0	0	0.1	1	0	0	0.1	1	0	0	0.1	1	0
hsa-miR-519e	0	0.1	1	0	0	0.1	1	0	0	0.1	1	0	0	0.1	1	0	0	0.1	1	0	0	0.1	1	0	0	0.1	1	0	0	0.1	1	0
hsa-miR-519e*	0	0.1	1	0	0	0.1	1	0	0	0.1	1	0	0	0.1	1	0	0	0.1	1	0	0	0.1	1	0	0	0.1	1	0	0	0.1	1	0
hsa-miR-520a-3p	0	0.1	1	0	0	0.1	1	0	0	0.1	1	0	0	0.1	1	0	0	0.1	1	0	0	0.1	1	0	0	0.1	1	0	0	0.1	1	0
hsa-miR-520a-5p	0	0.1	1	0	0	0.1	1	0	0	0.1	1	0	0	0.1	1	0	0	0.1	1	0	0	0.1	1	0	0	0.1	1	0	0	0.1	1	0
hsa-miR-520b	0	0.1	1	0	0	0.1	1	0	0	0.1	1	0	0	0.1	1	0	0	0.1	1	0	0	0.1	1	0	0	0.1	1	0	0	0.1	1	0
hsa-miR-520c-3p	0	0.1	1	0	0	0.1	1	0	0	0.1	1	0	0	0.1	1	0	0	0.1	1	0	0	0.1	1	0	0	0.1	1	0	0	0.1	1	0
hsa-miR-520d-3p	0	0.1	1	0	0	0.1	1	0	0	0.1	1	0	0	0.1	1	0	0	0.1	1	0	0	0.1	1	0	0	0.1	1	0	0	0.1	1	0
hsa-miR-520e	0	0.1	1	0	0	0.1	1	0	0	0.1	1	0	0	0.1	1	0	0	0.1	1	0	0	0.1	1	0	0	0.1	1	0	0	0.1	1	0
hsa-miR-520f	0	0.1	1	0	0	0.1	1	0	0	0.1	1	0	0	0.1	1	0	0	0.1	1	0	0	0.1	1	0	0	0.1	1	0	0	0.1	1	0
hsa-miR-520g	0	0.1	1	0	0	0.1	1	0	0	0.1	1	0	0	0.1	1	0	0	0.1	1	0	0	0.1	1	0	0	0.1	1	0	0	0.1	1	0
hsa-miR-520h	0	0.1	1	0	0	0.1	1	0	0	0.1	1	0	0	0.1	1	0	0	0.1	1	0	0	0.1	1	0	0	0.1	1	0	0	0.1	1	0
hsa-miR-521	0	0.1	1	0	0	0.1	1	0	0	0.1	1	0	0	0.1	1	0	0	0.1	1	0	0	0.1	1	0	0	0.1	1	0	0	0.1	1	0
hsa-miR-522	0	0.1	1	0	0	0.1	1	0	0	0.1	1	0	0	0.1	1	0	0	0.1	1	0	0	0.1	1	0	0	0.1	1	0	0	0.1	1	0
hsa-miR-523	0	0.1	1	0	0	0.1	1	0	0	0.1	1	0	0	0.1	1	0	0	0.1	1	0	0	0.1	1	0	0	0.1	1	0	0	0.1	1	0
hsa-miR-524-3p	0	0.1	1	0	0	0.1	1	0	0	0.1	1	0	0	0.1	1	0	0	0.1	1	0	0	0.1	1	0	0	0.1	1	0	0	0.1	1	0
hsa-miR-525-3p	0	0.1	1	0	0	0.1	1	0	0	0.1	1	0	0	0.1	1	0	0	0.1	1	0	0	0.1	1	0	0	0.1	1	0	0	0.1	1	0
hsa-miR-525-5p	0	0.1	1	0	0	0.1	1	0	0	0.1	1	0	0	0.1	1	0	0	0.1	1	0	0	0.1	1	0	0	0.1	1	0	0	0.1	1	0
hsa-miR-526b	0	10.09	2.57289	1	0	0.1	1	0	0	7.72476	2.43525	1	0	0.1	1	0	0	0.1	1	0	0	0.1	1	0	0	8.13187	2.56426	1	0	0.1	1	0
hsa-miR-526b*	0	0.1	1	0	0	0.1	1	0	0	0.1	1	0	0	0.1	1	0	0	0.1	1	0	0	0.1	1	0	0	0.1	1	0	0	0.1	1	0
hsa-miR-532-3p	0	50.9144	5.61506	1	0	22.2566	3.12207	1	0	26.7505	3.54217	1	0	37.9722	4.50481	1	0	57.9721	5.78355	1	0	30.2319	3.93621	1	0	67.1501	6.79662	1	0	14.7281	2.72537	1
hsa-miR-532-5p	0	194.379	15.7708	1	0	57.6583	5.48324	1	0	84.8482	7.69143	1	0	88.7822	7.76389	1	0	98.9604	8.60394	1	0	72.311	6.71943	1	0	124.31	10.4108	1	0	35.1857	4.31241	1
hsa-miR-539	0	0.1	1	0	0	0.1	1	0	0	0.1	1	0	0	0.1	1	0	0	33.0649	3.14734	1	0	0.1	1	0	0	0.1	1	0	0	0.1	1	0
hsa-miR-541	0	0.1	1	0	0	0.1	1	0	0	0.1	1	0	0	0.1	1	0	0	0.1	1	0	0	0.1	1	0	0	0.1	1	0	0	0.1	1	0
hsa-miR-541*	0	0.1	1	0	0	0.1	1	0	0	0.1	1	0	0	0.1	1	0	0	0.1	1	0	0	0.1	1	0	0	0.1	1	0	0	0.1	1	0
hsa-miR-542-3p	0	5.2969	1.62173	1	0	0.1	1	0	0	10.9051	2.33593	1	0	0.1	1	0	0	0.1	1	0	0	0.1	1	0	0	0.1	1	0	0	0.1	1	0
hsa-miR-542-5p	0	7.48549	2.47807	1	0	0.1	1	0	0	7.39477	2.43323	1	0	0.1	1	0	0	9.69728	2.35972	1	0	0.1	1	0	0	0.1	1	0	0	0.1	1	0
hsa-miR-543	0	0.1	1	0	0	0.1	1	0	0	0.1	1	0	0	0.1	1	0	0	42.5899	4.49621	1	0	0.1	1	0	0	0.1	1	0	0	0.1	1	0
hsa-miR-544	0	0.1	1	0	0	0.1	1	0	0	0.1	1	0	0	0.1	1	0	0	0.1	1	0	0	0.1	1	0	0	0.1	1	0	0	0.1	1	0
hsa-miR-544b	0	0.1	1	0	0	0.1	1	0	0	0.1	1	0	0	0.1	1	0	0	0.1	1	0	0	0.1	1	0	0	0.1	1	0	0	0.1	1	0
hsa-miR-545	0	0.1	1	0	0	0.1	1	0	0	0.1	1	0	0	0.1	1	0	0	0.1	1	0	0	0.1	1	0	0	0.1	1	0	0	0.1	1	0
hsa-miR-545*	0	0.1	1	0	0	0.1	1	0	0	0.1	1	0	0	0.1	1	0	0	0.1	1	0	0	0.1	1	0	0	0.1	1	0	0	0.1	1	0
hsa-miR-548a-3p	0	0.1	1	0	0	0.1	1	0	0	0.1	1	0	0	0.1	1	0	0	0.1	1	0	0	0.1	1	0	0	0.1	1	0	0	0.1	1	0
hsa-miR-548a-5p	0	0.1	1	0	0	0.1	1	0	0	0.1	1	0	0	0.1	1	0	0	0.1	1	0	0	0.1	1	0	0	0.1	1	0	0	0.1	1	0
hsa-miR-548aa	0	0.1	1	0	0	0.1	1	0	0	0.1	1	0	0	0.1	1	0	0	0.1	1	0	0	0.1	1	0	0	0.1	1	0	0	0.1	1	0
hsa-miR-548b-3p	0	0.1	1	0	0	0.1	1	0	0	0.1	1	0	0	0.1	1	0	0	0.1	1	0	0	0.1	1	0	0	0.1	1	0	0	0.1	1	0
hsa-miR-548b-5p	0	0.1	1	0	0	0.1	1	0	0	0.1	1	0	0	0.1	1	0	0	0.1	1	0	0	0.1	1	0	0	0.1	1	0	0	0.1	1	0
hsa-miR-548c-3p	0	0.1	1	0	0	0.1	1	0	0	0.1	1	0	0	0.1	1	0	0	0.1	1	0	0	0.1	1	0	0	0.1	1	0	0	0.1	1	0
hsa-miR-548c-5p	0	0.1	1	0	0	0.1	1	0	0	0.1	1	0	0	0.1	1	0	0	0.1	1	0	0	0.1	1	0	0	0.1	1	0	0	0.1	1	0
hsa-miR-548d-3p	0	0.1	1	0	0	0.1	1	0	0	0.1	1	0	0	0.1	1	0	0	0.1	1	0	0	0.1	1	0	0	0.1	1	0	0	0.1	1	0
hsa-miR-548d-5p	0	0.1	1	0	0	0.1	1	0	0	0.1	1	0	0	0.1	1	0	0	0.1	1	0	0	0.1	1	0	0	0.1	1	0	0	0.1	1	0
hsa-miR-548e	0	0.1	1	0	0	0.1	1	0	0	0.1	1	0	0	0.1	1	0	0	0.1	1	0	0	0.1	1	0	0	0.1	1	0	0	0.1	1	0
hsa-miR-548f	0	0.1	1	0	0	0.1	1	0	0	0.1	1	0	0	0.1	1	0	0	0.1	1	0	0	0.1	1	0	0	0.1	1	0	0	0.1	1	0
hsa-miR-548g	0	0.1	1	0	0	0.1	1	0	0	0.1	1	0	0	0.1	1	0	0	0.1	1	0	0	0.1	1	0	0	0.1	1	0	0	0.1	1	0
hsa-miR-548h	0	0.1	1	0	0	0.1	1	0	0	0.1	1	0	0	0.1	1	0	0	0.1	1	0	0	0.1	1	0	0	0.1	1	0	0	0.1	1	0
hsa-miR-548i	0	0.1	1	0	0	0.1	1	0	0	0.1	1	0	0	0.1	1	0	0	0.1	1	0	0	0.1	1	0	0	0.1	1	0	0	0.1	1	0
hsa-miR-548j	0	0.1	1	0	0	0.1	1	0	0	0.1	1	0	0	0.1	1	0	0	0.1	1	0	0	0.1	1	0	0	0.1	1	0	0	0.1	1	0
hsa-miR-548k	0	0.1	1	0	0	0.1	1	0	0	0.1	1	0	0	0.1	1	0	0	0.1	1	0	0	0.1	1	0	0	0.1	1	0	0	0.1	1	0
hsa-miR-548l	0	0.1	1	0	0	0.1	1	0	0	0.1	1	0	0	0.1	1	0	0	0.1	1	0	0	0.1	1	0	0	0.1	1	0	0	0.1	1	0
hsa-miR-548m	0	0.1	1	0	0	0.1	1	0	0	0.1	1	0	0	0.1	1	0	0	0.1	1	0	0	0.1	1	0	0	0.1	1	0	0	0.1	1	0
hsa-miR-548n	0	0.1	1	0	0	0.1	1	0	0	0.1	1	0	0	0.1	1	0	0	0.1	1	0	0	0.1	1	0	0	0.1	1	0	0	0.1	1	0
hsa-miR-548o	0	0.1	1	0	0	0.1	1	0	0	0.1	1	0	0	0.1	1	0	0	0.1	1	0	0	0.1	1	0	0	0.1	1	0	0	0.1	1	0
hsa-miR-548p	0	0.1	1	0	0	0.1	1	0	0	0.1	1	0	0	0.1	1	0	0	0.1	1	0	0	0.1	1	0	0	0.1	1	0	0	0.1	1	0
hsa-miR-548q	0	27.0802	3.85521	1	0	16.8816	3.30874	1	0	16.1262	3.4665	1	0	45.0639	4.6786	1	0	26.2324	3.56179	1	0	25.9067	3.9935	1	0	27.413	3.95574	1	0	30.5354	3.90681	1
hsa-miR-548s	0	0.1	1	0	0	0.1	1	0	0	0.1	1	0	0	0.1	1	0	0	0.1	1	0	0	0.1	1	0	0	0.1	1	0	0	0.1	1	0
hsa-miR-548t	0	0.1	1	0	0	0.1	1	0	0	0.1	1	0	0	0.1	1	0	0	0.1	1	0	0	0.1	1	0	0	0.1	1	0	0	0.1	1	0
hsa-miR-548u	0	0.1	1	0	0	0.1	1	0	0	0.1	1	0	0	0.1	1	0	0	0.1	1	0	0	0.1	1	0	0	0.1	1	0	0	0.1	1	0
hsa-miR-548v	0	0.1	1	0	0	0.1	1	0	0	0.1	1	0	0	0.1	1	0	0	0.1	1	0	0	0.1	1	0	0	0.1	1	0	0	0.1	1	0
hsa-miR-548w	0	0.1	1	0	0	0.1	1	0	0	0.1	1	0	0	0.1	1	0	0	0.1	1	0	0	0.1	1	0	0	0.1	1	0	0	0.1	1	0
hsa-miR-548x	0	0.1	1	0	0	0.1	1	0	0	0.1	1	0	0	0.1	1	0	0	0.1	1	0	0	0.1	1	0	0	0.1	1	0	0	0.1	1	0
hsa-miR-548y	0	0.1	1	0	0	0.1	1	0	0	0.1	1	0	0	0.1	1	0	0	0.1	1	0	0	0.1	1	0	0	0.1	1	0	0	0.1	1	0
hsa-miR-548z	0	0.1	1	0	0	0.1	1	0	0	0.1	1	0	0	0.1	1	0	0	0.1	1	0	0	0.1	1	0	0	0.1	1	0	0	0.1	1	0
hsa-miR-549	0	0.1	1	0	0	0.1	1	0	0	0.1	1	0	0	0.1	1	0	0	0.1	1	0	0	0.1	1	0	0	0.1	1	0	0	0.1	1	0
hsa-miR-550a	0	6.00326	1.32218	1	0	0.1	1	0	0	20.7055	2.55352	1	0	5.46963	1.32162	1	0	11.4903	1.97191	1	0	5.25376	1.36212	1	0	13.3962	1.97195	1	0	6.22981	1.30136	1
hsa-miR-550a*	0	12.2287	2.34119	1	0	0.1	1	0	0	0.1	1	0	0	26.0194	3.16725	1	0	0.1	1	0	0	0.1	1	0	0	0.1	1	0	0	0.1	1	0
hsa-miR-550b	0	0.1	1	0	0	0.1	1	0	0	0.1	1	0	0	0.1	1	0	0	0.1	1	0	0	0.1	1	0	0	0.1	1	0	0	0.1	1	0
hsa-miR-551a	0	0.1	1	0	0	0.1	1	0	0	0.1	1	0	0	0.1	1	0	0	0.1	1	0	0	0.1	1	0	0	0.1	1	0	0	0.1	1	0
hsa-miR-551b	0	7.43316	1.70247	1	0	0.1	1	0	0	0.1	1	0	0	0.1	1	0	0	553.824	38.1923	1	0	42.8757	3.88072	1	0	16.3611	2.53946	1	0	8.82363	1.72555	1
hsa-miR-551b*	0	0.1	1	0	0	0.1	1	0	0	0.1	1	0	0	0.1	1	0	0	0.1	1	0	0	0.1	1	0	0	0.1	1	0	0	0.1	1	0
hsa-miR-552	0	154.99	8.59525	1	0	0.1	1	0	0	0.1	1	0	0	3.90095	1.26186	1	0	0.1	1	0	0	17.2598	2.4004	1	0	24.6666	2.55999	1	0	0.1	1	0
hsa-miR-553	0	0.1	1	0	0	0.1	1	0	0	0.1	1	0	0	0.1	1	0	0	0.1	1	0	0	0.1	1	0	0	0.1	1	0	0	0.1	1	0
hsa-miR-554	0	0.1	1	0	0	0.1	1	0	0	0.1	1	0	0	0.1	1	0	0	0.1	1	0	0	0.1	1	0	0	0.1	1	0	0	0.1	1	0
hsa-miR-555	0	0.1	1	0	0	0.1	1	0	0	0.1	1	0	0	0.1	1	0	0	0.1	1	0	0	0.1	1	0	0	0.1	1	0	0	0.1	1	0
hsa-miR-556-3p	0	0.1	1	0	0	0.1	1	0	0	0.1	1	0	0	0.1	1	0	0	0.1	1	0	0	0.1	1	0	0	0.1	1	0	0	0.1	1	0
hsa-miR-556-5p	0	0.1	1	0	0	0.1	1	0	0	0.1	1	0	0	0.1	1	0	0	0.1	1	0	0	0.1	1	0	0	0.1	1	0	0	0.1	1	0
hsa-miR-557	0	51.1875	4.92559	1	0	24.9796	3.55397	1	0	34.3987	4.08172	1	0	44.0456	4.60683	1	0	30.0721	3.71003	1	0	28.9265	4.0992	1	0	45.88	4.73431	1	0	25.8001	3.71445	1
hsa-miR-558	0	0.1	1	0	0	0.1	1	0	0	0.1	1	0	0	0.1	1	0	0	0.1	1	0	0	0.1	1	0	0	0.1	1	0	0	0.1	1	0
hsa-miR-559	0	0.1	1	0	0	0.1	1	0	0	0.1	1	0	0	0.1	1	0	0	0.1	1	0	0	0.1	1	0	0	0.1	1	0	0	0.1	1	0
hsa-miR-561	0	0.1	1	0	0	0.1	1	0	0	0.1	1	0	0	0.1	1	0	0	0.1	1	0	0	0.1	1	0	0	0.1	1	0	0	0.1	1	0
hsa-miR-562	0	0.1	1	0	0	0.1	1	0	0	0.1	1	0	0	0.1	1	0	0	0.1	1	0	0	0.1	1	0	0	0.1	1	0	0	0.1	1	0
hsa-miR-563	0	0.1	1	0	0	0.1	1	0	0	0.1	1	0	0	0.1	1	0	0	3.48136	1.12828	1	0	0.1	1	0	0	0.1	1	0	0	0.1	1	0
hsa-miR-564	0	21.1552	2.99893	1	0	0.1	1	0	0	0.1	1	0	0	20.8863	3.02914	1	0	18.332	2.69712	1	0	17.8217	3.07686	1	0	22.0177	3.09167	1	0	17.0739	2.81962	1
hsa-miR-566	0	0.1	1	0	0	0.1	1	0	0	4.48814	1.24173	1	0	0.1	1	0	0	0.1	1	0	0	0.1	1	0	0	0.1	1	0	0	0.1	1	0
hsa-miR-567	0	0.1	1	0	0	0.1	1	0	0	0.1	1	0	0	0.1	1	0	0	0.1	1	0	0	0.1	1	0	0	0.1	1	0	0	0.1	1	0
hsa-miR-568	0	0.1	1	0	0	0.1	1	0	0	0.1	1	0	0	0.1	1	0	0	0.1	1	0	0	0.1	1	0	0	0.1	1	0	0	0.1	1	0
hsa-miR-569	0	0.1	1	0	0	0.1	1	0	0	0.1	1	0	0	0.1	1	0	0	0.1	1	0	0	0.1	1	0	0	0.1	1	0	0	0.1	1	0
hsa-miR-570	0	0.1	1	0	0	0.1	1	0	0	0.1	1	0	0	0.1	1	0	0	0.1	1	0	0	0.1	1	0	0	0.1	1	0	0	0.1	1	0
hsa-miR-571	0	0.1	1	0	0	0.1	1	0	0	0.1	1	0	0	0.1	1	0	0	0.1	1	0	0	0.1	1	0	0	0.1	1	0	0	0.1	1	0
hsa-miR-572	0	166.128	16.1615	1	0	90.2886	8.7429	1	0	131.725	13.4026	1	0	173.137	16.6751	1	0	109.524	10.6017	1	0	186.092	17.9417	1	0	156.404	15.1444	1	0	200.003	18.9253	1
hsa-miR-573	0	0.1	1	0	0	0.1	1	0	0	0.1	1	0	0	0.1	1	0	0	0.1	1	0	0	0.1	1	0	0	0.1	1	0	0	0.1	1	0
hsa-miR-574-3p	0	82.9672	6.95693	1	0	56.7403	5.13744	1	0	61.9053	5.61385	1	0	80.9206	6.82961	1	0	176.115	13.1823	1	0	97.749	7.90115	1	0	188.666	14.2085	1	0	37.4265	4.20033	1
hsa-miR-574-5p	0	406.801	30.7063	1	0	224.295	17.2757	1	0	619.76	46.7792	1	0	265.1	20.292	1	0	405.054	30.497	1	0	297.66	22.5739	1	0	390.878	29.4461	1	0	756.468	56.3092	1
hsa-miR-575	0	611.342	43.3894	1	0	282.809	20.2637	1	0	165.222	12.1562	1	0	390.499	27.8522	1	0	131.34	9.78915	1	0	480.592	34.1963	1	0	306.664	21.9904	1	0	265.288	19.0667	1
hsa-miR-576-3p	0	0.1	1	0	0	0.1	1	0	0	0.1	1	0	0	0.1	1	0	0	0.1	1	0	0	0.1	1	0	0	0.1	1	0	0	0.1	1	0
hsa-miR-576-5p	0	0.1	1	0	0	0.1	1	0	0	0.1	1	0	0	0.1	1	0	0	0.1	1	0	0	0.1	1	0	0	0.1	1	0	0	0.1	1	0
hsa-miR-577	0	0.1	1	0	0	0.1	1	0	0	0.1	1	0	0	0.1	1	0	0	0.1	1	0	0	0.1	1	0	0	0.1	1	0	0	0.1	1	0
hsa-miR-578	0	0.1	1	0	0	0.1	1	0	0	0.1	1	0	0	0.1	1	0	0	0.1	1	0	0	0.1	1	0	0	0.1	1	0	0	0.1	1	0
hsa-miR-579	0	0.1	1	0	0	0.1	1	0	0	0.1	1	0	0	0.1	1	0	0	0.1	1	0	0	0.1	1	0	0	0.1	1	0	0	0.1	1	0
hsa-miR-580	0	0.1	1	0	0	0.1	1	0	0	0.1	1	0	0	0.1	1	0	0	0.1	1	0	0	0.1	1	0	0	0.1	1	0	0	0.1	1	0
hsa-miR-581	0	0.1	1	0	0	0.1	1	0	0	0.1	1	0	0	0.1	1	0	0	0.1	1	0	0	0.1	1	0	0	0.1	1	0	0	0.1	1	0
hsa-miR-582-3p	0	0.1	1	0	0	0.1	1	0	0	0.1	1	0	0	0.1	1	0	0	0.1	1	0	0	0.1	1	0	0	0.1	1	0	0	0.1	1	0
hsa-miR-582-5p	0	50.3129	4.89691	1	0	28.1361	3.67821	1	0	7.50941	2.43269	1	0	131.781	9.94822	1	0	17.4318	3.27425	1	0	22.6718	3.90582	1	0	31.2203	4.094	1	0	0.1	1	0
hsa-miR-583	0	0.1	1	0	0	0.1	1	0	0	0.1	1	0	0	0.1	1	0	0	0.1	1	0	0	0.1	1	0	0	0.1	1	0	0	0.1	1	0
hsa-miR-584	0	46.0276	4.974	1	0	0.1	1	0	0	54.3376	5.20216	1	0	22.6158	3.29981	1	0	0.1	1	0	0	0.1	1	0	0	28.4862	3.9911	1	0	15.9098	3.42172	1
hsa-miR-585	0	0.1	1	0	0	0.1	1	0	0	0.1	1	0	0	0.1	1	0	0	0.1	1	0	0	0.1	1	0	0	0.1	1	0	0	0.1	1	0
hsa-miR-586	0	0.1	1	0	0	0.1	1	0	0	0.1	1	0	0	0.1	1	0	0	0.1	1	0	0	0.1	1	0	0	0.1	1	0	0	0.1	1	0
hsa-miR-587	0	0.1	1	0	0	0.1	1	0	0	0.1	1	0	0	0.1	1	0	0	0.1	1	0	0	0.1	1	0	0	0.1	1	0	0	0.1	1	0
hsa-miR-588	0	0.1	1	0	0	0.1	1	0	0	0.1	1	0	0	0.1	1	0	0	0.1	1	0	0	0.1	1	0	0	0.1	1	0	0	0.1	1	0
hsa-miR-589	0	0.1	1	0	0	0.1	1	0	0	0.1	1	0	0	0.1	1	0	0	0.1	1	0	0	0.1	1	0	0	0.1	1	0	0	0.1	1	0
hsa-miR-589*	0	0.1	1	0	0	0.1	1	0	0	0.1	1	0	0	0.1	1	0	0	0.1	1	0	0	0.1	1	0	0	0.1	1	0	0	0.1	1	0
hsa-miR-590-3p	0	0.1	1	0	0	0.1	1	0	0	0.1	1	0	0	0.1	1	0	0	0.1	1	0	0	0.1	1	0	0	0.1	1	0	0	0.1	1	0
hsa-miR-590-5p	0	137.938	10.9742	1	0	80.268	6.75016	1	0	71.5341	6.47719	1	0	136.125	10.7553	1	0	55.7013	5.26258	1	0	52.9557	5.289	1	0	70.8949	6.30935	1	0	11.9679	2.57713	1
hsa-miR-591	0	0.1	1	0	0	0.1	1	0	0	0.1	1	0	0	0.1	1	0	0	0.1	1	0	0	0.1	1	0	0	0.1	1	0	0	0.1	1	0
hsa-miR-592	0	37.962	4.40521	1	0	0.1	1	0	0	0.1	1	0	0	8.84265	2.55824	1	0	0.1	1	0	0	0.1	1	0	0	0.1	1	0	0	0.1	1	0
hsa-miR-593	0	0.1	1	0	0	0.1	1	0	0	0.1	1	0	0	0.1	1	0	0	0.1	1	0	0	0.1	1	0	0	0.1	1	0	0	0.1	1	0
hsa-miR-593*	0	0.1	1	0	0	0.1	1	0	0	0.1	1	0	0	0.1	1	0	0	0.1	1	0	0	0.1	1	0	0	0.1	1	0	0	0.1	1	0
hsa-miR-595	0	0.1	1	0	0	0.1	1	0	0	0.1	1	0	0	0.1	1	0	0	0.1	1	0	0	0.1	1	0	0	0.1	1	0	0	0.1	1	0
hsa-miR-596	0	0.1	1	0	0	0.1	1	0	0	0.1	1	0	0	0.1	1	0	0	0.1	1	0	0	0.1	1	0	0	0.1	1	0	0	0.1	1	0
hsa-miR-597	0	0.1	1	0	0	0.1	1	0	0	0.1	1	0	0	0.1	1	0	0	0.1	1	0	0	0.1	1	0	0	0.1	1	0	0	0.1	1	0
hsa-miR-598	0	11.2087	2.61857	1	0	6.94811	2.28913	1	0	0.1	1	0	0	35.3129	4.26753	1	0	14.4394	2.58333	1	0	7.98831	2.63796	1	0	15.1207	2.86496	1	0	0.1	1	0
hsa-miR-599	0	0.1	1	0	0	0.1	1	0	0	0.1	1	0	0	0.1	1	0	0	0.1	1	0	0	0.1	1	0	0	0.1	1	0	0	0.1	1	0
hsa-miR-600	0	0.1	1	0	0	0.1	1	0	0	0.1	1	0	0	0.1	1	0	0	0.1	1	0	0	0.1	1	0	0	0.1	1	0	0	0.1	1	0
hsa-miR-601	0	81.1955	4.70437	1	0	46.3065	3.18835	1	0	39.5091	3.04102	1	0	83.7561	4.83267	1	0	25.3718	2.4983	1	0	39.7297	3.20975	1	0	58.9235	3.82984	1	0	38.2769	2.98956	1
hsa-miR-602	0	19.5594	2.95616	1	0	17.1839	2.7088	1	0	21.8465	2.95804	1	0	19.7291	2.99918	1	0	17.4224	2.67839	1	0	0.1	1	0	0	5.77608	1.68201	1	0	9.7546	2.2861	1
hsa-miR-603	0	0.1	1	0	0	0.1	1	0	0	0.1	1	0	0	0.1	1	0	0	0.1	1	0	0	0.1	1	0	0	0.1	1	0	0	0.1	1	0
hsa-miR-604	0	0.1	1	0	0	0.1	1	0	0	0.1	1	0	0	0.1	1	0	0	0.1	1	0	0	0.1	1	0	0	0.1	1	0	0	0.1	1	0
hsa-miR-605	0	0.1	1	0	0	0.1	1	0	0	0.1	1	0	0	0.1	1	0	0	0.1	1	0	0	0.1	1	0	0	0.1	1	0	0	0.1	1	0
hsa-miR-606	0	0.1	1	0	0	0.1	1	0	0	0.1	1	0	0	0.1	1	0	0	0.1	1	0	0	0.1	1	0	0	0.1	1	0	0	0.1	1	0
hsa-miR-607	0	0.1	1	0	0	0.1	1	0	0	0.1	1	0	0	0.1	1	0	0	0.1	1	0	0	0.1	1	0	0	0.1	1	0	0	0.1	1	0
hsa-miR-608	0	0.1	1	0	0	0.1	1	0	0	0.1	1	0	0	0.1	1	0	0	0.1	1	0	0	0.1	1	0	0	0.1	1	0	0	0.1	1	0
hsa-miR-609	0	0.1	1	0	0	0.1	1	0	0	0.1	1	0	0	0.1	1	0	0	0.1	1	0	0	0.1	1	0	0	0.1	1	0	0	0.1	1	0
hsa-miR-610	0	3.84674	1.24082	1	0	0.1	1	0	0	4.34015	1.23179	1	0	0.1	1	0	0	0.1	1	0	0	0.1	1	0	0	0.1	1	0	0	0.1	1	0
hsa-miR-611	0	0.1	1	0	0	0.1	1	0	0	0.1	1	0	0	0.1	1	0	0	0.1	1	0	0	0.1	1	0	0	0.1	1	0	0	0.1	1	0
hsa-miR-612	0	3.86818	1.24693	1	0	0.1	1	0	0	0.1	1	0	0	0.1	1	0	0	0.1	1	0	0	0.1	1	0	0	0.1	1	0	0	0.1	1	0
hsa-miR-613	0	0.1	1	0	0	0.1	1	0	0	0.1	1	0	0	0.1	1	0	0	0.1	1	0	0	0.1	1	0	0	0.1	1	0	0	0.1	1	0
hsa-miR-614	0	0.1	1	0	0	0.1	1	0	0	0.1	1	0	0	0.1	1	0	0	0.1	1	0	0	0.1	1	0	0	0.1	1	0	0	0.1	1	0
hsa-miR-615-3p	0	0.1	1	0	0	0.1	1	0	0	0.1	1	0	0	4.01857	1.26281	1	0	0.1	1	0	0	0.1	1	0	0	0.1	1	0	0	0.1	1	0
hsa-miR-615-5p	0	0.1	1	0	0	0.1	1	0	0	0.1	1	0	0	0.1	1	0	0	0.1	1	0	0	0.1	1	0	0	0.1	1	0	0	0.1	1	0
hsa-miR-616	0	0.1	1	0	0	0.1	1	0	0	0.1	1	0	0	0.1	1	0	0	0.1	1	0	0	0.1	1	0	0	0.1	1	0	0	0.1	1	0
hsa-miR-616*	0	0.1	1	0	0	0.1	1	0	0	0.1	1	0	0	0.1	1	0	0	0.1	1	0	0	0.1	1	0	0	0.1	1	0	0	0.1	1	0
hsa-miR-617	0	0.1	1	0	0	0.1	1	0	0	0.1	1	0	0	0.1	1	0	0	0.1	1	0	0	0.1	1	0	0	0.1	1	0	0	0.1	1	0
hsa-miR-618	0	0.1	1	0	0	0.1	1	0	0	0.1	1	0	0	0.1	1	0	0	0.1	1	0	0	0.1	1	0	0	0.1	1	0	0	0.1	1	0
hsa-miR-619	0	0.1	1	0	0	0.1	1	0	0	0.1	1	0	0	0.1	1	0	0	0.1	1	0	0	0.1	1	0	0	0.1	1	0	0	0.1	1	0
hsa-miR-620	0	0.1	1	0	0	0.1	1	0	0	0.1	1	0	0	0.1	1	0	0	0.1	1	0	0	0.1	1	0	0	0.1	1	0	0	0.1	1	0
hsa-miR-621	0	0.1	1	0	0	0.1	1	0	0	0.1	1	0	0	0.1	1	0	0	0.1	1	0	0	0.1	1	0	0	0.1	1	0	0	0.1	1	0
hsa-miR-622	0	144.559	9.14694	1	0	59.5898	4.43874	1	0	90.8511	6.14572	1	0	111.373	7.44531	1	0	16.739	2.66592	1	0	36.7634	3.65509	1	0	49.5521	4.04666	1	0	33.8416	3.31717	1
hsa-miR-623	0	33.253	3.05199	1	0	8.85009	1.40881	1	0	22.527	2.45029	1	0	13.9476	1.84053	1	0	5.94627	1.22959	1	0	10.9351	1.67018	1	0	25.2936	2.65301	1	0	18.1813	2.3196	1
hsa-miR-624	0	0.1	1	0	0	0.1	1	0	0	0.1	1	0	0	0.1	1	0	0	0.1	1	0	0	0.1	1	0	0	0.1	1	0	0	0.1	1	0
hsa-miR-624*	0	0.1	1	0	0	0.1	1	0	0	0.1	1	0	0	4.29753	1.27511	1	0	0.1	1	0	0	0.1	1	0	0	0.1	1	0	0	0.1	1	0
hsa-miR-625	0	30.4049	3.8527	1	0	120.112	10.5978	1	0	111.927	10.2161	1	0	246.766	20.4348	1	0	16.3178	2.69946	1	0	31.9326	4.07072	1	0	59.7987	6.07408	1	0	0.1	1	0
hsa-miR-625*	0	0.1	1	0	0	0.1	1	0	0	0.1	1	0	0	4.03102	1.26728	1	0	0.1	1	0	0	0.1	1	0	0	0.1	1	0	0	0.1	1	0
hsa-miR-626	0	0.1	1	0	0	0.1	1	0	0	0.1	1	0	0	0.1	1	0	0	0.1	1	0	0	0.1	1	0	0	0.1	1	0	0	0.1	1	0
hsa-miR-627	0	0.1	1	0	0	0.1	1	0	0	0.1	1	0	0	0.1	1	0	0	0.1	1	0	0	0.1	1	0	0	0.1	1	0	0	0.1	1	0
hsa-miR-628-3p	0	0.1	1	0	0	0.1	1	0	0	0.1	1	0	0	0.1	1	0	0	0.1	1	0	0	0.1	1	0	0	0.1	1	0	0	0.1	1	0
hsa-miR-628-5p	0	0.1	1	0	0	0.1	1	0	0	0.1	1	0	0	0.1	1	0	0	8.69367	1.63542	1	0	0.1	1	0	0	0.1	1	0	0	0.1	1	0
hsa-miR-629	0	4.94025	1.27968	1	0	5.82564	1.23521	1	0	3.79945	1.22275	1	0	7.20594	1.4008	1	0	0.1	1	0	0	5.05329	1.35694	1	0	6.46044	1.37716	1	0	0.1	1	0
hsa-miR-629*	0	13.9056	2.20724	1	0	30.3944	2.67862	1	0	4.26697	1.22968	1	0	10.6579	1.85917	1	0	0.1	1	0	0	0.1	1	0	0	5.14768	1.31854	1	0	0.1	1	0
hsa-miR-630	0	273.928	19.6789	1	0	102.37	7.87905	1	0	200.437	14.5761	1	0	256.202	18.4455	1	0	37.5607	4.05126	1	0	116.091	8.96269	1	0	137.07	10.2938	1	0	72.4846	6.06756	1
hsa-miR-631	0	0.1	1	0	0	0.1	1	0	0	9.89033	2.5163	1	0	0.1	1	0	0	0.1	1	0	0	0.1	1	0	0	0.1	1	0	0	0.1	1	0
hsa-miR-632	0	0.1	1	0	0	0.1	1	0	0	0.1	1	0	0	0.1	1	0	0	0.1	1	0	0	0.1	1	0	0	0.1	1	0	0	0.1	1	0
hsa-miR-633	0	0.1	1	0	0	0.1	1	0	0	0.1	1	0	0	0.1	1	0	0	0.1	1	0	0	0.1	1	0	0	0.1	1	0	0	0.1	1	0
hsa-miR-634	0	0.1	1	0	0	0.1	1	0	0	10.574	1.80517	1	0	0.1	1	0	0	23.3478	2.45087	1	0	0.1	1	0	0	0.1	1	0	0	22.1131	2.55134	1
hsa-miR-635	0	0.1	1	0	0	0.1	1	0	0	0.1	1	0	0	0.1	1	0	0	0.1	1	0	0	0.1	1	0	0	0.1	1	0	0	0.1	1	0
hsa-miR-636	0	0.1	1	0	0	0.1	1	0	0	0.1	1	0	0	0.1	1	0	0	0.1	1	0	0	0.1	1	0	0	0.1	1	0	0	0.1	1	0
hsa-miR-637	0	0.1	1	0	0	0.1	1	0	0	0.1	1	0	0	0.1	1	0	0	0.1	1	0	0	0.1	1	0	0	0.1	1	0	0	0.1	1	0
hsa-miR-638	0	1776.47	135.935	1	0	960.995	72.7829	1	0	1181.89	90.4149	1	0	1906.15	145.04	1	0	1195.66	89.4813	1	0	1585.76	119.757	1	0	1523.75	115.732	1	0	2104.82	156.492	1
hsa-miR-639	0	0.1	1	0	0	0.1	1	0	0	0.1	1	0	0	0.1	1	0	0	0.1	1	0	0	0.1	1	0	0	0.1	1	0	0	0.1	1	0
hsa-miR-640	0	0.1	1	0	0	0.1	1	0	0	0.1	1	0	0	0.1	1	0	0	0.1	1	0	0	0.1	1	0	0	0.1	1	0	0	0.1	1	0
hsa-miR-641	0	5.60019	1.30656	1	0	0.1	1	0	0	0.1	1	0	0	0.1	1	0	0	0.1	1	0	0	0.1	1	0	0	4.11969	1.28239	1	0	0.1	1	0
hsa-miR-642a	0	0.1	1	0	0	0.1	1	0	0	0.1	1	0	0	0.1	1	0	0	0.1	1	0	0	0.1	1	0	0	0.1	1	0	0	0.1	1	0
hsa-miR-642b	0	402.357	28.7045	1	0	143.254	10.6092	1	0	365.752	26.1408	1	0	343.566	24.5695	1	0	85.1241	6.75458	1	0	153.465	11.4442	1	0	165.203	12.2422	1	0	110.256	8.4697	1
hsa-miR-643	0	0.1	1	0	0	0.1	1	0	0	0.1	1	0	0	0.1	1	0	0	0.1	1	0	0	0.1	1	0	0	0.1	1	0	0	0.1	1	0
hsa-miR-644	0	0.1	1	0	0	0.1	1	0	0	0.1	1	0	0	0.1	1	0	0	0.1	1	0	0	0.1	1	0	0	0.1	1	0	0	0.1	1	0
hsa-miR-645	0	0.1	1	0	0	0.1	1	0	0	0.1	1	0	0	0.1	1	0	0	0.1	1	0	0	0.1	1	0	0	0.1	1	0	0	0.1	1	0
hsa-miR-646	0	0.1	1	0	0	0.1	1	0	0	0.1	1	0	0	0.1	1	0	0	0.1	1	0	0	0.1	1	0	0	0.1	1	0	0	0.1	1	0
hsa-miR-647	0	0.1	1	0	0	0.1	1	0	0	0.1	1	0	0	0.1	1	0	0	0.1	1	0	0	0.1	1	0	0	0.1	1	0	0	0.1	1	0
hsa-miR-648	0	0.1	1	0	0	0.1	1	0	0	0.1	1	0	0	0.1	1	0	0	0.1	1	0	0	0.1	1	0	0	0.1	1	0	0	0.1	1	0
hsa-miR-649	0	0.1	1	0	0	0.1	1	0	0	0.1	1	0	0	0.1	1	0	0	0.1	1	0	0	0.1	1	0	0	0.1	1	0	0	0.1	1	0
hsa-miR-650	0	0.1	1	0	0	0.1	1	0	0	7.78053	1.79937	1	0	9.49069	1.93116	1	0	0.1	1	0	0	10.8909	2.0701	1	0	71.0979	6.8066	1	0	14.83	2.1872	1
hsa-miR-651	0	0.1	1	0	0	0.1	1	0	0	0.1	1	0	0	0.1	1	0	0	0.1	1	0	0	0.1	1	0	0	0.1	1	0	0	0.1	1	0
hsa-miR-652	0	38.6586	4.5321	1	0	23.5251	3.21183	1	0	32.9959	4.03745	1	0	31.3626	3.95706	1	0	38.755	4.43095	1	0	33.3193	4.17459	1	0	50.5821	5.61435	1	0	15.0198	2.7411	1
hsa-miR-653	0	0.1	1	0	0	0.1	1	0	0	0.1	1	0	0	0.1	1	0	0	0.1	1	0	0	0.1	1	0	0	0.1	1	0	0	0.1	1	0
hsa-miR-654-3p	0	9.23769	2.54285	1	0	0.1	1	0	0	8.22132	2.46447	1	0	0.1	1	0	0	86.0748	8.08102	1	0	13.2971	2.83782	1	0	18.3808	3.06071	1	0	0.1	1	0
hsa-miR-654-5p	0	4.78884	1.27217	1	0	0.1	1	0	0	0.1	1	0	0	4.15231	1.26729	1	0	0.1	1	0	0	0.1	1	0	0	0.1	1	0	0	0.1	1	0
hsa-miR-655	0	0.1	1	0	0	0.1	1	0	0	0.1	1	0	0	0.1	1	0	0	0.1	1	0	0	0.1	1	0	0	0.1	1	0	0	0.1	1	0
hsa-miR-656	0	0.1	1	0	0	0.1	1	0	0	0.1	1	0	0	0.1	1	0	0	0.1	1	0	0	0.1	1	0	0	0.1	1	0	0	0.1	1	0
hsa-miR-657	0	0.1	1	0	0	0.1	1	0	0	0.1	1	0	0	0.1	1	0	0	0.1	1	0	0	0.1	1	0	0	0.1	1	0	0	0.1	1	0
hsa-miR-658	0	0.1	1	0	0	0.1	1	0	0	0.1	1	0	0	0.1	1	0	0	0.1	1	0	0	0.1	1	0	0	0.1	1	0	0	0.1	1	0
hsa-miR-659	0	34.5041	4.16701	1	0	0.1	1	0	0	11.7746	2.59528	1	0	20.5336	3.69247	1	0	0.1	1	0	0	0.1	1	0	0	21.649	3.78285	1	0	0.1	1	0
hsa-miR-660	0	288.701	24.1611	1	0	84.2484	7.64343	1	0	149.026	12.9526	1	0	167.407	14.2251	1	0	186.767	15.9112	1	0	111.321	10.0048	1	0	210.688	17.971	1	0	27.8095	3.59856	1
hsa-miR-661	0	0.1	1	0	0	0.1	1	0	0	0.1	1	0	0	0.1	1	0	0	0.1	1	0	0	0.1	1	0	0	0.1	1	0	0	0.1	1	0
hsa-miR-662	0	0.1	1	0	0	0.1	1	0	0	0.1	1	0	0	0.1	1	0	0	0.1	1	0	0	0.1	1	0	0	0.1	1	0	0	0.1	1	0
hsa-miR-663	0	544.251	41.173	1	0	249.367	18.8324	1	0	193.868	15.1747	1	0	181.146	14.0398	1	0	64.9085	5.86728	1	0	186.281	14.7522	1	0	173.649	13.8878	1	0	96.6633	8.32543	1
hsa-miR-663b	0	0.1	1	0	0	0.1	1	0	0	18.9194	2.99576	1	0	0.1	1	0	0	0.1	1	0	0	0.1	1	0	0	0.1	1	0	0	8.23122	2.42864	1
hsa-miR-664	0	7.47645	2.48122	1	0	0.1	1	0	0	18.6723	3.52927	1	0	0.1	1	0	0	50.5557	4.69829	1	0	20.5118	3.83983	1	0	20.2362	3.72966	1	0	32.3817	3.96739	1
hsa-miR-664*	0	64.8264	6.30389	1	0	18.0093	2.82638	1	0	43.8384	4.93069	1	0	8.91937	2.56465	1	0	22.0533	3.07495	1	0	45.6566	5.08958	1	0	58.7037	5.78875	1	0	16.2801	2.80317	1
hsa-miR-665	0	4.46441	1.26521	1	0	0.1	1	0	0	4.28017	1.23404	1	0	0.1	1	0	0	26.6473	2.56019	1	0	0.1	1	0	0	0.1	1	0	0	8.36266	1.72647	1
hsa-miR-668	0	0.1	1	0	0	0.1	1	0	0	0.1	1	0	0	0.1	1	0	0	0.1	1	0	0	0.1	1	0	0	0.1	1	0	0	0.1	1	0
hsa-miR-670	0	0.1	1	0	0	0.1	1	0	0	0.1	1	0	0	0.1	1	0	0	0.1	1	0	0	0.1	1	0	0	0.1	1	0	0	0.1	1	0
hsa-miR-671-3p	0	0.1	1	0	0	0.1	1	0	0	0.1	1	0	0	0.1	1	0	0	0.1	1	0	0	0.1	1	0	0	0.1	1	0	0	0.1	1	0
hsa-miR-671-5p	0	160.058	12.0442	1	0	79.8616	6.51291	1	0	127.513	10.0464	1	0	109.423	8.58799	1	0	52.2203	4.83626	1	0	126.379	9.6757	1	0	186.645	14.409	1	0	135.35	10.42	1
hsa-miR-675	0	0.1	1	0	0	0.1	1	0	0	0.1	1	0	0	0.1	1	0	0	0.1	1	0	0	0.1	1	0	0	0.1	1	0	0	0.1	1	0
hsa-miR-675*	0	0.1	1	0	0	0.1	1	0	0	0.1	1	0	0	0.1	1	0	0	0.1	1	0	0	0.1	1	0	0	0.1	1	0	0	0.1	1	0
hsa-miR-676	0	0.1	1	0	0	0.1	1	0	0	0.1	1	0	0	0.1	1	0	0	0.1	1	0	0	0.1	1	0	0	0.1	1	0	0	0.1	1	0
hsa-miR-676*	0	0.1	1	0	0	0.1	1	0	0	0.1	1	0	0	0.1	1	0	0	0.1	1	0	0	0.1	1	0	0	0.1	1	0	0	0.1	1	0
hsa-miR-7	0	1440.33	119.321	1	0	654.955	56.8428	1	0	691.514	60.8205	1	0	1788.54	148.644	1	0	35.0978	4.12277	1	0	101.898	9.29082	1	0	264.205	22.1385	1	0	24.3281	3.34215	1
hsa-miR-7-1*	0	34.8659	4.27367	1	0	39.3015	4.31174	1	0	18.9682	2.98763	1	0	74.3206	6.60956	1	0	14.5971	2.59879	1	0	29.9468	4.22889	1	0	49.2491	5.11174	1	0	0.1	1	0
hsa-miR-7-2*	0	0.1	1	0	0	0.1	1	0	0	0.1	1	0	0	0.1	1	0	0	0.1	1	0	0	0.1	1	0	0	0.1	1	0	0	0.1	1	0
hsa-miR-708	0	0.1	1	0	0	0.1	1	0	0	0.1	1	0	0	0.1	1	0	0	0.1	1	0	0	0.1	1	0	0	0.1	1	0	0	0.1	1	0
hsa-miR-708*	0	0.1	1	0	0	0.1	1	0	0	0.1	1	0	0	0.1	1	0	0	0.1	1	0	0	0.1	1	0	0	0.1	1	0	0	0.1	1	0
hsa-miR-711	0	21.4616	3.67923	1	0	0.1	1	0	0	21.7676	3.63048	1	0	0.1	1	0	0	0.1	1	0	0	0.1	1	0	0	17.4367	3.66282	1	0	0.1	1	0
hsa-miR-718	0	33.5346	4.10026	1	0	23.6346	3.23992	1	0	12.2329	2.62051	1	0	26.8575	3.60531	1	0	8.34756	2.30976	1	0	0.1	1	0	0	14.7868	2.85108	1	0	12.1871	2.5974	1
hsa-miR-720	0	5768.23	472.654	1	0	6594.62	535.042	1	0	9564.88	790.785	1	0	1324.56	109.415	1	0	4176.94	348.974	1	0	3190.98	260.488	1	0	6165.72	503.3	1	0	3418.49	288.14	1
hsa-miR-744	0	7.70963	2.48388	1	0	11.3041	2.45226	1	0	18.5698	3.5389	1	0	26.402	3.8801	1	0	7.50463	2.2664	1	0	0.1	1	0	0	8.45813	2.57288	1	0	0.1	1	0
hsa-miR-744*	0	0.1	1	0	0	0.1	1	0	0	0.1	1	0	0	0.1	1	0	0	0.1	1	0	0	0.1	1	0	0	0.1	1	0	0	0.1	1	0
hsa-miR-758	0	0.1	1	0	0	0.1	1	0	0	0.1	1	0	0	0.1	1	0	0	11.1137	1.72177	1	0	0.1	1	0	0	0.1	1	0	0	0.1	1	0
hsa-miR-759	0	0.1	1	0	0	0.1	1	0	0	0.1	1	0	0	0.1	1	0	0	0.1	1	0	0	0.1	1	0	0	0.1	1	0	0	0.1	1	0
hsa-miR-760	0	11.7529	1.86649	1	0	0.1	1	0	0	9.93974	1.78171	1	0	4.07525	1.26772	1	0	0.1	1	0	0	4.76552	1.34319	1	0	12.0328	1.92233	1	0	0.1	1	0
hsa-miR-761	0	0.1	1	0	0	0.1	1	0	0	0.1	1	0	0	0.1	1	0	0	0.1	1	0	0	0.1	1	0	0	0.1	1	0	0	0.1	1	0
hsa-miR-762	0	595.447	44.2088	1	0	360.37	27.793	1	0	282.726	22.1627	1	0	507.039	39.7304	1	0	523.393	43.4338	1	0	225.2	17.2395	1	0	427.64	33.6198	1	0	389.335	29.8295	1
hsa-miR-764	0	0.1	1	0	0	0.1	1	0	0	0.1	1	0	0	0.1	1	0	0	0.1	1	0	0	0.1	1	0	0	0.1	1	0	0	0.1	1	0
hsa-miR-765	0	154.452	12.0855	1	0	62.873	5.66781	1	0	161.034	12.2804	1	0	91.6348	7.68104	1	0	43.2138	4.42329	1	0	83.3785	7.13444	1	0	126.98	9.93969	1	0	92.0774	7.66392	1
hsa-miR-766	0	17.6001	2.2887	1	0	16.1987	2.10733	1	0	31.5681	2.84289	1	0	21.8472	2.45291	1	0	35.9553	2.7924	1	0	19.6937	2.45855	1	0	28.3371	2.83165	1	0	29.142	2.60597	1
hsa-miR-767-3p	0	0.1	1	0	0	0.1	1	0	0	4.28223	1.23565	1	0	0.1	1	0	0	0.1	1	0	0	0.1	1	0	0	0.1	1	0	0	0.1	1	0
hsa-miR-767-5p	0	0.1	1	0	0	0.1	1	0	0	0.1	1	0	0	0.1	1	0	0	0.1	1	0	0	0.1	1	0	0	0.1	1	0	0	0.1	1	0
hsa-miR-769-3p	0	5.05177	1.28701	1	0	0.1	1	0	0	0.1	1	0	0	5.73931	1.32968	1	0	0.1	1	0	0	0.1	1	0	0	0.1	1	0	0	0.1	1	0
hsa-miR-769-5p	0	14.4744	2.76911	1	0	20.3461	3.4298	1	0	11.0186	2.55902	1	0	12.6926	2.7126	1	0	37.2037	4.16489	1	0	9.96	2.70007	1	0	12.1721	2.71446	1	0	9.10924	2.46059	1
hsa-miR-770-5p	0	0.1	1	0	0	0.1	1	0	0	0.1	1	0	0	0.1	1	0	0	0.1	1	0	0	0.1	1	0	0	0.1	1	0	0	0.1	1	0
hsa-miR-802	0	0.1	1	0	0	0.1	1	0	0	0.1	1	0	0	0.1	1	0	0	0.1	1	0	0	0.1	1	0	0	0.1	1	0	0	0.1	1	0
hsa-miR-873	0	0.1	1	0	0	0.1	1	0	0	0.1	1	0	0	0.1	1	0	0	0.1	1	0	0	0.1	1	0	0	0.1	1	0	0	0.1	1	0
hsa-miR-874	0	77.7503	6.80169	1	0	50.1758	5.01445	1	0	41.8887	4.7148	1	0	53.8408	5.36336	1	0	81.0721	6.99354	1	0	57.2413	5.58649	1	0	79.3631	6.92091	1	0	55.9986	5.17907	1
hsa-miR-875-3p	0	0.1	1	0	0	0.1	1	0	0	0.1	1	0	0	0.1	1	0	0	0.1	1	0	0	0.1	1	0	0	0.1	1	0	0	0.1	1	0
hsa-miR-875-5p	0	0.1	1	0	0	0.1	1	0	0	0.1	1	0	0	0.1	1	0	0	0.1	1	0	0	0.1	1	0	0	0.1	1	0	0	0.1	1	0
hsa-miR-876-3p	0	0.1	1	0	0	0.1	1	0	0	0.1	1	0	0	0.1	1	0	0	0.1	1	0	0	0.1	1	0	0	0.1	1	0	0	0.1	1	0
hsa-miR-876-5p	0	0.1	1	0	0	0.1	1	0	0	0.1	1	0	0	0.1	1	0	0	0.1	1	0	0	0.1	1	0	0	0.1	1	0	0	0.1	1	0
hsa-miR-877	0	16.9054	2.27642	1	0	3.61247	1.15421	1	0	4.22112	1.23144	1	0	10.122	1.84532	1	0	0.1	1	0	0	4.29964	1.32598	1	0	0.1	1	0	0	0.1	1	0
hsa-miR-877*	0	11.7411	1.87255	1	0	3.43978	1.13973	1	0	0.1	1	0	0	35.0405	2.94976	1	0	16.2969	2.08578	1	0	0.1	1	0	0	0.1	1	0	0	13.6608	2.13073	1
hsa-miR-885-3p	0	0.1	1	0	0	0.1	1	0	0	0.1	1	0	0	0.1	1	0	0	0.1	1	0	0	0.1	1	0	0	0.1	1	0	0	0.1	1	0
hsa-miR-885-5p	0	0.1	1	0	0	0.1	1	0	0	0.1	1	0	0	0.1	1	0	0	0.1	1	0	0	0.1	1	0	0	0.1	1	0	0	0.1	1	0
hsa-miR-887	0	3.70561	1.23515	1	0	0.1	1	0	0	0.1	1	0	0	0.1	1	0	0	5.78151	1.21633	1	0	0.1	1	0	0	0.1	1	0	0	0.1	1	0
hsa-miR-888	0	0.1	1	0	0	0.1	1	0	0	0.1	1	0	0	0.1	1	0	0	0.1	1	0	0	0.1	1	0	0	0.1	1	0	0	0.1	1	0
hsa-miR-888*	0	0.1	1	0	0	0.1	1	0	0	0.1	1	0	0	0.1	1	0	0	0.1	1	0	0	0.1	1	0	0	0.1	1	0	0	0.1	1	0
hsa-miR-889	0	0.1	1	0	0	0.1	1	0	0	0.1	1	0	0	0.1	1	0	0	0.1	1	0	0	0.1	1	0	0	0.1	1	0	0	0.1	1	0
hsa-miR-890	0	0.1	1	0	0	0.1	1	0	0	0.1	1	0	0	0.1	1	0	0	0.1	1	0	0	0.1	1	0	0	0.1	1	0	0	0.1	1	0
hsa-miR-891a	0	0.1	1	0	0	0.1	1	0	0	0.1	1	0	0	0.1	1	0	0	0.1	1	0	0	0.1	1	0	0	0.1	1	0	0	0.1	1	0
hsa-miR-891b	0	0.1	1	0	0	0.1	1	0	0	0.1	1	0	0	0.1	1	0	0	0.1	1	0	0	0.1	1	0	0	0.1	1	0	0	0.1	1	0
hsa-miR-892a	0	0.1	1	0	0	0.1	1	0	0	0.1	1	0	0	0.1	1	0	0	0.1	1	0	0	0.1	1	0	0	0.1	1	0	0	0.1	1	0
hsa-miR-892b	0	3.96588	1.25338	1	0	3.7416	1.15174	1	0	0.1	1	0	0	0.1	1	0	0	0.1	1	0	0	4.0384	1.3167	1	0	0.1	1	0	0	0.1	1	0
hsa-miR-9	0	0.1	1	0	0	0.1	1	0	0	0.1	1	0	0	0.1	1	0	0	33.9486	4.07071	1	0	0.1	1	0	0	0.1	1	0	0	0.1	1	0
hsa-miR-9*	0	0.1	1	0	0	0.1	1	0	0	0.1	1	0	0	0.1	1	0	0	49.467	4.70857	1	0	0.1	1	0	0	0.1	1	0	0	0.1	1	0
hsa-miR-920	0	0.1	1	0	0	0.1	1	0	0	0.1	1	0	0	0.1	1	0	0	0.1	1	0	0	0.1	1	0	0	0.1	1	0	0	0.1	1	0
hsa-miR-921	0	0.1	1	0	0	0.1	1	0	0	0.1	1	0	0	0.1	1	0	0	0.1	1	0	0	0.1	1	0	0	0.1	1	0	0	0.1	1	0
hsa-miR-922	0	0.1	1	0	0	0.1	1	0	0	0.1	1	0	0	0.1	1	0	0	0.1	1	0	0	0.1	1	0	0	0.1	1	0	0	0.1	1	0
hsa-miR-924	0	0.1	1	0	0	0.1	1	0	0	0.1	1	0	0	0.1	1	0	0	0.1	1	0	0	0.1	1	0	0	0.1	1	0	0	0.1	1	0
hsa-miR-92a	0	3093.89	246.169	1	0	938.959	73.3551	1	0	572.886	45.7532	1	0	1261.89	100.02	1	0	893.709	70.2433	1	0	769.456	60.3199	1	0	1040.36	82.1744	1	0	542.737	42.0092	1
hsa-miR-92a-1*	0	0.1	1	0	0	0.1	1	0	0	0.1	1	0	0	0.1	1	0	0	0.1	1	0	0	0.1	1	0	0	0.1	1	0	0	0.1	1	0
hsa-miR-92a-2*	0	0.1	1	0	0	0.1	1	0	0	0.1	1	0	0	0.1	1	0	0	0.1	1	0	0	0.1	1	0	0	0.1	1	0	0	0.1	1	0
hsa-miR-92b	0	0.1	1	0	0	0.1	1	0	0	0.1	1	0	0	0.1	1	0	0	0.1	1	0	0	0.1	1	0	0	0.1	1	0	0	0.1	1	0
hsa-miR-92b*	0	0.1	1	0	0	0.1	1	0	0	0.1	1	0	0	0.1	1	0	0	0.1	1	0	0	0.1	1	0	0	0.1	1	0	0	0.1	1	0
hsa-miR-93	0	1069.01	96.9716	1	0	712.525	63.7523	1	0	430.336	39.7271	1	0	969.841	87.648	1	0	315.108	28.8545	1	0	402.596	36.1589	1	0	477.405	43.3154	1	0	301.696	27.0999	1
hsa-miR-93*	0	0.1	1	0	0	0.1	1	0	0	0.1	1	0	0	0.1	1	0	0	0.1	1	0	0	0.1	1	0	0	0.1	1	0	0	0.1	1	0
hsa-miR-933	0	0.1	1	0	0	0.1	1	0	0	3.71903	1.21588	1	0	0.1	1	0	0	4.83555	1.17888	1	0	0.1	1	0	0	0.1	1	0	0	3.90016	1.20488	1
hsa-miR-934	0	0.1	1	0	0	0.1	1	0	0	0.1	1	0	0	0.1	1	0	0	0.1	1	0	0	0.1	1	0	0	0.1	1	0	0	0.1	1	0
hsa-miR-935	0	0.1	1	0	0	0.1	1	0	0	0.1	1	0	0	0.1	1	0	0	0.1	1	0	0	0.1	1	0	0	0.1	1	0	0	0.1	1	0
hsa-miR-936	0	11.9803	2.64276	1	0	0.1	1	0	0	0.1	1	0	0	8.14231	2.53213	1	0	0.1	1	0	0	0.1	1	0	0	10.5554	2.65171	1	0	0.1	1	0
hsa-miR-937	0	0.1	1	0	0	0.1	1	0	0	0.1	1	0	0	0.1	1	0	0	0.1	1	0	0	0.1	1	0	0	0.1	1	0	0	0.1	1	0
hsa-miR-938	0	0.1	1	0	0	0.1	1	0	0	0.1	1	0	0	0.1	1	0	0	0.1	1	0	0	0.1	1	0	0	0.1	1	0	0	0.1	1	0
hsa-miR-939	0	485.273	36.5531	1	0	218.133	16.6359	1	0	253.951	18.9752	1	0	243.042	18.6407	1	0	128.162	9.98165	1	0	261.169	19.9228	1	0	429.731	32.3678	1	0	441.571	35.4991	1
hsa-miR-940	0	278.312	22.0904	1	0	201.224	16.0919	1	0	130.72	10.6554	1	0	395.966	31.5366	1	0	102.135	8.09743	1	0	134.619	10.9936	1	0	158.558	12.8171	1	0	102.922	8.34305	1
hsa-miR-941	0	0.1	1	0	0	0.1	1	0	0	0.1	1	0	0	0.1	1	0	0	0.1	1	0	0	0.1	1	0	0	0.1	1	0	0	0.1	1	0
hsa-miR-942	0	0.1	1	0	0	0.1	1	0	0	0.1	1	0	0	0.1	1	0	0	0.1	1	0	0	0.1	1	0	0	0.1	1	0	0	0.1	1	0
hsa-miR-943	0	0.1	1	0	0	0.1	1	0	0	0.1	1	0	0	0.1	1	0	0	0.1	1	0	0	0.1	1	0	0	0.1	1	0	0	0.1	1	0
hsa-miR-944	0	0.1	1	0	0	0.1	1	0	0	0.1	1	0	0	0.1	1	0	0	0.1	1	0	0	0.1	1	0	0	0.1	1	0	0	0.1	1	0
hsa-miR-95	0	177.789	13.7213	1	0	54.6533	5.10325	1	0	13.1076	2.66692	1	0	110.268	8.87027	1	0	37.1364	4.16429	1	0	39.6873	4.63914	1	0	76.8068	6.68638	1	0	0.1	1	0
hsa-miR-96	0	463.099	33.3879	1	0	274.995	19.9222	1	0	290.308	21.1746	1	0	487.139	35.1505	1	0	21.3982	3.41813	1	0	138.372	10.5583	1	0	142.213	10.7844	1	0	38.0337	4.25206	1
hsa-miR-96*	0	0.1	1	0	0	0.1	1	0	0	0.1	1	0	0	0.1	1	0	0	0.1	1	0	0	0.1	1	0	0	0.1	1	0	0	0.1	1	0
hsa-miR-98	0	250.514	22.569	1	0	91.7437	8.64984	1	0	209.374	19.1991	1	0	161.148	14.6479	1	0	151.424	14.0682	1	0	107.161	10.1892	1	0	162.949	14.8447	1	0	18.3287	2.93053	1
hsa-miR-99a	0	36.1839	4.45627	1	0	0.1	1	0	0	187.273	16.1425	1	0	8.33504	2.54342	1	0	3174.09	254.657	1	0	125.772	11.0722	1	0	194.717	16.3913	1	0	50.5001	5.21693	1
hsa-miR-99a*	0	0.1	1	0	0	0.1	1	0	0	0.1	1	0	0	0.1	1	0	0	0.1	1	0	0	0.1	1	0	0	0.1	1	0	0	0.1	1	0
hsa-miR-99b	0	103.865	8.61195	1	0	31.1408	3.85289	1	0	285.07	21.8572	1	0	40.9356	4.60821	1	0	446.365	32.8422	1	0	105.715	8.57654	1	0	127.145	10.1429	1	0	89.8818	7.17545	1
hsa-miR-99b*	0	20.7404	2.58004	1	0	4.3149	1.18192	1	0	0.1	1	0	0	35.8483	3.00273	1	0	3.5314	1.13207	1	0	0.1	1	0	0	0.1	1	0	0	0.1	1	0
hsv1-miR-H1	0	41.1106	4.65072	1	0	12.365	2.51034	1	0	34.7255	4.1559	1	0	28.7408	3.75351	1	0	9.13683	2.32822	1	0	14.6441	2.90573	1	0	43.1522	4.78445	1	0	13.6616	2.663	1
hsv1-miR-H1*	0	0.1	1	0	0	0.1	1	0	0	8.11376	2.44519	1	0	0.1	1	0	0	0.1	1	0	0	0.1	1	0	0	0.1	1	0	0	0.1	1	0
hsv1-miR-H11	0	0.1	1	0	0	0.1	1	0	0	0.1	1	0	0	0.1	1	0	0	0.1	1	0	0	0.1	1	0	0	0.1	1	0	0	0.1	1	0
hsv1-miR-H12	0	0.1	1	0	0	0.1	1	0	0	0.1	1	0	0	0.1	1	0	0	0.1	1	0	0	0.1	1	0	0	0.1	1	0	0	0.1	1	0
hsv1-miR-H13	0	0.1	1	0	0	0.1	1	0	0	0.1	1	0	0	0.1	1	0	0	0.1	1	0	0	0.1	1	0	0	0.1	1	0	0	0.1	1	0
hsv1-miR-H14-3p	0	0.1	1	0	0	0.1	1	0	0	0.1	1	0	0	0.1	1	0	0	0.1	1	0	0	0.1	1	0	0	0.1	1	0	0	0.1	1	0
hsv1-miR-H14-5p	0	0.1	1	0	0	0.1	1	0	0	0.1	1	0	0	0.1	1	0	0	0.1	1	0	0	0.1	1	0	0	0.1	1	0	0	0.1	1	0
hsv1-miR-H15	0	12.0578	2.6507	1	0	9.41856	2.37151	1	0	0.1	1	0	0	0.1	1	0	0	0.1	1	0	0	0.1	1	0	0	8.60374	2.57782	1	0	0.1	1	0
hsv1-miR-H16	0	33.4481	4.10202	1	0	0.1	1	0	0	18.3524	3.52234	1	0	27.8696	3.92175	1	0	0.1	1	0	0	0.1	1	0	0	8.98575	2.58954	1	0	0.1	1	0
hsv1-miR-H17	0	147.04	11.7261	1	0	86.0588	7.38663	1	0	63.4714	5.67453	1	0	160.644	13.1003	1	0	55.6609	5.17563	1	0	65.6645	6.12915	1	0	136.836	11.0317	1	0	100.537	8.46157	1
hsv1-miR-H18	0	140.39	10.5102	1	0	90.0698	7.16344	1	0	151.259	11.261	1	0	132.033	9.95254	1	0	126.88	10.2746	1	0	117.2	9.25231	1	0	136.119	10.3792	1	0	101.922	8.16215	1
hsv1-miR-H2	0	0.1	1	0	0	0.1	1	0	0	0.1	1	0	0	0.1	1	0	0	0.1	1	0	0	0.1	1	0	0	0.1	1	0	0	0.1	1	0
hsv1-miR-H2*	0	0.1	1	0	0	0.1	1	0	0	0.1	1	0	0	0.1	1	0	0	0.1	1	0	0	0.1	1	0	0	0.1	1	0	0	0.1	1	0
hsv1-miR-H3	0	0.1	1	0	0	0.1	1	0	0	0.1	1	0	0	0.1	1	0	0	0.1	1	0	0	0.1	1	0	0	0.1	1	0	0	0.1	1	0
hsv1-miR-H3*	0	0.1	1	0	0	0.1	1	0	0	0.1	1	0	0	0.1	1	0	0	0.1	1	0	0	0.1	1	0	0	0.1	1	0	0	0.1	1	0
hsv1-miR-H4	0	0.1	1	0	0	0.1	1	0	0	0.1	1	0	0	0.1	1	0	0	0.1	1	0	0	0.1	1	0	0	0.1	1	0	0	0.1	1	0
hsv1-miR-H4*	0	0.1	1	0	0	0.1	1	0	0	0.1	1	0	0	0.1	1	0	0	0.1	1	0	0	0.1	1	0	0	0.1	1	0	0	0.1	1	0
hsv1-miR-H5-3p	0	0.1	1	0	0	0.1	1	0	0	0.1	1	0	0	0.1	1	0	0	0.1	1	0	0	0.1	1	0	0	0.1	1	0	0	0.1	1	0
hsv1-miR-H5-5p	0	0.1	1	0	0	0.1	1	0	0	0.1	1	0	0	0.1	1	0	0	0.1	1	0	0	0.1	1	0	0	0.1	1	0	0	0.1	1	0
hsv1-miR-H6-3p	0	0.1	1	0	0	6.95462	2.28792	1	0	0.1	1	0	0	0.1	1	0	0	16.8609	3.25455	1	0	0.1	1	0	0	0.1	1	0	0	16.8806	3.44754	1
hsv1-miR-H6-5p	0	114.117	9.10906	1	0	58.5725	5.41245	1	0	49.3608	4.95599	1	0	59.6073	5.71735	1	0	37.0059	4.19207	1	0	67.7635	6.24341	1	0	97.5819	8.16362	1	0	51.7842	5.13713	1
hsv1-miR-H7	0	0.1	1	0	0	0.1	1	0	0	0.1	1	0	0	0.1	1	0	0	0.1	1	0	0	0.1	1	0	0	0.1	1	0	0	0.1	1	0
hsv1-miR-H7*	0	64.9727	6.91336	1	0	34.7556	4.11401	1	0	22.15	3.20147	1	0	52.1172	5.74517	1	0	29.1799	3.79399	1	0	27.4779	3.73685	1	0	62.1262	6.68355	1	0	40.5277	4.66159	1
hsv1-miR-H8	0	37.4164	4.45584	1	0	9.49808	2.37567	1	0	31.528	4.0285	1	0	10.8599	2.63182	1	0	36.4112	4.28139	1	0	51.93	5.3459	1	0	21.4213	3.23879	1	0	48.8724	5.18393	1
hsv1-miR-H8*	0	0.1	1	0	0	0.1	1	0	0	0.1	1	0	0	0.1	1	0	0	0.1	1	0	0	0.1	1	0	0	0.1	1	0	0	0.1	1	0
hsv2-miR-H10	0	1196.96	85.9168	1	0	734.834	52.6925	1	0	714.777	51.1978	1	0	1590.42	114.2	1	0	1279.14	92.7273	1	0	908.443	64.9296	1	0	1228.89	88.6376	1	0	1285.5	92.6081	1
hsv2-miR-H11*	0	0.1	1	0	0	0.1	1	0	0	0.1	1	0	0	0.1	1	0	0	0.1	1	0	0	0.1	1	0	0	0.1	1	0	0	0.1	1	0
hsv2-miR-H13	0	0.1	1	0	0	0.1	1	0	0	0.1	1	0	0	0.1	1	0	0	0.1	1	0	0	0.1	1	0	0	0.1	1	0	0	0.1	1	0
hsv2-miR-H19	0	0.1	1	0	0	0.1	1	0	0	0.1	1	0	0	0.1	1	0	0	0.1	1	0	0	0.1	1	0	0	0.1	1	0	0	0.1	1	0
hsv2-miR-H2	0	0.1	1	0	0	0.1	1	0	0	0.1	1	0	0	0.1	1	0	0	0.1	1	0	0	0.1	1	0	0	0.1	1	0	0	0.1	1	0
hsv2-miR-H20	0	0.1	1	0	0	0.1	1	0	0	0.1	1	0	0	0.1	1	0	0	0.1	1	0	0	0.1	1	0	0	0.1	1	0	0	0.1	1	0
hsv2-miR-H21	0	0.1	1	0	0	0.1	1	0	0	0.1	1	0	0	0.1	1	0	0	0.1	1	0	0	0.1	1	0	0	0.1	1	0	0	0.1	1	0
hsv2-miR-H22	0	114.479	8.80746	1	0	66.5011	5.63363	1	0	65.775	5.7261	1	0	81.5436	6.72027	1	0	66.3115	5.60463	1	0	64.8006	5.81321	1	0	89.6007	7.25079	1	0	103.064	7.98331	1
hsv2-miR-H23	0	0.1	1	0	0	0.1	1	0	0	0.1	1	0	0	0.1	1	0	0	0.1	1	0	0	0.1	1	0	0	0.1	1	0	0	0.1	1	0
hsv2-miR-H23*	0	0.1	1	0	0	0.1	1	0	0	0.1	1	0	0	0.1	1	0	0	0.1	1	0	0	0.1	1	0	0	0.1	1	0	0	0.1	1	0
hsv2-miR-H24	0	200.435	14.6119	1	0	130.665	9.77496	1	0	109.92	8.45381	1	0	237.585	17.1996	1	0	115.107	8.73339	1	0	109.547	8.53851	1	0	120.803	9.25731	1	0	134.021	10.0496	1
hsv2-miR-H25	0	511.799	37.2196	1	0	186.449	13.8736	1	0	279.193	20.269	1	0	365.414	26.7547	1	0	93.1198	7.30444	1	0	137.5	10.5151	1	0	212.523	15.6701	1	0	142.089	10.6426	1
hsv2-miR-H3	0	0.1	1	0	0	0.1	1	0	0	0.1	1	0	0	0.1	1	0	0	0.1	1	0	0	0.1	1	0	0	7.98012	2.55385	1	0	0.1	1	0
hsv2-miR-H4-3p	0	0.1	1	0	0	0.1	1	0	0	0.1	1	0	0	0.1	1	0	0	0.1	1	0	0	0.1	1	0	0	0.1	1	0	0	0.1	1	0
hsv2-miR-H4-5p	0	0.1	1	0	0	0.1	1	0	0	0.1	1	0	0	0.1	1	0	0	0.1	1	0	0	0.1	1	0	0	0.1	1	0	0	0.1	1	0
hsv2-miR-H5	0	0.1	1	0	0	0.1	1	0	0	0.1	1	0	0	0.1	1	0	0	0.1	1	0	0	0.1	1	0	0	0.1	1	0	0	0.1	1	0
hsv2-miR-H6	0	237.457	17.1379	1	0	167.555	12.3029	1	0	107.278	8.27067	1	0	256.943	18.5244	1	0	50.5476	4.69513	1	0	79.6888	6.66581	1	0	113.831	8.76214	1	0	83.0346	6.71501	1
hsv2-miR-H6*	0	0.1	1	0	0	0.1	1	0	0	0.1	1	0	0	0.1	1	0	0	0.1	1	0	0	0.1	1	0	0	0.1	1	0	0	0.1	1	0
hsv2-miR-H7-3p	0	0.1	1	0	0	0.1	1	0	0	0.1	1	0	0	0.1	1	0	0	8.48447	2.3059	1	0	0.1	1	0	0	0.1	1	0	0	7.681	2.40689	1
hsv2-miR-H7-5p	0	0.1	1	0	0	0.1	1	0	0	0.1	1	0	0	0.1	1	0	0	0.1	1	0	0	0.1	1	0	0	0.1	1	0	0	0.1	1	0
hsv2-miR-H9-3p	0	0.1	1	0	0	0.1	1	0	0	0.1	1	0	0	0.1	1	0	0	0.1	1	0	0	0.1	1	0	0	0.1	1	0	0	0.1	1	0
hsv2-miR-H9-5p	0	0.1	1	0	0	0.1	1	0	0	0.1	1	0	0	0.1	1	0	0	0.1	1	0	0	27.7623	4.0626	1	0	0.1	1	0	0	0.1	1	0
hur_1	1	147692	7431.36	1	1	114266	5754.36	1	1	137402	6912.32	1	1	129114	6491.45	1	1	157131	7906.66	1	1	124509	6262.14	1	1	125499	6315.3	1	1	116230	5856.61	1
hur_2	1	229170	11466.6	1	1	198520	9938.47	1	1	191860	9605.58	1	1	187828	9399.66	1	1	254835	12752.1	1	1	192490	9631.71	1	1	186386	9329.56	1	1	242364	12128.9	1
hur_4	1	22308.6	1270.33	1	1	15385.6	874.854	1	1	13981.9	795.144	1	1	15651.1	888.89	1	1	15339.3	875.38	1	1	15456.6	882.547	1	1	18867.4	1074.87	1	1	10520.5	598.35	1
hur_5	1	81.6443	4.75251	1	1	73.4862	4.3189	1	1	54.2235	3.58421	1	1	94.1667	5.31339	1	1	92.8458	5.16256	1	1	89.3518	5.16816	1	1	88.0061	5.07669	1	1	79.6546	4.61944	1
hur_6	1	84892.7	4955.04	1	1	53969.2	3151.88	1	1	79457.4	4629.62	1	1	62094.9	3624.08	1	1	90801.5	5301.67	1	1	88932.3	5189.65	1	1	98619.2	5749.73	1	1	32350.3	1894.24	1
jcv-miR-J1-5p	0	0.1	1	0	0	0.1	1	0	0	0.1	1	0	0	0.1	1	0	0	0.1	1	0	0	0.1	1	0	0	0.1	1	0	0	0.1	1	0
kshv-miR-K12-1	0	0.1	1	0	0	0.1	1	0	0	0.1	1	0	0	0.1	1	0	0	0.1	1	0	0	0.1	1	0	0	0.1	1	0	0	0.1	1	0
kshv-miR-K12-1*	0	0.1	1	0	0	0.1	1	0	0	0.1	1	0	0	0.1	1	0	0	0.1	1	0	0	0.1	1	0	0	0.1	1	0	0	0.1	1	0
kshv-miR-K12-10a*	0	0.1	1	0	0	0.1	1	0	0	0.1	1	0	0	0.1	1	0	0	0.1	1	0	0	0.1	1	0	0	0.1	1	0	0	0.1	1	0
kshv-miR-K12-10b	0	17.6739	2.20868	1	0	8.31455	1.36954	1	0	6.99231	1.34842	1	0	19.6843	2.36068	1	0	6.75875	1.27052	1	0	6.1501	1.39871	1	0	8.46536	1.48308	1	0	9.15383	1.46264	1
kshv-miR-K12-11	0	0.1	1	0	0	0.1	1	0	0	0.1	1	0	0	0.1	1	0	0	0.1	1	0	0	0.1	1	0	0	0.1	1	0	0	0.1	1	0
kshv-miR-K12-11*	0	0.1	1	0	0	0.1	1	0	0	0.1	1	0	0	0.1	1	0	0	0.1	1	0	0	0.1	1	0	0	0.1	1	0	0	0.1	1	0
kshv-miR-K12-12	0	0.1	1	0	0	0.1	1	0	0	0.1	1	0	0	0.1	1	0	0	0.1	1	0	0	0.1	1	0	0	0.1	1	0	0	0.1	1	0
kshv-miR-K12-12*	0	0.1	1	0	0	0.1	1	0	0	0.1	1	0	0	0.1	1	0	0	0.1	1	0	0	0.1	1	0	0	0.1	1	0	0	0.1	1	0
kshv-miR-K12-2	0	0.1	1	0	0	0.1	1	0	0	0.1	1	0	0	0.1	1	0	0	0.1	1	0	0	0.1	1	0	0	0.1	1	0	0	0.1	1	0
kshv-miR-K12-2*	0	0.1	1	0	0	0.1	1	0	0	0.1	1	0	0	0.1	1	0	0	0.1	1	0	0	0.1	1	0	0	0.1	1	0	0	0.1	1	0
kshv-miR-K12-3	0	698.268	56.4972	1	0	460.593	36.7651	1	0	441.048	36.9399	1	0	1028.55	82.4287	1	0	332.221	26.7059	1	0	614.196	50.2884	1	0	648.574	53.2913	1	0	675.465	55.5723	1
kshv-miR-K12-3*	0	0.1	1	0	0	0.1	1	0	0	0.1	1	0	0	0.1	1	0	0	0.1	1	0	0	0.1	1	0	0	0.1	1	0	0	0.1	1	0
kshv-miR-K12-4-3p	0	0.1	1	0	0	0.1	1	0	0	0.1	1	0	0	0.1	1	0	0	0.1	1	0	0	0.1	1	0	0	0.1	1	0	0	0.1	1	0
kshv-miR-K12-4-5p	0	0.1	1	0	0	0.1	1	0	0	0.1	1	0	0	0.1	1	0	0	0.1	1	0	0	0.1	1	0	0	0.1	1	0	0	0.1	1	0
kshv-miR-K12-5	0	0.1	1	0	0	0.1	1	0	0	0.1	1	0	0	0.1	1	0	0	0.1	1	0	0	0.1	1	0	0	0.1	1	0	0	0.1	1	0
kshv-miR-K12-5*	0	0.1	1	0	0	25.9595	3.58918	1	0	0.1	1	0	0	0.1	1	0	0	20.5381	3.36143	1	0	0.1	1	0	0	0.1	1	0	0	58.0214	5.23224	1
kshv-miR-K12-6-3p	0	0.1	1	0	0	0.1	1	0	0	0.1	1	0	0	0.1	1	0	0	0.1	1	0	0	0.1	1	0	0	0.1	1	0	0	0.1	1	0
kshv-miR-K12-6-5p	0	0.1	1	0	0	0.1	1	0	0	0.1	1	0	0	0.1	1	0	0	0.1	1	0	0	0.1	1	0	0	0.1	1	0	0	0.1	1	0
kshv-miR-K12-7	0	0.1	1	0	0	0.1	1	0	0	0.1	1	0	0	0.1	1	0	0	0.1	1	0	0	0.1	1	0	0	0.1	1	0	0	0.1	1	0
kshv-miR-K12-7*	0	0.1	1	0	0	19.1818	3.37741	1	0	0.1	1	0	0	0.1	1	0	0	18.9568	3.3388	1	0	0.1	1	0	0	0.1	1	0	0	61.4717	5.46114	1
kshv-miR-K12-8	0	0.1	1	0	0	0.1	1	0	0	0.1	1	0	0	0.1	1	0	0	0.1	1	0	0	0.1	1	0	0	0.1	1	0	0	0.1	1	0
kshv-miR-K12-8*	0	33.4675	4.10606	1	0	19.3257	3.36987	1	0	17.2563	3.49035	1	0	15.517	3.56036	1	0	17.9387	3.29538	1	0	19.6479	3.81282	1	0	8.1969	2.56113	1	0	18.4727	3.48376	1
kshv-miR-K12-9	0	0.1	1	0	0	0.1	1	0	0	0.1	1	0	0	0.1	1	0	0	0.1	1	0	0	0.1	1	0	0	0.1	1	0	0	0.1	1	0
kshv-miR-K12-9*	0	0.1	1	0	0	0.1	1	0	0	0.1	1	0	0	0.1	1	0	0	0.1	1	0	0	0.1	1	0	0	0.1	1	0	0	0.1	1	0
miRNABrightCorner30	1	15952.9	1626.22	1	1	12782.4	1303.21	1	1	19389	1974.91	1	1	14873.2	1518.35	1	1	14774.2	1495.99	1	1	12199.2	1247.21	1	1	11035.6	1121.72	1	1	17079	1737.96	1
mr_1	1	11358.8	595.667	1	1	6452.62	338.079	1	1	7832.65	411.801	1	1	5701.93	298.932	1	1	5315.25	275.735	1	1	4441.87	232.011	1	1	4876.28	254.855	1	1	3918.3	202.137	1
